# Supplementary material for: Insights into the mechanisms of Cu(i)-catalyzed heterocyclization of α-acyl-α-alkynyl ketene dithioacetals to form 3-cyanofurans: the roles of NH4OAc
Source: Royal Society of Chemistry journal article supplement (doi:10.1039/c9nj04423j), 2019-01-01
Supplement: c9nj04423j1.pdf [file c9nj04423j1.pdf]

# Insights into the Mechanisms of Cu(I)-Catalyzed Heterocyclization of $\alpha$ -Acyl- $\alpha$ -alkynyl Ketene Dithioacetals to form 3-Cyanofurans: the Roles of $\text{NH}_4\text{OAc}$

Binfang Yuan,<sup>a,b</sup> Zhenjie Tang,<sup>a</sup> Yinhe Lin,<sup>a</sup> Guangzhao Wang,<sup>c</sup> Luqiu Fang,<sup>a</sup> Xiaogang Guo,<sup>a</sup> Youli Zhao,<sup>a</sup>  
Xiaohua Xie,<sup>a\*</sup> Jinyang Chen,<sup>a\*</sup> Rongxing He<sup>b\*</sup>

<sup>a</sup> *Chongqing Key Laboratory of Inorganic Special Functional Materials, College of Chemistry and Chemical Engineering, Yangtze Normal University, Fuling, Chongqing 408100, China.*

<sup>b</sup> *College of Chemistry and Chemical Engineering, Southwest University, Chongqing 400715, China.*

<sup>c</sup> *College of Electronic Information Engineering, Key Laboratory of Extraordinary Bond Engineering and Advanced Materials, Technology, Yangtze Normal University, Fuling, Chongqing 408100, China.*

To whom correspondence should be addressed. E-mail: herx@swu.edu.cn

## Table of Contents:

|                                                                                                                                                                                          |    |
|------------------------------------------------------------------------------------------------------------------------------------------------------------------------------------------|----|
| Table S1. Exploring the effects of methods B3LYP, CAM-B3LYP, M06, BLYP, B3P86, B3PW91 and BHandHLYP by comparing the activation free energy barriers from <b>in1</b> to <b>ts1</b> ..... | 3  |
| Table S2. Exploring the effects of basis sets 6-31G*, 6-31G**, 6-31+G* and 6-311G* by comparing the activation free energy barriers from <b>in1</b> to <b>ts1</b> .....                  | 4  |
| Figure S1. DFT-computed energy profile for the proton-transfer reactions in the absence of CuBr.....                                                                                     | 5  |
| Figure S2. Comparing the free energy barriers of <b>ts3'</b> vs. <b>ts3</b> .....                                                                                                        | 6  |
| Figure S3. Comparing the free energy barriers of <b>ts4-NH<sub>3</sub>'</b> vs. <b>ts4-NH<sub>3</sub></b> .....                                                                          | 7  |
| Figure S4. DFT-computed energy profile for the NH <sub>3</sub> -assisted proton-transfer reactions.....                                                                                  | 8  |
| Figure S5. Comparing the free energy barriers of <b>ts3-HOAc'</b> vs. <b>ts3-HOAc</b> .....                                                                                              | 9  |
| Figure S6. DFT-computed energy profile for the HOAc-assisted proton-transfer reactions in the absence of CuBr.....                                                                       | 10 |
| Figure S7. Optimized geometries involved in the intramolecular cycloaddition and the intermolecular addition in the absence of CuBr.....                                                 | 11 |
| Scheme S1. The coordination effects of NH <sub>3</sub> with CuBr on the process of intramolecular cyclization.....                                                                       | 12 |
| Scheme S2. The effects of NH <sub>3</sub> (as the proton shuttle or the catalyst ligand) on the proton-transfer process.....                                                             | 13 |
| Intrinsic Reaction Coordinates.....                                                                                                                                                      | 14 |
| Cartesian coordinates of the optimized stationary points on the optimal reaction channels.....                                                                                           | 30 |

Table S1. Exploring the effects of methods B3LYP, CAM-B3LYP, M06, BLYP, B3P86, B3PW91 and BHandHLYP by comparing the activation free energy barriers from **in1** to **ts1** (the geometric structures of **in1** and **ts1** are optimized using B3LYP (CAM-B3LYP, M06, BLYP, B3P86, B3PW91 and BHandHLYP)/6-31G\* in gas phase, and the single point energies are obtained at the PCM//M06-2x/6-311++G\*\* calculated level in solution phase).

| Species    | Activation Free Energy Barriers (kJ/mol) |           |      |      |       |        |           |
|------------|------------------------------------------|-----------|------|------|-------|--------|-----------|
|            | B3LYP                                    | CAM-B3LYP | M06  | BLYP | B3P86 | B3PW91 | BHandHLYP |
| <b>ts1</b> | 72.4                                     | 71.1      | 73.9 | 66.5 | 70.2  | 69.7   | 76.9      |

Table S1 shows that the effects of DFT functionals B3LYP, CAM-B3LYP, M06, BLYP, B3P86, B3PW91 and BHandHLYP on the activation free energy barriers are very small.

Table S2. Exploring the effects of basis sets 6-31G\*, 6-31G\*\*, 6-31+G\* and 6-311G\* by comparing the activation free energy barriers from **in1** to **ts1** (the geometric structures of **in1** and **ts1** are optimized using B3LYP/6-31G\* (6-31G\*\*, 6-31+G\* and 6-311G\*) in gas phase, and the single point energies are obtained at the PCM//M06-2x/6-311++G\*\* calculated level in solution phase).

| Species    | Activation Free Energy Barriers (kJ/mol) |         |         |         |
|------------|------------------------------------------|---------|---------|---------|
|            | 6-31G*                                   | 6-31G** | 6-31+G* | 6-311G* |
| <b>ts1</b> | 72.4                                     | 72.2    | 73.8    | 72.8    |

Table S2 shows that the effects of basis sets 6-31G\*, 6-31G\*\*, 6-31+G\* and 6-311G\* on the activation free energy barriers are very small.

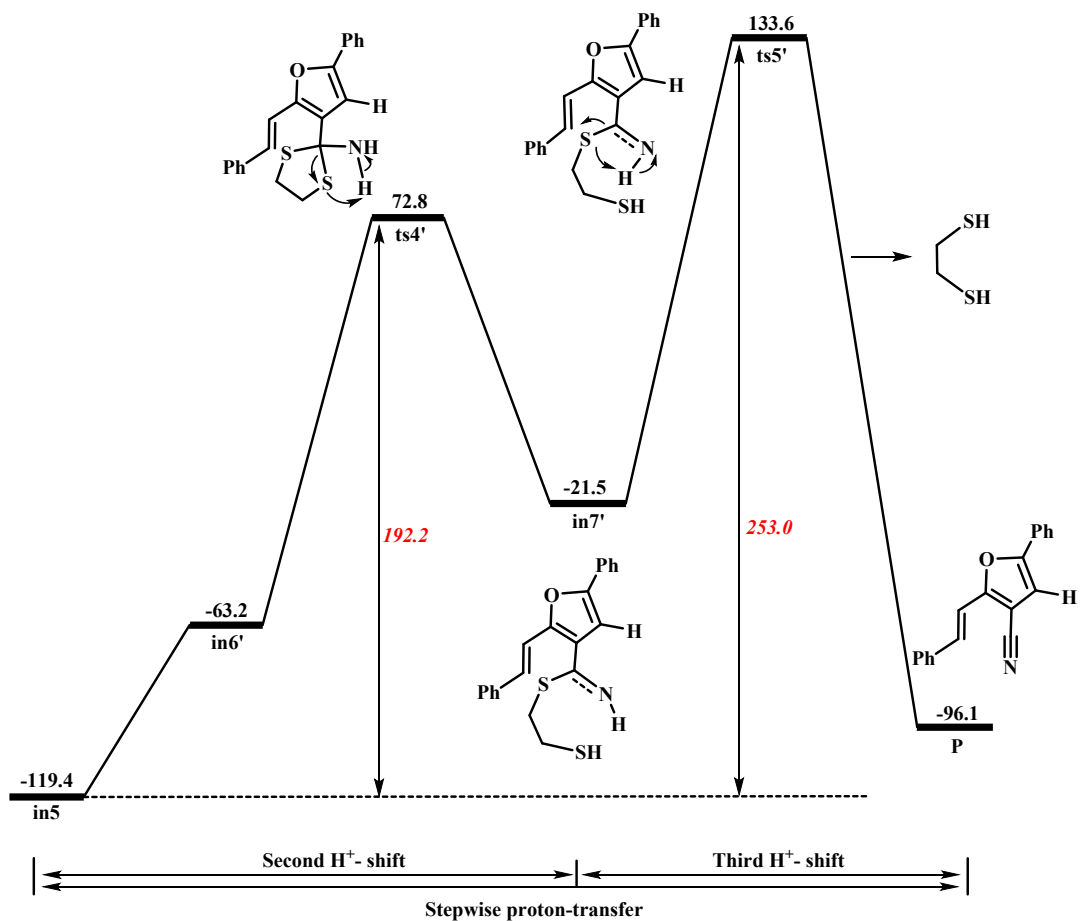

Figure S1. DFT-computed energy profile for the proton-transfer reactions in the absence of CuBr.

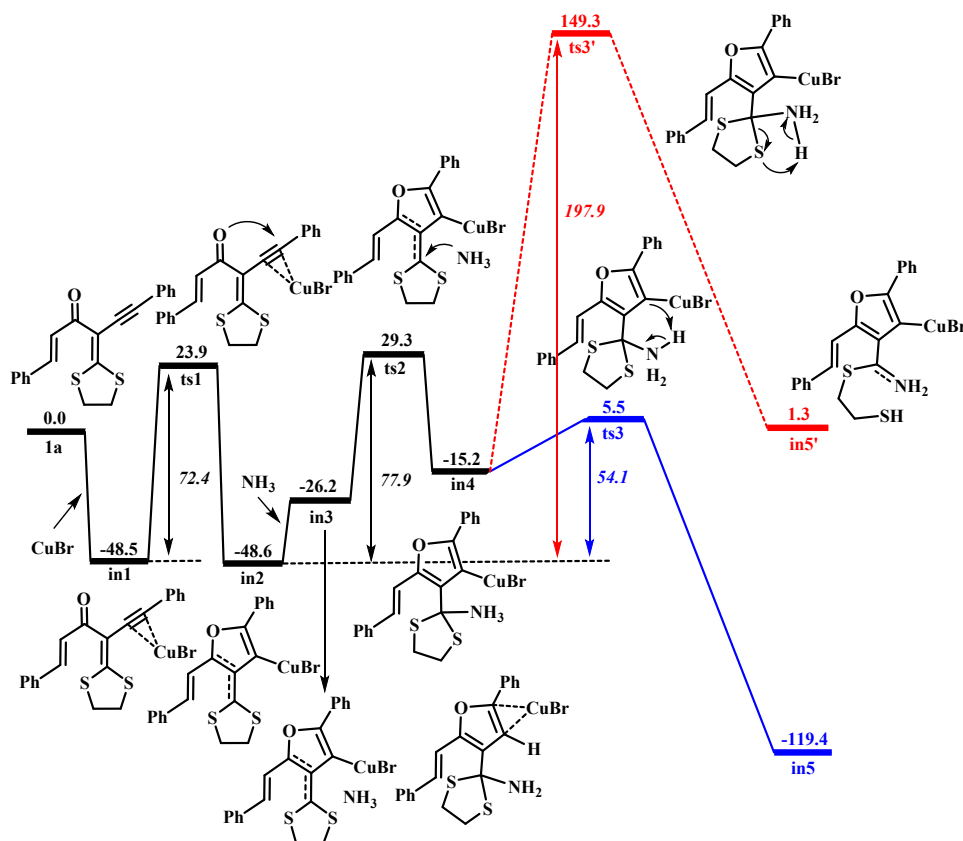

Figure S2. Comparing the free energy barriers of **ts3'** vs. **ts3**.

Based on the Arrhenius equation (K. J. Laidler, *J. Chem. Educ.*, 1984, **61**(6), 494-498; S. R. Logan, *J. Chem. Educ.*, 1982, **59**(4), 279-281),

$$\mathbf{in5/in5'} = \exp(-\Delta G_{ts3}/RT) / \exp(-\Delta G_{ts3'}/RT) \dots \dots \dots \mathbf{Eq\ S1}$$

$$\mathbf{in5/in5'} = \exp[(\Delta G_{ts3'} - \Delta G_{ts3})/RT] \dots \dots \dots \mathbf{Eq\ S2}$$

$\Delta G_{ts3} = 54.1$  kJ/mol;  $\Delta G_{ts3'} = 197.9$  kJ/mol;  $R = 8.314$  J/mol·K;  $T = 383.15$  K.

$\Delta G_{ts3}$  and  $\Delta G_{ts3'}$  are the free energy barriers of **ts3** and **ts3'**.

Theoretical calculation result (yields),

$$\mathbf{in5/in5'} = 4.03 \times 10^{19}:1$$

An **in5/in5'** = **4.03 × 10<sup>19</sup>:1** is predicted by the theoretical calculations based on the energy difference of **ts3** and **ts3'**, and the similar calculations have been widely reported in previous literatures (H. Han, T. Zhang, S.-D. Yang, Y. Lan and J.-B. Xia, *Org. Lett.*, 2019, **21**, 1749-1754; H. Jiang, Q. Li, Q. Qi, C. Yang and D. Zhang, *Chinese J. Org. Chem.*, 2018, **38**, 825-831; Z. Yu, T. Zhang, R. Bai and Y. Lan, *Catal. Sci. Technol.*, 2019, **9**, 646-651; D. Wei, Q. Liu, L. Sun, S.-J. Li, X. Li, L.-B. Qu and Y. Lan, *Chem. -Asian J.*, 2019 (<https://doi.org/10.1002/asia.201900076>)). Therefore, the formation of **in5'** is quite disadvantageous when compared with that of **in5** (**in5/in5'** = **4.03 × 10<sup>19</sup>:1**).

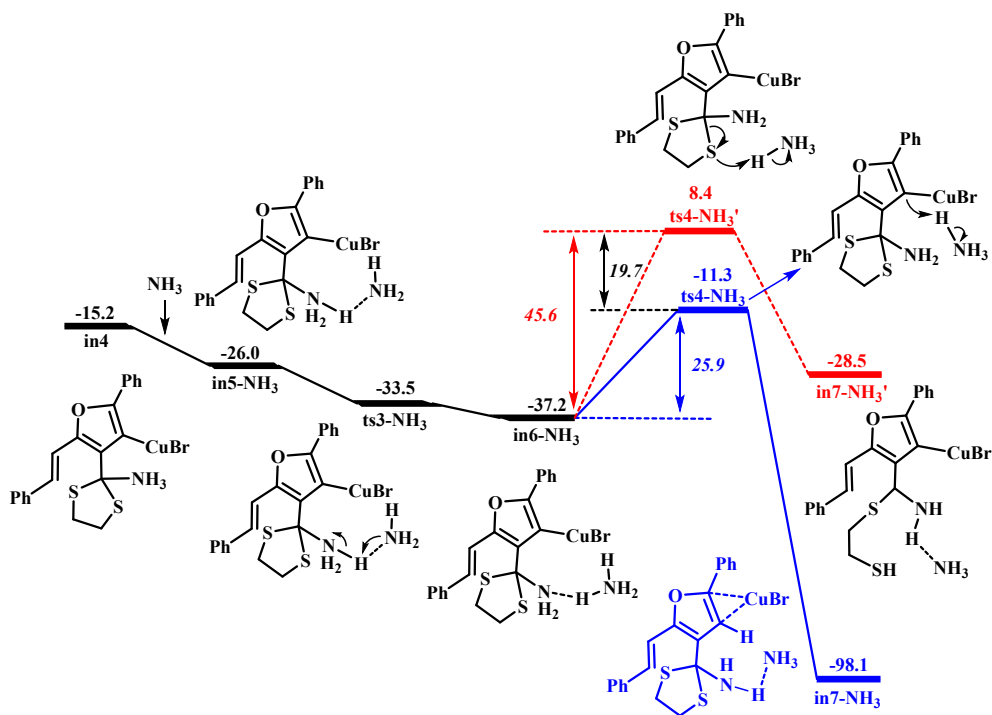

Figure S3. Comparing the free energy barriers of **ts4-NH<sub>3</sub>'** vs. **ts4-NH<sub>3</sub>**.

Based on the Arrhenius equation (K. J. Laidler, *J. Chem. Educ.*, 1984, **61**(6), 494-498; S. R. Logan, *J. Chem. Educ.*, 1982, **59**(4), 279-281),

$$\mathbf{in7-NH_3/in7-NH_3'} = \exp(-\Delta G_{ts4-NH_3}/RT) / \exp(-\Delta G_{ts4-NH_3'}/RT) \dots \dots \dots \mathbf{Eq\ S3}$$

$$\mathbf{in7-NH_3/in7-NH_3'} = \exp[(\Delta G_{ts4-NH_3'} - \Delta G_{ts4-NH_3})/RT] \dots \dots \dots \mathbf{Eq\ S4}$$

$\Delta G_{ts4-NH_3} = 25.9$  kJ/mol;  $\Delta G_{ts4-NH_3'} = 45.6$  kJ/mol;  $R = 8.314$  J/mol·K;  $T = 383.15$  K.

$\Delta G_{ts4-NH_3}$  and  $\Delta G_{ts4-NH_3'}$  are the free energy barriers of **ts4-NH<sub>3</sub>** and **ts4-NH<sub>3</sub>'**.

Theoretical calculation result (yields),

$$\mathbf{in7-NH_3/in7-NH_3'} = \mathbf{493:1}$$

An **in7-NH<sub>3</sub>/in7-NH<sub>3</sub>'=493:1** is predicted by the theoretical calculations based on the energy difference of **ts4-NH<sub>3</sub>** and **ts4-NH<sub>3</sub>'**, and the similar calculations have been widely reported in previous literatures (H. Han, T. Zhang, S.-D. Yang, Y. Lan and J.-B. Xia, *Org. Lett.*, 2019, **21**, 1749-1754; H. Jiang, Q. Li, Q. Qi, C. Yang and D. Zhang, *Chinese J. Org. Chem.*, 2018, **38**, 825-831; Z. Yu, T. Zhang, R. Bai and Y. Lan, *Catal. Sci. Technol.*, 2019, **9**, 646-651; D. Wei, Q. Liu, L. Sun, S.-J. Li, X. Li, L.-B. Qu and Y. Lan, *Chem. -Asian J.*, 2019 (<https://doi.org/10.1002/asia.201900076>)). Therefore, the formation of **in7-NH<sub>3</sub>'** is quite disadvantageous when compared with that of **in7-NH<sub>3</sub>** (**in7-NH<sub>3</sub>/in7-NH<sub>3</sub>'=493:1**).

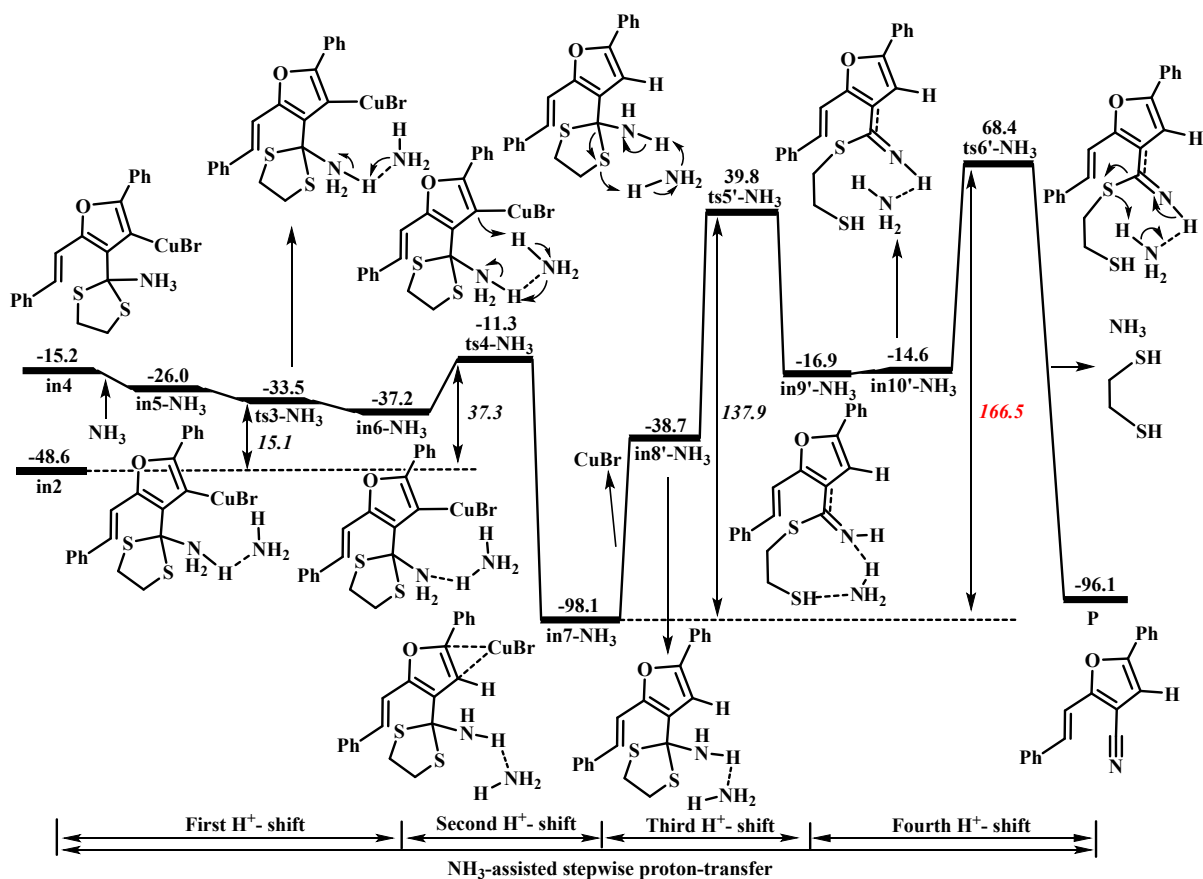

Figure S4. DFT-computed energy profile for the  $\text{NH}_3$ -assisted proton-transfer reactions.



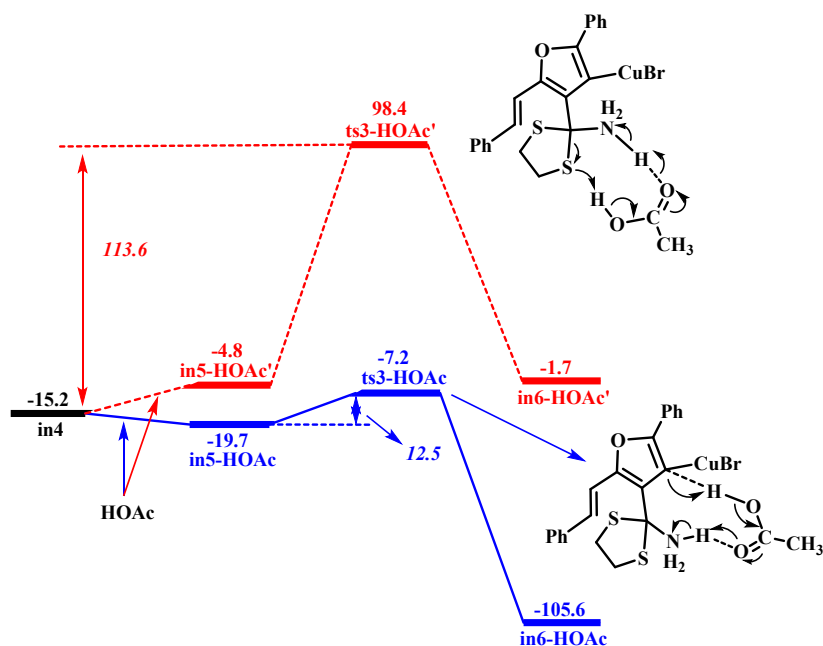

Figure S5. Comparing the free energy barriers of **ts3-HOAc'** vs. **ts3-HOAc**.

Based on the Arrhenius equation (K. J. Laidler, *J. Chem. Educ.*, 1984, **61**(6), 494-498; S. R. Logan, *J. Chem. Educ.*, 1982, **59**(4), 279-281),

$$\text{in6-HOAc}/\text{in6-HOAc}' = \exp(-\Delta G_{\text{ts3-HOAc}}/RT) / \exp(-\Delta G_{\text{ts3-HOAc}'}/RT) \dots \text{Eq S5}$$

$$\text{in6-HOAc}/\text{in6-HOAc}' = \exp[(\Delta G_{\text{ts3-HOAc}} - \Delta G_{\text{ts3-HOAc}'})/RT] \dots \text{Eq S6}$$

$\Delta G_{\text{ts3-HOAc}} = 12.5$  kJ/mol;  $\Delta G_{\text{ts3-HOAc}'} = 113.6$  kJ/mol;  $R = 8.314$  J/mol·K;  $T = 383.15$  K.

$\Delta G_{\text{ts3-HOAc}}$  and  $\Delta G_{\text{ts3-HOAc}'}$  are the free energy barriers of **ts3-HOAc** and **ts3-HOAc'**.

Theoretical calculation result (yields),

$$\text{in6-HOAc}/\text{in6-HOAc}' = 5.8 \times 10^{13}:1$$

An **in6-HOAc/in6-HOAc'** =  $5.8 \times 10^{13}:1$  is predicted by the theoretical calculations based on the energy difference of **ts3-HOAc** and **ts3-HOAc'**, and the similar calculations have been widely reported in previous literatures (H. Han, T. Zhang, S.-D. Yang, Y. Lan and J.-B. Xia, *Org. Lett.*, 2019, **21**, 1749-1754; H. Jiang, Q. Li, Q. Qi, C. Yang and D. Zhang, *Chinese J. Org. Chem.*, 2018, **38**, 825-831; Z. Yu, T. Zhang, R. Bai and Y. Lan, *Catal. Sci. Technol.*, 2019, **9**, 646-651; D. Wei, Q. Liu, L. Sun, S.-J. Li, X. Li, L.-B. Qu and Y. Lan, *Chem. -Asian J.*, 2019 (<https://doi.org/10.1002/asia.201900076>)). Therefore, the formation of **in6-HOAc'** is quite disadvantageous when compared with that of **in6-HOAc** (**in6-HOAc/in6-HOAc'** =  $5.8 \times 10^{13}:1$ ).

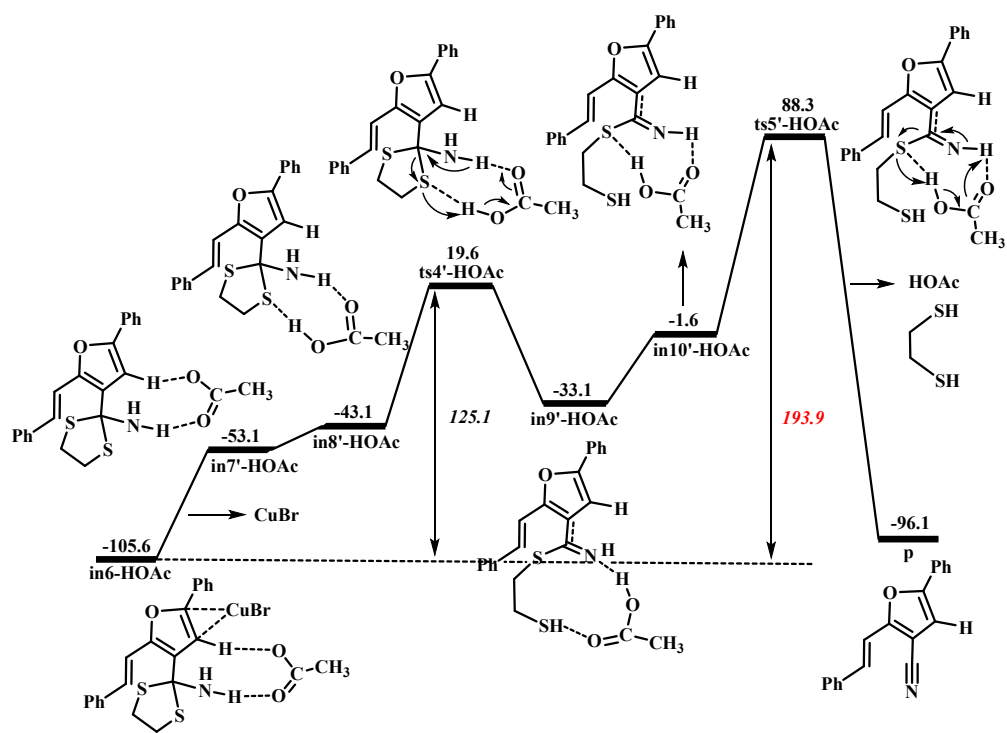

Figure S6. DFT-computed energy profile for the HOAc-assisted proton-transfer reactions in the absence of CuBr.

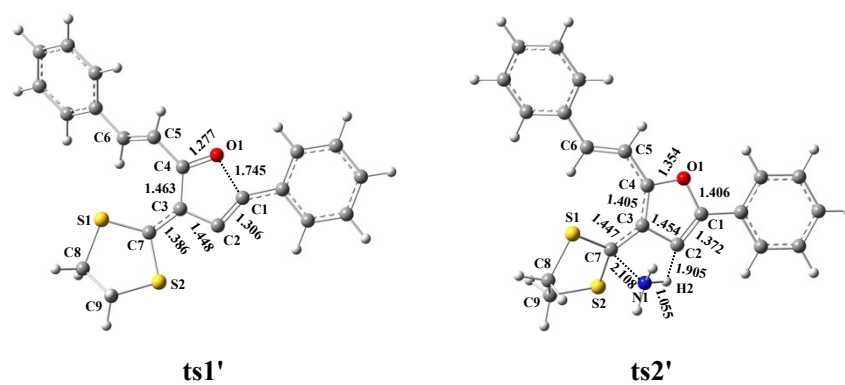

Figure S7. Optimized geometries involved in the intramolecular cycloaddition and the intermolecular addition in the absence of CuBr.

Scheme S1. The coordination effects of NH<sub>3</sub> with CuBr on the process of intramolecular cyclization.

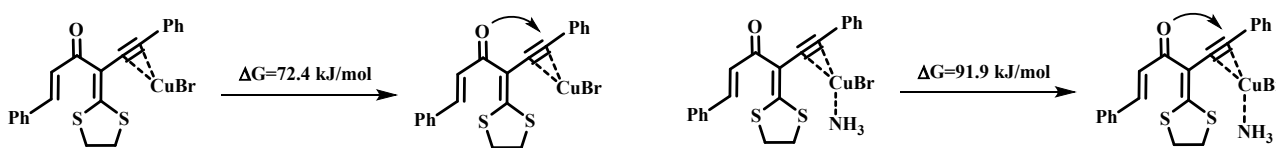

The influence of NH<sub>3</sub> on the intramolecular cyclization is considered. The molecule of NH<sub>3</sub> as a ligand coordinates with the metal catalyst CuBr, but the participation of NH<sub>3</sub> do not alter the reaction mechanism of intramolecular cyclization process (see Scheme S1). In the present situations, the activation free energy of CuBr(NH<sub>3</sub>)-catalyzed reaction is 91.9 kJ/mol, which is 19.5 kJ/mol higher than that of CuBr-catalyzed case without NH<sub>3</sub> as the ligand. This means that the effect of NH<sub>3</sub> on the process of intramolecular cyclization is negative.

Scheme S2. The effects of NH<sub>3</sub> (as the proton shuttle or the catalyst ligand) on the proton-transfer process.

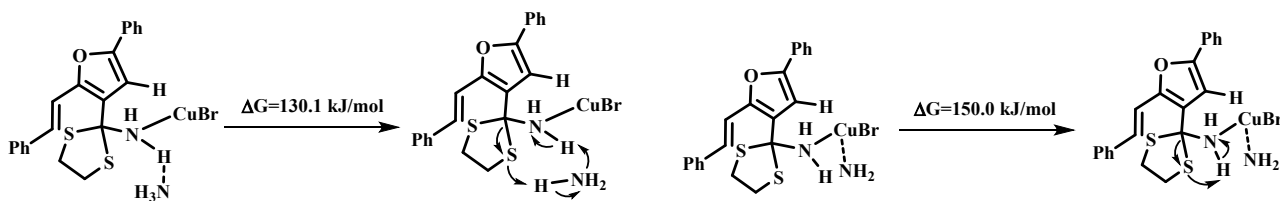

The influence of NH<sub>3</sub> on the proton-transfer process is also considered. As shown in Figures 1 vs. 3, NH<sub>3</sub> as the proton shuttle can assist proton-transfer by reducing the rate-determining free energy barrier of whole Cu(I)-catalyzed reactions. In addition, the calculation shows that the molecule of NH<sub>3</sub> (as a ligand) coordinated with the metal catalyst CuBr can also promote proton-transfer reaction (160.8 vs. 150.0 kJ/mol, see Figure 1 vs. Scheme S2). However, the activation free energy of CuBr(NH<sub>3</sub>)-catalyzed proton-transfer process is 150.0 kJ/mol, which is 19.9 kJ/mol higher than that of CuBr-catalyzed case with NH<sub>3</sub> as the proton shuttle (see Scheme S2). It should be noted that 150.0 kJ/mol is higher than the rate-determining free energy barrier of whole Cu(I)-catalyzed reactions (130.1 kJ/mol, see Figures 1 and 3). Therefore, the roles of NH<sub>3</sub> as the ligand is unfavorable when compared with that of NH<sub>3</sub> as the proton shuttle.

## Intrinsic Reaction Coordinates

When the animation of transition state's vibrations cannot easily confirm the reliability of transition states, the intrinsic reaction coordinate (IRC) calculations is conducted to unambiguously identify the transition states, which are connected with the reactants and the products.

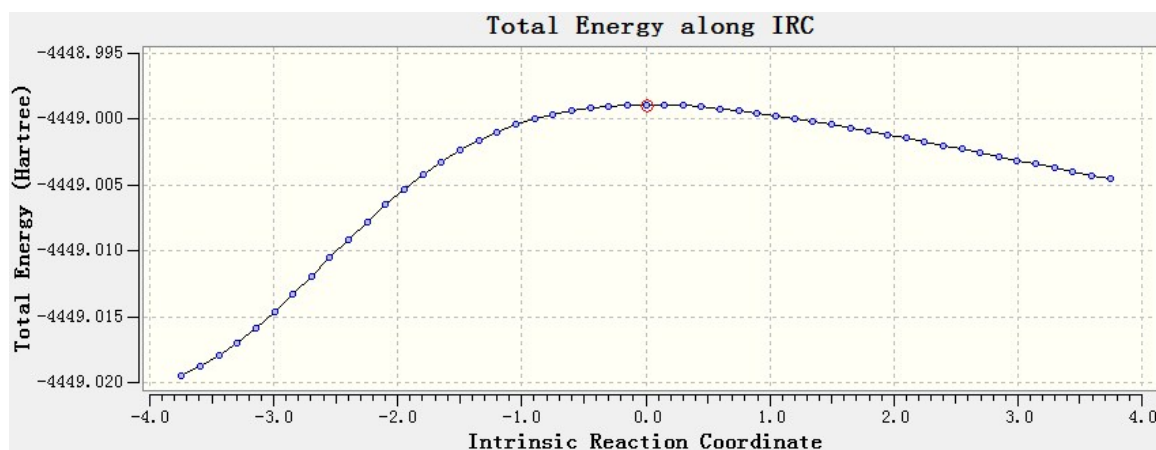

Figure S8. IRC of **ts1**.

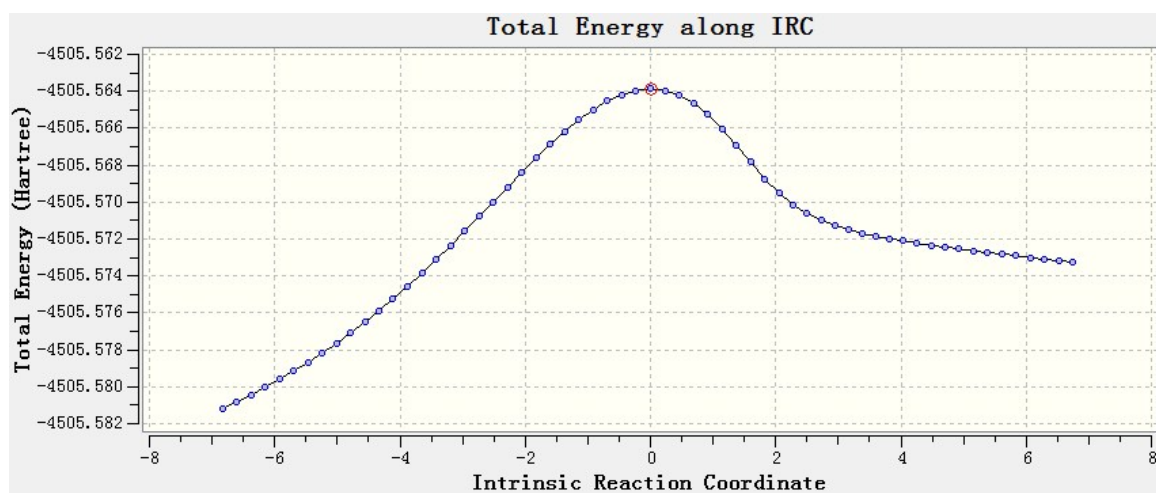

Figure S9. IRC of **ts2**.

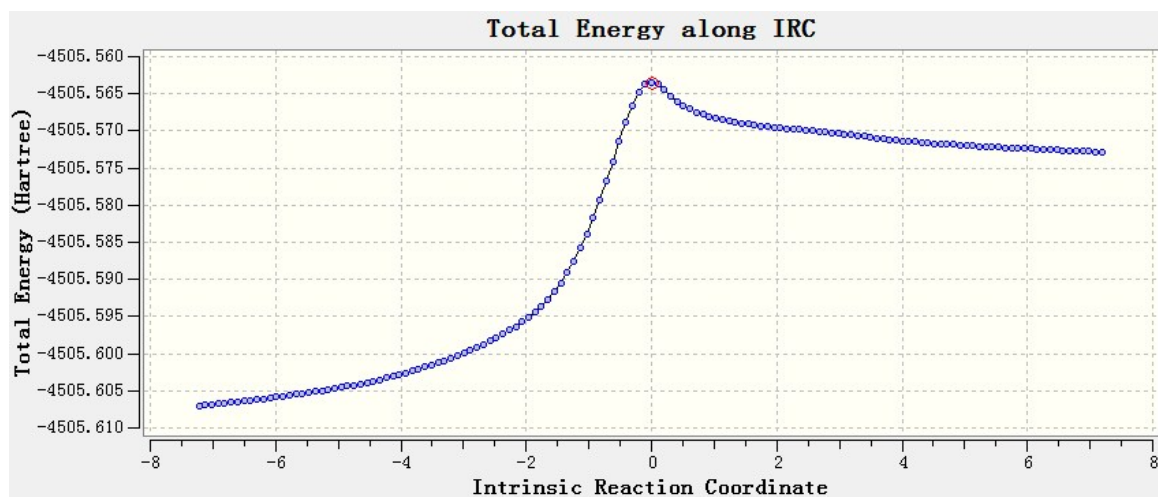

Figure S10. IRC of **ts3**.



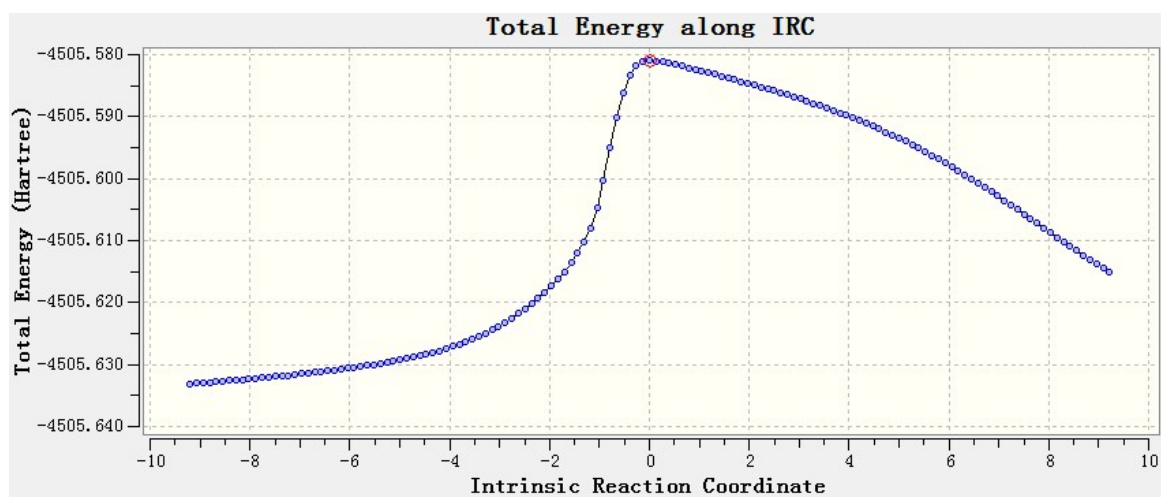

Figure S11. IRC of **ts4**.

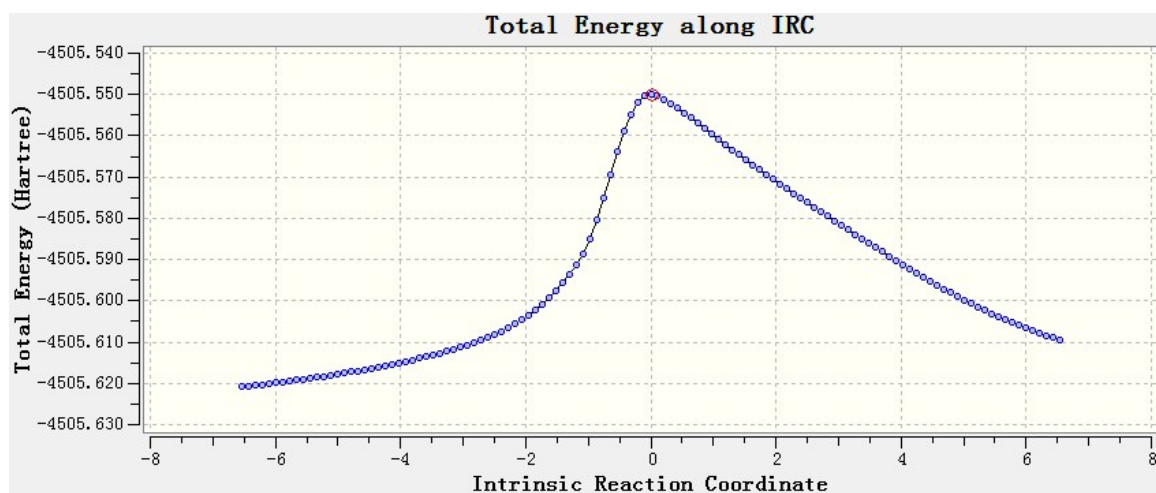

Figure S12. IRC of **ts5**.

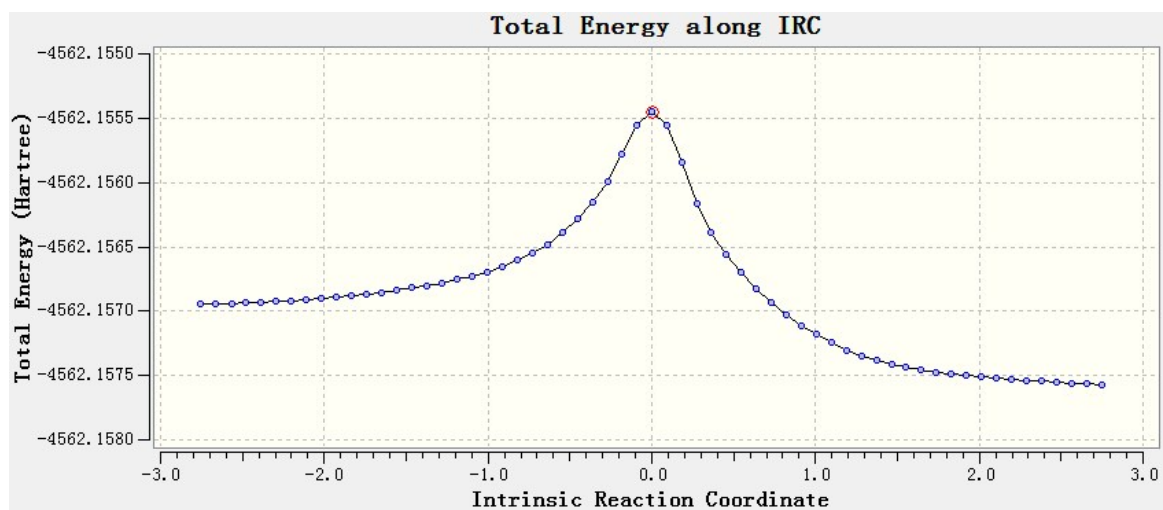

Figure S13. IRC of **ts3-NH<sub>3</sub>**.

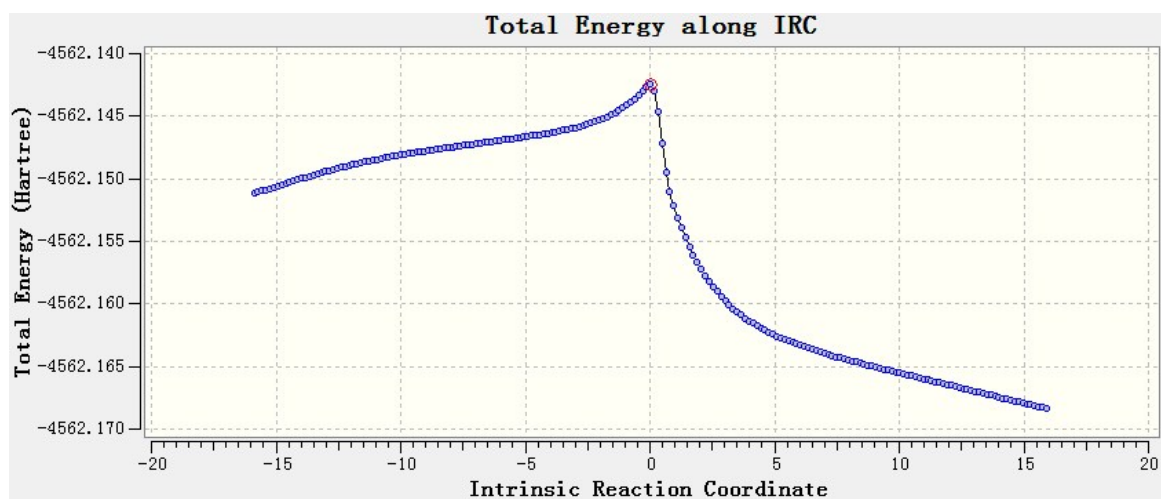

Figure S14. IRC of  $\text{ts4-NH}_3$ .

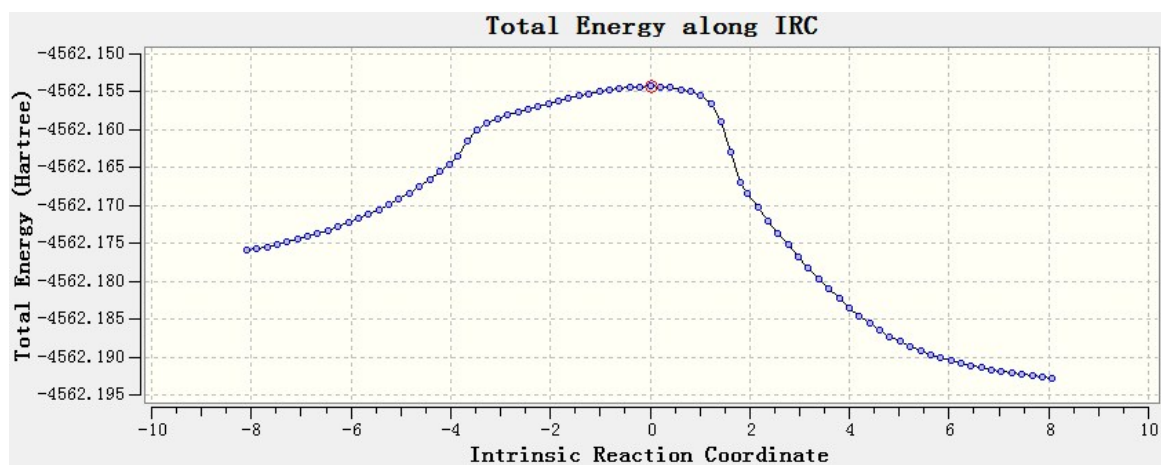

Figure S15. IRC of  $ts5-NH_3$ .

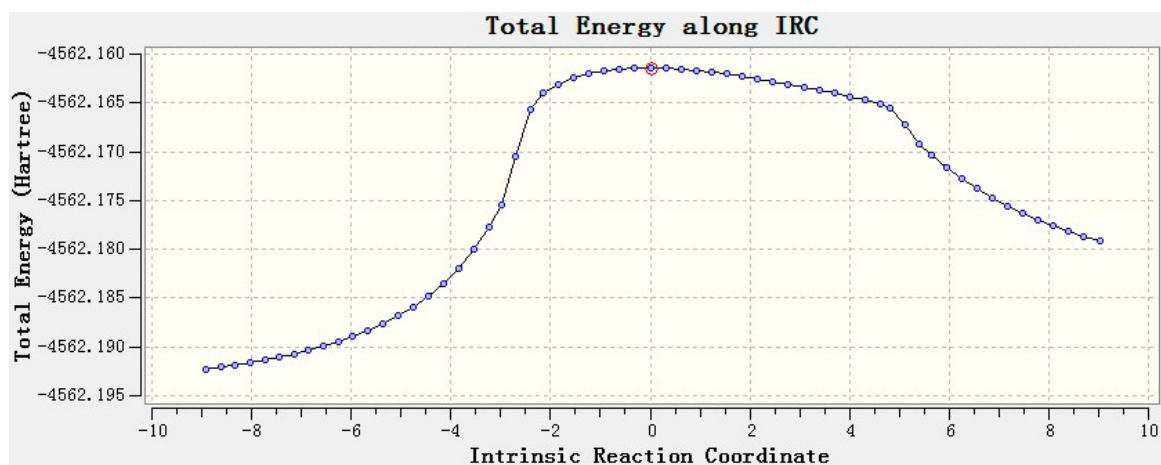

Figure S16. IRC of ts6-NH<sub>3</sub>.

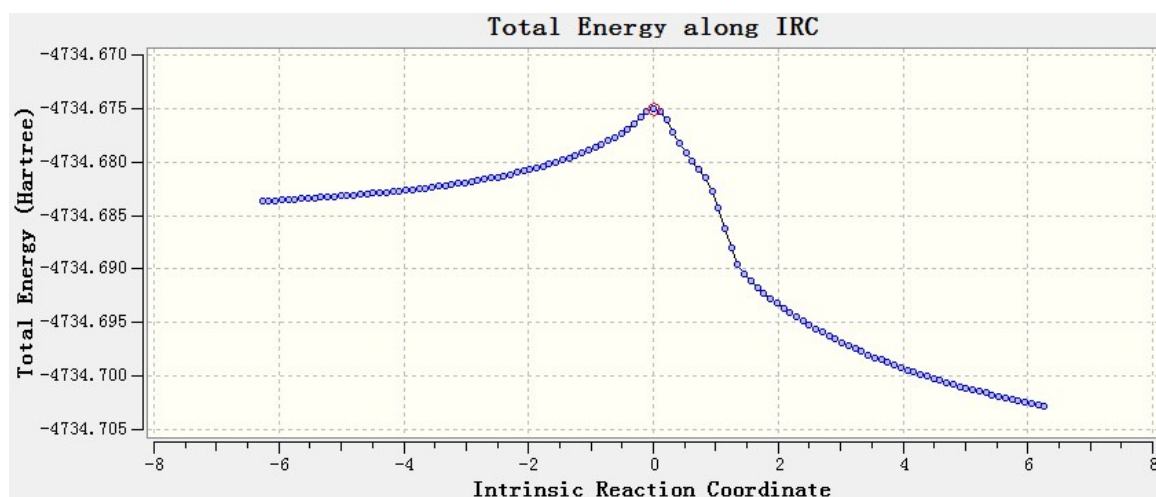

Figure S17. IRC of ts3-HOAc.

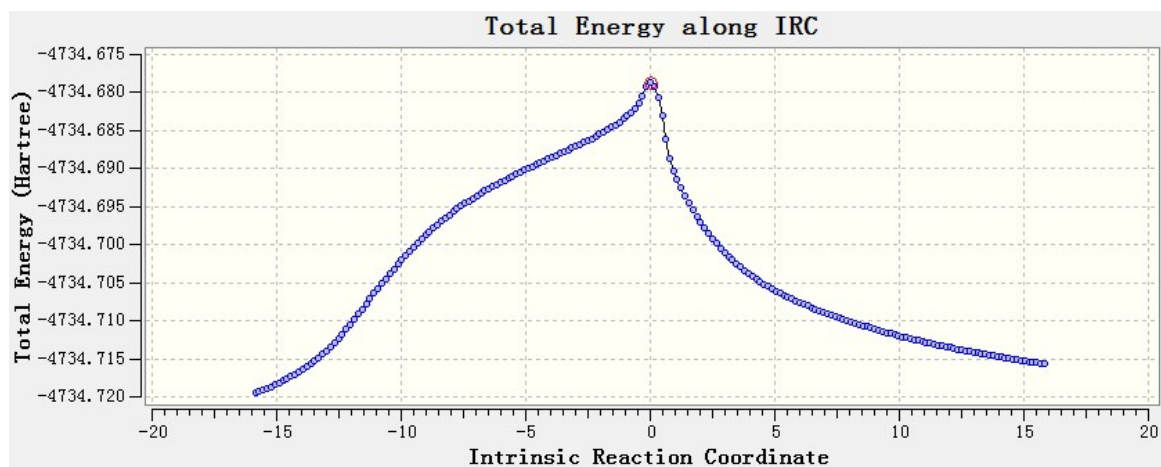

Figure S18. IRC of **ts4-HOAc**.



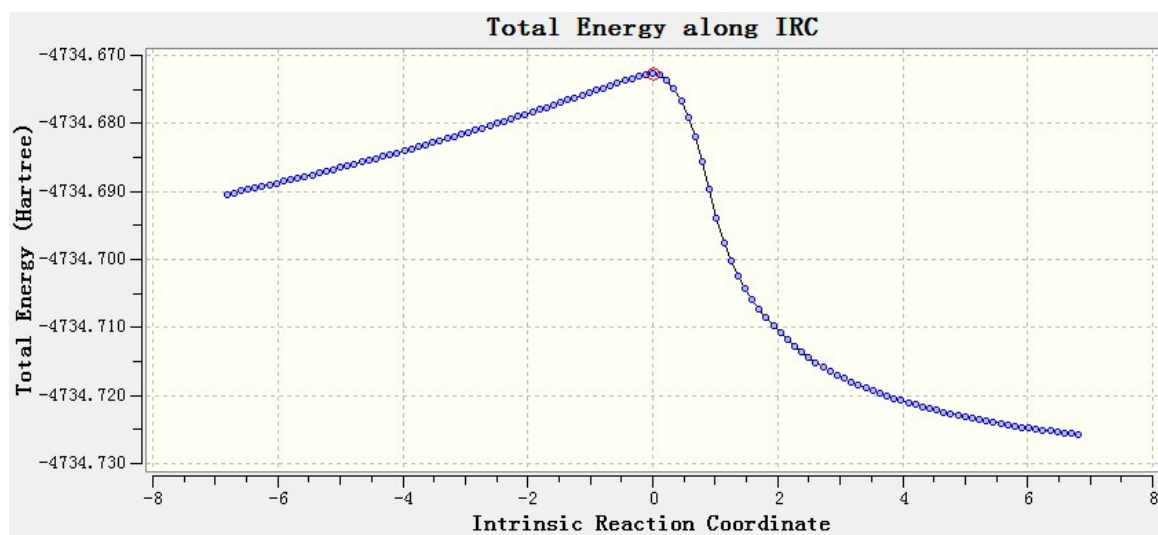

Figure S19. IRC of **ts5-HOAc**.

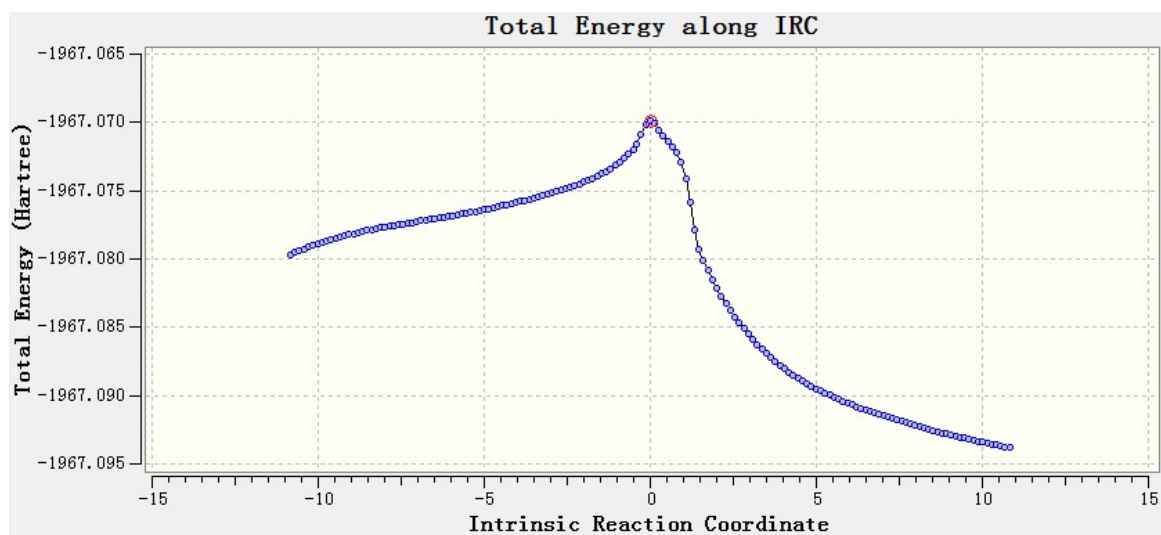

Figure S20. IRC of  $ts5'-NH_3$ .

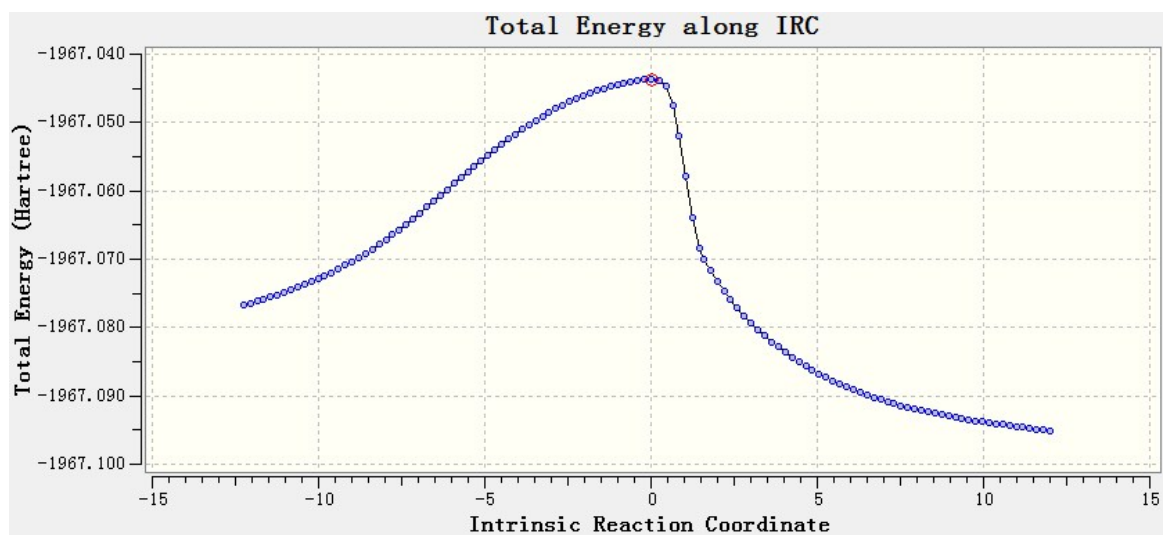

Figure S21. IRC of  $\text{ts6}'\text{-NH}_3$ .

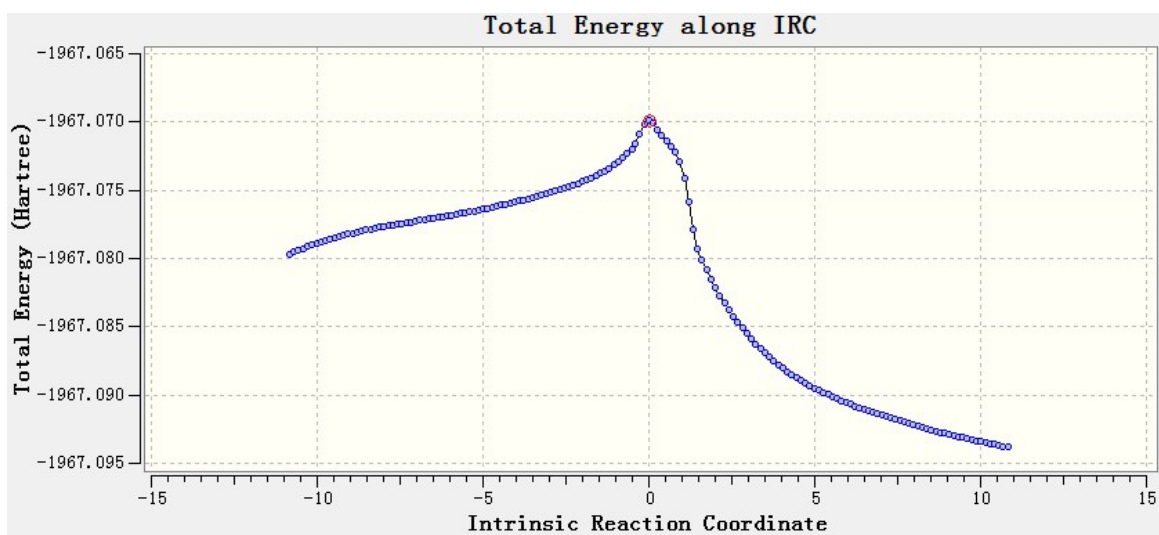

Figure S22. IRC of ts4'-HOAc.

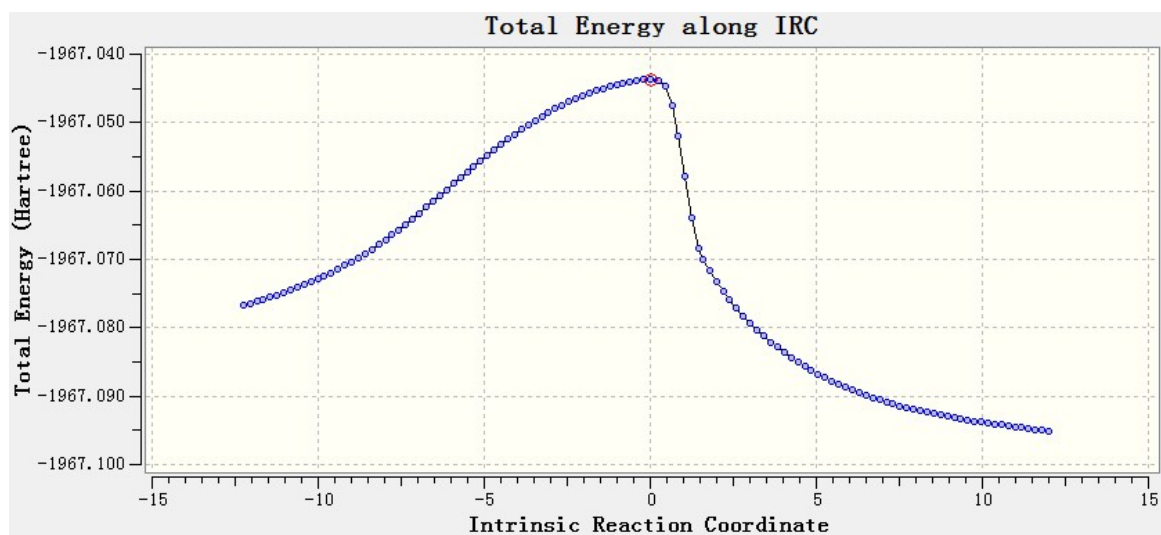

Figure S23. IRC of ts5'-HOAc.

## Cartesian coordinates of the optimized stationary points on the optimal reaction channels

The solution-phase Gibbs free energy is determined by adding the solvation single-point energy (energy) and gas-phase thermal correction to the Gibbs free energy obtained from vibrational frequency calculation. Unless special emphasis, all the discussed energies are relative solution-phase Gibbs free energies ( $G_{\text{rel}}$ , kJ/mol) in this paper.

### **CuBr**

|    |            |            |             |
|----|------------|------------|-------------|
| Cu | 0.00000000 | 0.00000000 | -1.21848100 |
| Br | 0.00000000 | 0.00000000 | 1.00959800  |

B3LYP/6-31G\* (Lanl2DZ for Cu)

Thermal correction to Gibbs Free Energy = -0.023804 a.u.

Sum of electronic and thermal Free Energies = -2767.620687 a.u.

M06-2x/6-311++G\*\* (Lanl2DZ for Cu)

Energy = -2770.4213814 a.u.

No imaginary frequency

### **1a**

|   |             |             |             |
|---|-------------|-------------|-------------|
| O | -1.55681200 | -2.97115600 | -0.80413800 |
| C | -0.82937900 | -2.00694400 | -0.53461300 |
| C | 0.63253500  | -2.22983900 | -0.52965100 |
| C | 1.56292500  | -1.52392500 | 0.14346100  |
| C | 2.99896400  | -1.81076800 | 0.21953600  |
| C | 3.60705000  | -2.90945000 | -0.41849000 |
| C | 4.97732100  | -3.12325600 | -0.31458500 |
| C | 5.77605300  | -2.24727200 | 0.42808900  |
| C | 5.19041600  | -1.15416800 | 1.06755700  |
| C | 3.81712400  | -0.94058700 | 0.96385800  |
| C | -1.45192900 | -0.69183100 | -0.23317000 |
| C | -2.81612100 | -0.64234800 | -0.01384600 |
| C | -0.71061200 | 0.51775800  | -0.22347400 |
| C | -0.11387200 | 1.58050900  | -0.22391900 |
| C | 0.61923200  | 2.80114100  | -0.22495000 |
| C | 1.98929100  | 2.81277000  | -0.56048100 |
| C | 2.70473300  | 4.00691300  | -0.55489700 |
| C | 2.07331400  | 5.20745100  | -0.21963900 |
| C | 0.71598600  | 5.20663700  | 0.11205300  |
| C | -0.00824100 | 4.01794200  | 0.11175400  |
| S | -3.88225600 | -2.04419800 | -0.06267800 |
| C | -5.32144800 | -1.16411000 | 0.69042100  |
| C | -5.31786600 | 0.27438700  | 0.20230200  |
| S | -3.59740900 | 0.90037900  | 0.35322600  |

|   |             |             |             |
|---|-------------|-------------|-------------|
| H | 0.89856700  | -3.14012400 | -1.06154600 |
| H | 1.24613100  | -0.64834400 | 0.70217700  |
| H | 3.00325100  | -3.60134500 | -0.99771600 |
| H | 5.42714200  | -3.97738100 | -0.81367700 |
| H | 6.84609700  | -2.41886200 | 0.50710300  |
| H | 5.80155400  | -0.46837600 | 1.64808800  |
| H | 3.36339600  | -0.08791500 | 1.46371800  |
| H | 2.47804100  | 1.87968900  | -0.82445500 |
| H | 3.75962700  | 4.00098900  | -0.81619500 |
| H | 2.63490100  | 6.13759800  | -0.21814200 |
| H | 0.21903000  | 6.13731900  | 0.37274500  |
| H | -1.06279100 | 4.01456300  | 0.36974100  |
| H | -5.24317300 | -1.21213800 | 1.78112800  |
| H | -6.22524300 | -1.69560300 | 0.37615800  |
| H | -5.95609900 | 0.91898200  | 0.81405100  |
| H | -5.63415200 | 0.34523400  | -0.84274800 |

B3LYP/6-31G\*

Thermal correction to Gibbs Free Energy = 0.252113 a.u.

Sum of electronic and thermal Free Energies = -1681.148639 a.u.

M06-2x/6-311++G\*\*

Energy = -1681.255519 a.u.

No imaginary frequency

### 2a (NH<sub>4</sub>OAc)

|   |             |             |             |
|---|-------------|-------------|-------------|
| C | 2.21572700  | -0.27190900 | 0.00014900  |
| C | 0.75412800  | 0.12300700  | -0.00021600 |
| O | 0.36366200  | 1.28324800  | -0.00009500 |
| O | -0.05532700 | -0.93329200 | -0.00021500 |
| H | 2.43801000  | -0.88618400 | -0.87890400 |
| H | 2.84634300  | 0.61817700  | -0.00425100 |
| H | 2.43931600  | -0.87787300 | 0.88468700  |
| H | -1.03680400 | -0.61521700 | 0.00009400  |
| N | -2.59572100 | -0.06736200 | 0.00018900  |
| H | -3.15304500 | -0.31163300 | -0.81759500 |
| H | -2.49680100 | 0.94723400  | -0.00133700 |
| H | -3.15278000 | -0.30920700 | 0.81886700  |

B3LYP/6-31G\*

Thermal correction to Gibbs Free Energy = 0.066130 a.u.

Sum of electronic and thermal Free Energies = -285.596061 a.u.

M06-2x/6-311++G\*\*

Energy = -285.6406062 a.u.

No imaginary frequency

### NH<sub>3</sub>

|   |            |             |             |
|---|------------|-------------|-------------|
| N | 0.00001000 | -0.00000300 | -0.11941800 |
|---|------------|-------------|-------------|

|   |             |             |            |
|---|-------------|-------------|------------|
| H | -0.52505100 | -0.77789500 | 0.27863600 |
| H | -0.41124100 | 0.84361300  | 0.27862800 |
| H | 0.93622300  | -0.06569600 | 0.27866200 |

B3LYP/6-31G\*

Thermal correction to Gibbs Free Energy = 0.015453 a.u.

Sum of electronic and thermal Free Energies = -56.532494 a.u.

M06-2x/6-311++G\*\*

Energy = -56.5517822 a.u.

No imaginary frequency

HOAc

|   |             |             |             |
|---|-------------|-------------|-------------|
| C | 1.39724800  | -0.11046200 | -0.00003500 |
| C | -0.09224200 | 0.12592600  | -0.00012300 |
| O | -0.64489100 | 1.20239900  | 0.00002100  |
| O | -0.77916500 | -1.04652700 | -0.00002000 |
| H | 1.68391700  | -0.69573500 | -0.87991500 |
| H | 1.91786900  | 0.84728300  | -0.00358500 |
| H | 1.68445700  | -0.68904000 | 0.88414200  |
| H | -1.72382600 | -0.80227500 | 0.00029800  |

B3LYP/6-31G\*

Thermal correction to Gibbs Free Energy = 0.034759 a.u.

Sum of electronic and thermal Free Energies = -229.047028 a.u.

M06-2x/6-311++G\*\*

Energy = -229.0719316 a.u.

No imaginary frequency

No cocatalysts (NH<sub>3</sub> and HOAc)

**in1**

|   |             |             |             |
|---|-------------|-------------|-------------|
| O | 0.62042900  | 0.94627600  | -1.77343500 |
| C | 1.01752400  | 0.00822800  | -1.09259100 |
| C | 2.45694300  | -0.14200500 | -0.81147900 |
| C | 2.96047300  | -0.74816000 | 0.28535500  |
| C | 4.36254700  | -0.82142900 | 0.69548400  |
| C | 5.42147400  | -0.30979900 | -0.08071700 |
| C | 6.73658500  | -0.41032000 | 0.35994900  |
| C | 7.02669100  | -1.02224600 | 1.58464400  |
| C | 5.98980700  | -1.53552600 | 2.36546800  |
| C | 4.67227200  | -1.43663900 | 1.92301900  |
| C | 0.00591500  | -0.96317200 | -0.50905000 |
| C | 0.12822900  | -2.32688200 | -0.51729200 |
| S | 1.42910600  | -3.26829700 | -1.26726200 |
| C | 0.67309900  | -4.92436900 | -0.96358000 |
| C | -0.84186900 | -4.77133200 | -0.88314900 |
| S | -1.15309600 | -3.32331900 | 0.20134300  |



|    |             |             |             |
|----|-------------|-------------|-------------|
| H  | 3.08840400  | 0.41108800  | -1.50177900 |
| H  | 2.26003200  | -1.22768600 | 0.96706900  |
| H  | 5.21411400  | 0.16540900  | -1.03463300 |
| H  | 7.54084300  | -0.01109800 | -0.25174400 |
| H  | 8.05558400  | -1.09737600 | 1.92537300  |
| H  | 6.20649100  | -2.01205800 | 3.31739700  |
| H  | 3.86571700  | -1.83681700 | 2.53273800  |
| H  | 1.07814300  | -5.33601800 | -0.03521900 |
| H  | 0.96684100  | -5.56770100 | -1.79842000 |
| H  | -1.31358500 | -5.64123300 | -0.41827500 |
| H  | -1.29049700 | -4.59395400 | -1.86391200 |
| C  | -1.21519900 | -0.34054600 | -0.10858500 |
| C  | -2.08505500 | 0.51606400  | 0.12760900  |
| C  | -2.81888900 | 1.73988100  | 0.26795300  |
| C  | -2.22831500 | 2.91001800  | -0.25623200 |
| C  | -2.88714100 | 4.12939100  | -0.13456300 |
| C  | -4.13130700 | 4.19792200  | 0.50018900  |
| C  | -4.72015200 | 3.03876500  | 1.01188200  |
| C  | -4.07375200 | 1.81011800  | 0.90025400  |
| H  | -1.26765400 | 2.83768800  | -0.75673600 |
| H  | -2.43035800 | 5.02798300  | -0.53987300 |
| H  | -4.64235000 | 5.15250600  | 0.59101400  |
| H  | -5.69000600 | 3.08865900  | 1.49844300  |
| H  | -4.53558900 | 0.90377100  | 1.28125200  |
| Cu | -2.98501700 | -1.39474200 | 0.36749200  |
| Br | -5.05225500 | -2.13662700 | 1.00017300  |

B3LYP/6-31G\* (Lan12DZ for Cu)

Thermal correction to Gibbs Free Energy = 0.245585 a.u.

Sum of electronic and thermal Free Energies = -4448.770019 a.u.

M06-2x/6-311++G\*\* (Lan12DZ for Cu)

Energy = -4451.7127004 a.u.

No imaginary frequency

**ts1**

|   |            |             |             |
|---|------------|-------------|-------------|
| O | 0.57782600 | 2.18512500  | -0.63419200 |
| C | 1.20413500 | 1.11039600  | -0.52816500 |
| C | 2.67336500 | 1.19716500  | -0.55940100 |
| C | 3.46502400 | 0.59934700  | 0.35372500  |
| C | 4.91153100 | 0.75449900  | 0.51335300  |
| C | 5.69766000 | 1.57596100  | -0.31844300 |
| C | 7.07110700 | 1.67501500  | -0.12385100 |
| C | 7.69255400 | 0.95917300  | 0.90559900  |
| C | 6.92810700 | 0.14241800  | 1.74002200  |
| C | 5.55189200 | 0.04260800  | 1.54458900  |
| C | 0.39426600 | -0.11705500 | -0.34369200 |

|    |             |             |             |
|----|-------------|-------------|-------------|
| C  | 0.78592900  | -1.43388300 | -0.50008700 |
| S  | 2.36154500  | -2.01165100 | -1.05981700 |
| C  | 2.01725100  | -3.80144600 | -0.81495800 |
| C  | 0.53918100  | -4.03837000 | -1.07568700 |
| S  | -0.39522700 | -2.71237500 | -0.21361900 |
| H  | 3.06232400  | 1.93675500  | -1.25366300 |
| H  | 2.99617400  | -0.06768400 | 1.07462600  |
| H  | 5.23241000  | 2.14130100  | -1.12033600 |
| H  | 7.66178300  | 2.31366600  | -0.77470200 |
| H  | 8.76548900  | 1.04129300  | 1.05510400  |
| H  | 7.40208600  | -0.41531400 | 2.54282700  |
| H  | 4.95790100  | -0.59306900 | 2.19685500  |
| H  | 2.29367600  | -4.07943800 | 0.20613800  |
| H  | 2.65131900  | -4.34839900 | -1.51938200 |
| H  | 0.20174500  | -4.99436000 | -0.66500200 |
| H  | 0.30486500  | -4.00351200 | -2.14345600 |
| C  | -0.99724400 | 0.26031800  | -0.15540600 |
| C  | -1.34905500 | 1.49176700  | -0.23435000 |
| C  | -2.18271700 | 2.65067700  | -0.18639100 |
| C  | -1.90934600 | 3.78238000  | -0.98074300 |
| C  | -2.75273600 | 4.88751900  | -0.93067300 |
| C  | -3.88232200 | 4.87998400  | -0.10739300 |
| C  | -4.16090600 | 3.76034900  | 0.68050400  |
| C  | -3.31508900 | 2.65552200  | 0.65794700  |
| H  | -1.02995300 | 3.78279800  | -1.61340200 |
| H  | -2.53036500 | 5.75746800  | -1.54230800 |
| H  | -4.54152000 | 5.74310700  | -0.07912600 |
| H  | -5.03664600 | 3.74674700  | 1.32284100  |
| H  | -3.52980100 | 1.78581100  | 1.27074800  |
| Cu | -2.63202900 | -0.78985800 | 0.19213400  |
| Br | -4.54033900 | -1.91268400 | 0.67713900  |

B3LYP/6-31G\* (Lan12DZ for Cu)

Thermal correction to Gibbs Free Energy = 0.246400 a.u.

Sum of electronic and thermal Free Energies = -4448.752479 a.u.

M06-2x/6-311++G\*\* (Lan12DZ for Cu)

Energy = -4451.6859251 a.u.

Number of Imaginary Frequencies = 1

Lowest Frequency = 233.31*i*

**in2**

|   |             |             |             |
|---|-------------|-------------|-------------|
| O | -1.44933100 | -1.00764500 | 0.09113600  |
| C | -0.84214000 | 0.15579200  | -0.14435700 |
| C | -1.68901000 | 1.29325700  | 0.08272000  |
| C | -1.30977900 | 2.53682600  | 0.47158500  |
| C | -2.18832100 | 3.66597000  | 0.74931800  |

|    |             |             |             |
|----|-------------|-------------|-------------|
| C  | -3.57659400 | 3.65197500  | 0.49700100  |
| C  | -4.36242500 | 4.76100800  | 0.78820600  |
| C  | -3.78630900 | 5.91314000  | 1.33588600  |
| C  | -2.41333700 | 5.94719600  | 1.58737300  |
| C  | -1.62476900 | 4.83728600  | 1.29503900  |
| C  | 0.51369500  | -0.13194300 | -0.50457000 |
| C  | 1.49555400  | 0.72946600  | -1.02648900 |
| S  | 1.20864400  | 2.34402600  | -1.64088700 |
| C  | 2.97544500  | 2.76770000  | -1.91977300 |
| C  | 3.70100800  | 1.49097700  | -2.30681600 |
| S  | 3.11936300  | 0.13594100  | -1.19679500 |
| H  | -2.74668800 | 1.04685700  | 0.02642200  |
| H  | -0.25301200 | 2.73231500  | 0.62813200  |
| H  | -4.04086800 | 2.77264500  | 0.06093800  |
| H  | -5.42930300 | 4.73157400  | 0.58518300  |
| H  | -4.40493600 | 6.77718200  | 1.56123800  |
| H  | -1.95747900 | 6.83761600  | 2.01113000  |
| H  | -0.55632300 | 4.86573000  | 1.49528300  |
| H  | 3.37794400  | 3.20272800  | -1.00018600 |
| H  | 3.00756800  | 3.51710100  | -2.71604000 |
| H  | 4.78249500  | 1.57958400  | -2.17277200 |
| H  | 3.49069700  | 1.19831800  | -3.33970300 |
| C  | 0.71411100  | -1.57939000 | -0.40178500 |
| C  | -0.51668600 | -2.05584400 | -0.04198300 |
| C  | -1.07207500 | -3.38274100 | 0.21398600  |
| C  | -2.45638600 | -3.56845100 | 0.39097700  |
| C  | -2.97707000 | -4.83891900 | 0.62840100  |
| C  | -2.13169700 | -5.94805500 | 0.69446500  |
| C  | -0.75546700 | -5.77367800 | 0.52407300  |
| C  | -0.22861300 | -4.50698500 | 0.29018400  |
| H  | -3.12333900 | -2.71467400 | 0.33829400  |
| H  | -4.04900400 | -4.96148800 | 0.76027300  |
| H  | -2.54001600 | -6.93812300 | 0.87823600  |
| H  | -0.08510200 | -6.62711000 | 0.57661800  |
| H  | 0.84388600  | -4.38406800 | 0.17008900  |
| Cu | 2.31317400  | -2.59279000 | -0.82722000 |
| Br | 4.17959400  | -3.79680800 | -1.33230800 |

B3LYP/6-31G\* (Lan12DZ for Cu)

Thermal correction to Gibbs Free Energy = 0.250203 a.u.

Sum of electronic and thermal Free Energies = -4448.775965 a.u.

M06-2x/6-311++G\*\* (Lan12DZ for Cu)

Energy = -4451.7173251 a.u.

No imaginary frequency

**in3**

|    |             |             |             |
|----|-------------|-------------|-------------|
| O  | -0.81967900 | 2.23121400  | 0.15040700  |
| C  | -1.55614000 | 1.12023800  | 0.10163900  |
| C  | -2.97057400 | 1.35693300  | 0.12780600  |
| C  | -3.92083300 | 0.60794900  | -0.48795200 |
| C  | -5.35851800 | 0.85217100  | -0.48681400 |
| C  | -5.98137400 | 1.79853400  | 0.35334800  |
| C  | -7.35680100 | 1.99570500  | 0.30237400  |
| C  | -8.14580700 | 1.25219100  | -0.58276900 |
| C  | -7.54690800 | 0.30476400  | -1.41540600 |
| C  | -6.16950500 | 0.10574600  | -1.36498500 |
| C  | -0.66254200 | 0.00701200  | 0.03845800  |
| C  | -0.94483900 | -1.36185900 | 0.23540600  |
| S  | -2.53662000 | -2.05135800 | 0.46909700  |
| C  | -1.93895400 | -3.66528600 | 1.12479000  |
| C  | -0.65941700 | -4.00108000 | 0.38609300  |
| S  | 0.38242000  | -2.48218000 | 0.34040300  |
| H  | -3.24826800 | 2.29134500  | 0.61046200  |
| H  | -3.60245800 | -0.23446000 | -1.09636900 |
| H  | -5.38700300 | 2.37099900  | 1.05908000  |
| H  | -7.81953300 | 2.72760600  | 0.95854400  |
| H  | -9.22023900 | 1.40880400  | -0.61757600 |
| H  | -8.15244800 | -0.27861900 | -2.10329500 |
| H  | -5.70524000 | -0.63035600 | -2.01693900 |
| H  | -2.73055500 | -4.39909900 | 0.94671000  |
| H  | -1.77702100 | -3.56302500 | 2.20214500  |
| H  | -0.85197400 | -4.31917900 | -0.64336200 |
| H  | -0.04710500 | -4.75427700 | 0.88416500  |
| C  | 0.70267600  | 0.52732400  | -0.03688400 |
| C  | 0.54297100  | 1.88289600  | 0.05585200  |
| C  | 1.44895700  | 3.03026200  | 0.06941000  |
| C  | 0.95162400  | 4.34630100  | 0.01263600  |
| C  | 1.82111700  | 5.43519100  | 0.01755500  |
| C  | 3.20167000  | 5.23688500  | 0.07906900  |
| C  | 3.70562900  | 3.93471000  | 0.13957000  |
| C  | 2.84219300  | 2.84314100  | 0.13838000  |
| H  | -0.11882600 | 4.51242100  | -0.04064500 |
| H  | 1.41630700  | 6.44289100  | -0.02935500 |
| H  | 3.87825500  | 6.08720400  | 0.08166200  |
| H  | 4.77761000  | 3.76502000  | 0.19190900  |
| H  | 3.24689600  | 1.83691900  | 0.19799600  |
| Cu | 2.35910500  | -0.45587600 | -0.26472000 |
| Br | 4.32464700  | -1.60219700 | -0.55711700 |
| N  | 2.56671300  | -4.60396900 | 0.48338000  |
| H  | 3.08669700  | -3.77896900 | 0.16371600  |

|   |            |             |             |
|---|------------|-------------|-------------|
| H | 2.81427200 | -5.35036700 | -0.16671200 |
| H | 2.99359300 | -4.86036900 | 1.37383800  |

B3LYP/6-31G\* (Lan12DZ for Cu)

Thermal correction to Gibbs Free Energy = 0.283888 a.u.

Sum of electronic and thermal Free Energies = -4505.308930 a.u.

M06-2x/6-311++G\*\* (Lan12DZ for Cu)

Energy = -4508.2788312 a.u.

No imaginary frequency

**ts2**

|   |             |             |             |
|---|-------------|-------------|-------------|
| O | -0.47034600 | 2.15285200  | 0.11910700  |
| C | -1.12815800 | 0.96983000  | 0.14889100  |
| C | -2.55658700 | 1.11309600  | 0.33747700  |
| C | -3.52895500 | 0.39373100  | -0.26663700 |
| C | -4.97140500 | 0.54470400  | -0.07154200 |
| C | -5.53578200 | 1.30944900  | 0.96926900  |
| C | -6.91585800 | 1.43173900  | 1.09661700  |
| C | -7.77026600 | 0.78826500  | 0.19502300  |
| C | -7.22886800 | 0.01691000  | -0.83495300 |
| C | -5.84675100 | -0.10495900 | -0.96304500 |
| C | -0.18725700 | -0.04668900 | -0.04529100 |
| C | -0.35037000 | -1.49754900 | -0.00298400 |
| S | -1.87427300 | -2.28386000 | 0.48978000  |
| C | -1.28362000 | -3.97248500 | 0.07642300  |
| C | -0.56106400 | -3.89706000 | -1.26216600 |
| S | 0.50560700  | -2.38910100 | -1.28935600 |
| H | -2.82753700 | 1.95508400  | 0.97233200  |
| H | -3.24016800 | -0.35650100 | -0.99785400 |
| H | -4.88973900 | 1.79952100  | 1.69182200  |
| H | -7.32949400 | 2.02574400  | 1.90721200  |
| H | -8.84740000 | 0.88374300  | 0.29993300  |
| H | -7.88295400 | -0.49020300 | -1.53916300 |
| H | -5.43013500 | -0.70320900 | -1.77015700 |
| H | -2.16467700 | -4.61919500 | 0.02795700  |
| H | -0.62357900 | -4.34326900 | 0.86733400  |
| H | -1.27150500 | -3.83170200 | -2.09110100 |
| H | 0.08468300  | -4.76707800 | -1.41317100 |
| C | 1.12425000  | 0.55636400  | -0.22431300 |
| C | 0.87804100  | 1.90336800  | -0.11289900 |
| C | 1.72175500  | 3.09522400  | -0.17291400 |
| C | 1.18400000  | 4.37740300  | 0.04850000  |
| C | 1.99603200  | 5.50852700  | -0.00833400 |
| C | 3.35907000  | 5.38825200  | -0.28595300 |
| C | 3.90312300  | 4.12024600  | -0.50973800 |
| C | 3.09609300  | 2.98766800  | -0.45734700 |

|    |            |             |             |
|----|------------|-------------|-------------|
| H  | 0.12620600 | 4.48182600  | 0.26464900  |
| H  | 1.55980700 | 6.48889900  | 0.16578400  |
| H  | 3.99064600 | 6.27146800  | -0.32881900 |
| H  | 4.96205200 | 4.01150000  | -0.72893800 |
| H  | 3.52798600 | 2.00771700  | -0.63915700 |
| Cu | 2.77838000 | -0.44623900 | -0.19072000 |
| Br | 4.29393600 | -2.03490700 | 0.50258400  |
| N  | 0.80689800 | -1.89227500 | 1.63275200  |
| H  | 1.78530100 | -2.07708000 | 1.35726200  |
| H  | 0.44660700 | -2.66407300 | 2.19476900  |
| H  | 0.79171500 | -1.03622700 | 2.18633800  |

B3LYP/6-31G\* (Lan12DZ for Cu)

Thermal correction to Gibbs Free Energy = 0.287689 a.u.

Sum of electronic and thermal Free Energies = -4505.276185 a.u.

M06-2x/6-311++G\*\* (Lan12DZ for Cu)

Energy = -4508.261494 a.u.

Number of Imaginary Frequencies = 1

Lowest Frequency = 285.75i

#### in4

|   |            |             |             |
|---|------------|-------------|-------------|
| O | 0.51588800 | 2.12627300  | -0.24248600 |
| C | 1.13528500 | 0.91469700  | -0.29066500 |
| C | 2.57009900 | 1.00736800  | -0.16210300 |
| C | 3.40063100 | 0.07820400  | 0.36172300  |
| C | 4.85497000 | 0.18489000  | 0.47943800  |
| C | 5.61734800 | 1.13536600  | -0.22938700 |
| C | 6.99828600 | 1.20532900  | -0.07140700 |
| C | 7.65926100 | 0.32347100  | 0.78979600  |
| C | 6.92211800 | -0.63331000 | 1.49038800  |
| C | 5.53931300 | -0.70242600 | 1.33320000  |
| C | 0.14680500 | -0.06181100 | -0.42584800 |
| C | 0.36416700 | -1.53334900 | -0.66374200 |
| S | 1.62669800 | -1.86510500 | -1.96446900 |
| C | 2.00124500 | -3.57247700 | -1.40882700 |
| C | 2.14329900 | -3.54655000 | 0.11073000  |
| S | 0.75589100 | -2.57711300 | 0.84087900  |
| H | 2.96965100 | 1.97226100  | -0.46884100 |
| H | 2.96298100 | -0.82269200 | 0.78295500  |
| H | 5.12508200 | 1.81103800  | -0.92277000 |
| H | 7.56504800 | 1.94572300  | -0.62987800 |
| H | 8.73793700 | 0.37867700  | 0.90722900  |
| H | 7.42421100 | -1.32518800 | 2.16156800  |
| H | 4.97004400 | -1.44207400 | 1.89260300  |
| H | 2.94001500 | -3.86480000 | -1.89024800 |
| H | 1.22568200 | -4.27871400 | -1.72711400 |

|    |             |             |             |
|----|-------------|-------------|-------------|
| H  | 3.09189800  | -3.08569900 | 0.39816200  |
| H  | 2.09740100  | -4.55591100 | 0.53156200  |
| C  | -1.15116600 | 0.58141300  | -0.39487800 |
| C  | -0.84533100 | 1.92228900  | -0.29294200 |
| C  | -1.65920800 | 3.13426200  | -0.21765500 |
| C  | -1.08034300 | 4.37210800  | 0.12186600  |
| C  | -1.86013200 | 5.52407600  | 0.20140600  |
| C  | -3.23202300 | 5.47012400  | -0.05389700 |
| C  | -3.81692700 | 4.24824900  | -0.39795300 |
| C  | -3.04065700 | 3.09613000  | -0.48475300 |
| H  | -0.01694200 | 4.42208600  | 0.32992100  |
| H  | -1.39285500 | 6.46844600  | 0.46870500  |
| H  | -3.83851000 | 6.36934300  | 0.01144000  |
| H  | -4.88190100 | 4.19268200  | -0.60782500 |
| H  | -3.50162300 | 2.15615000  | -0.77650100 |
| Cu | -2.88096800 | -0.26449300 | -0.17931700 |
| Br | -4.24589000 | -2.12312100 | -0.09974800 |
| N  | -0.95101000 | -2.12326500 | -1.21401800 |
| H  | -1.74796500 | -2.12834700 | -0.53036800 |
| H  | -0.80396300 | -3.08548100 | -1.53121900 |
| H  | -1.28254300 | -1.54782600 | -1.99891200 |

B3LYP/6-31G\* (Lan12DZ for Cu)

Thermal correction to Gibbs Free Energy = 0.291373 a.u.

Sum of electronic and thermal Free Energies = -4505.286196 a.u.

M06-2x/6-311++G\*\* (Lan12DZ for Cu)

Energy = -4508.2821126 a.u.

No imaginary frequency

### ts3

|   |             |             |             |
|---|-------------|-------------|-------------|
| O | -0.08081700 | 2.06444500  | 0.20698500  |
| C | -0.96414000 | 1.01341500  | 0.24571000  |
| C | -2.33885100 | 1.39193400  | 0.04082900  |
| C | -3.33732100 | 0.57203100  | -0.35830500 |
| C | -4.73791400 | 0.94157900  | -0.55967300 |
| C | -5.28670600 | 2.16480100  | -0.12420200 |
| C | -6.62430000 | 2.46984900  | -0.35605900 |
| C | -7.45371800 | 1.56114800  | -1.02172900 |
| C | -6.93028700 | 0.34019100  | -1.45104000 |
| C | -5.59068500 | 0.03534000  | -1.21928600 |
| C | -0.22879600 | -0.13545100 | 0.47093800  |
| C | -0.60670300 | -1.55419800 | 0.83254600  |
| S | -1.94811800 | -1.65222700 | 2.09062700  |
| C | -2.38579900 | -3.38431600 | 1.67883900  |
| C | -2.51449100 | -3.48303300 | 0.16019000  |
| S | -1.10177200 | -2.60157300 | -0.63536900 |

|    |             |             |             |
|----|-------------|-------------|-------------|
| H  | -2.52809000 | 2.45269000  | 0.18905600  |
| H  | -3.09079300 | -0.46096200 | -0.59063300 |
| H  | -4.66500100 | 2.87486900  | 0.41322100  |
| H  | -7.02594000 | 3.41851300  | -0.00988000 |
| H  | -8.49833400 | 1.80209500  | -1.19799200 |
| H  | -7.56519500 | -0.37468600 | -1.96765800 |
| H  | -5.18625000 | -0.91383800 | -1.56431200 |
| H  | -3.33621000 | -3.60683200 | 2.17401600  |
| H  | -1.62684800 | -4.07468700 | 2.06110500  |
| H  | -3.44810200 | -3.02444800 | -0.17688000 |
| H  | -2.49172400 | -4.52583800 | -0.17151400 |
| C  | 1.17019400  | 0.20869400  | 0.52280700  |
| C  | 1.19161400  | 1.58570100  | 0.38507700  |
| C  | 2.25486700  | 2.58745100  | 0.38179600  |
| C  | 1.99350600  | 3.91259200  | -0.01228700 |
| C  | 3.01212700  | 4.86297000  | -0.01346100 |
| C  | 4.30677300  | 4.51244200  | 0.37590700  |
| C  | 4.57496100  | 3.20021000  | 0.77526700  |
| C  | 3.55992800  | 2.24803700  | 0.78452600  |
| H  | 0.99175800  | 4.18824300  | -0.32354900 |
| H  | 2.79405300  | 5.88066800  | -0.32597400 |
| H  | 5.10044000  | 5.25432000  | 0.36806300  |
| H  | 5.57723300  | 2.91614200  | 1.08334600  |
| H  | 3.77712500  | 1.23476200  | 1.11140700  |
| Cu | 2.76381200  | -0.73275700 | -0.28242900 |
| Br | 4.40948000  | -1.98466400 | -1.18563100 |
| N  | 0.67978600  | -2.10967900 | 1.41936400  |
| H  | 1.01396100  | -2.93957700 | 0.92673400  |
| H  | 0.58880400  | -2.30067100 | 2.41792500  |
| H  | 1.43750800  | -1.08287200 | 1.16513700  |

B3LYP/6-31G\* (Lan12DZ for Cu)

Thermal correction to Gibbs Free Energy = 0.285305 a.u.

Sum of electronic and thermal Free Energies = -4505.278099 a.u.

M06-2x/6-311++G\*\* (Lan12DZ for Cu)

Energy = -4508.2681678 a.u.

Number of Imaginary Frequencies = 1

Lowest Frequency = 1272.53i

**in5**

|   |             |            |             |
|---|-------------|------------|-------------|
| O | 0.00795700  | 1.94874600 | 0.21738600  |
| C | -0.86191200 | 0.88398200 | 0.36835800  |
| C | -2.22836900 | 1.25049500 | 0.08002000  |
| C | -3.20108900 | 0.42248600 | -0.35782600 |
| C | -4.58465900 | 0.79427300 | -0.65338700 |
| C | -5.16186200 | 2.01237700 | -0.24292400 |



|    |             |             |             |
|----|-------------|-------------|-------------|
| C  | -6.48138800 | 2.31834500  | -0.56094200 |
| C  | -7.26091700 | 1.41525500  | -1.29134700 |
| C  | -6.70824000 | 0.19939400  | -1.69785900 |
| C  | -5.38723300 | -0.10743900 | -1.37822100 |
| C  | -0.13229200 | -0.23999900 | 0.72558000  |
| C  | -0.54784200 | -1.64413300 | 1.11220000  |
| S  | -1.99218200 | -1.56906000 | 2.32020100  |
| C  | -2.55580600 | -3.26004800 | 1.91557200  |
| C  | -2.65763400 | -3.35437200 | 0.39488200  |
| S  | -1.12499700 | -2.66359900 | -0.36240700 |
| H  | -2.42120200 | 2.31588500  | 0.18383100  |
| H  | -2.94012100 | -0.61297900 | -0.55267200 |
| H  | -4.57913000 | 2.71553800  | 0.34493200  |
| H  | -6.90832500 | 3.26199400  | -0.23202600 |
| H  | -8.29173400 | 1.65671900  | -1.53527500 |
| H  | -7.30556500 | -0.50999100 | -2.26415900 |
| H  | -4.95777900 | -1.05175000 | -1.70509700 |
| H  | -3.52958600 | -3.41119200 | 2.39182100  |
| H  | -1.85694400 | -4.00339000 | 2.31404600  |
| H  | -3.52804400 | -2.79513500 | 0.03931600  |
| H  | -2.74782600 | -4.39430700 | 0.06359800  |
| C  | 1.25658100  | 0.17139100  | 0.73535400  |
| C  | 1.28437400  | 1.53262400  | 0.43481300  |
| C  | 2.33784500  | 2.54768400  | 0.45524300  |
| C  | 2.03271700  | 3.89511200  | 0.19896500  |
| C  | 3.03860900  | 4.85857600  | 0.22777000  |
| C  | 4.35672800  | 4.49492400  | 0.51043600  |
| C  | 4.66666500  | 3.15571100  | 0.76582800  |
| C  | 3.66801600  | 2.18782800  | 0.73887500  |
| H  | 1.00995000  | 4.17893900  | -0.02353400 |
| H  | 2.79094500  | 5.89670800  | 0.02526400  |
| H  | 5.13919100  | 5.24810600  | 0.52823800  |
| H  | 5.69024800  | 2.86365100  | 0.98183600  |
| H  | 3.92229600  | 1.14868300  | 0.92746400  |
| Cu | 1.82032400  | -0.00052300 | -1.30197600 |
| Br | 2.51120100  | -0.54451100 | -3.37283600 |
| N  | 0.61518000  | -2.33299000 | 1.64964500  |
| H  | 0.44800300  | -3.33357100 | 1.69536000  |
| H  | 0.81640700  | -1.99815800 | 2.59192500  |
| H  | 2.06665400  | -0.41949800 | 1.14030600  |

B3LYP/6-31G\* (Lanl2DZ for Cu)

Thermal correction to Gibbs Free Energy = 0.288598 a.u.

Sum of electronic and thermal Free Energies = -4505.325262 a.u.

M06-2x/6-311++G\*\* (Lanl2DZ for Cu)

Energy = -4508.3190328 a.u.

No imaginary frequency

**in6**

|    |             |             |             |
|----|-------------|-------------|-------------|
| O  | -0.06332700 | 1.94985400  | 0.28701900  |
| C  | -0.91121000 | 0.87396700  | 0.37127400  |
| C  | -2.27888800 | 1.23342700  | 0.08300000  |
| C  | -3.26776200 | 0.42659000  | -0.35958700 |
| C  | -4.64459600 | 0.82826700  | -0.64974200 |
| C  | -5.19873400 | 2.05355100  | -0.22804900 |
| C  | -6.51137400 | 2.38970900  | -0.54476600 |
| C  | -7.30974900 | 1.51048500  | -1.28376900 |
| C  | -6.78126000 | 0.28736300  | -1.70051200 |
| C  | -5.46675900 | -0.04891600 | -1.38347500 |
| C  | -0.16014000 | -0.24917700 | 0.71516500  |
| C  | -0.61068200 | -1.65120200 | 1.04692500  |
| S  | -1.94043500 | -1.60628600 | 2.34548200  |
| C  | -2.63606900 | -3.24222700 | 1.90692200  |
| C  | -2.80150400 | -3.27645200 | 0.38960700  |
| S  | -1.26436700 | -2.64534400 | -0.40711800 |
| H  | -2.46414400 | 2.29982700  | 0.19308600  |
| H  | -3.02877100 | -0.61005500 | -0.57206800 |
| H  | -4.60280200 | 2.73944600  | 0.36692600  |
| H  | -6.91842100 | 3.33918400  | -0.20726400 |
| H  | -8.33513000 | 1.77550500  | -1.52603100 |
| H  | -7.39228700 | -0.40480800 | -2.27367700 |
| H  | -5.05716000 | -0.99859500 | -1.72100300 |
| H  | -3.60167000 | -3.33153400 | 2.41482300  |
| H  | -1.99070300 | -4.05492000 | 2.25833000  |
| H  | -3.65142300 | -2.65806900 | 0.08809000  |
| H  | -2.96027500 | -4.29753400 | 0.02814200  |
| C  | 1.19779400  | 0.19935500  | 0.80937600  |
| C  | 1.21251300  | 1.54177000  | 0.53685200  |
| C  | 2.27254500  | 2.53894100  | 0.47597700  |
| C  | 1.96744700  | 3.90919500  | 0.39175400  |
| C  | 2.98826200  | 4.85566800  | 0.34077500  |
| C  | 4.32567700  | 4.45445500  | 0.37315400  |
| C  | 4.63692100  | 3.09403800  | 0.45183600  |
| C  | 3.62239600  | 2.14232700  | 0.50017900  |
| H  | 0.92947000  | 4.22420600  | 0.36841900  |
| H  | 2.73744800  | 5.91099700  | 0.27605400  |
| H  | 5.11978400  | 5.19470500  | 0.33203900  |
| H  | 5.67412200  | 2.77116600  | 0.46611300  |
| H  | 3.87783100  | 1.08713400  | 0.53647100  |
| Cu | 2.05541800  | -2.86224800 | 0.27737800  |
| Br | 3.84012600  | -3.34891200 | -0.98547500 |

|   |            |             |            |
|---|------------|-------------|------------|
| N | 0.57007600 | -2.42985500 | 1.54650200 |
| H | 0.23078900 | -3.33904000 | 1.86231400 |
| H | 0.93478600 | -1.96119000 | 2.38052900 |
| H | 2.06676700 | -0.39580500 | 1.04699600 |

B3LYP/6-31G\* (Lan12DZ for Cu)

Thermal correction to Gibbs Free Energy = 0.291225 a.u.

Sum of electronic and thermal Free Energies = -4505.341878 a.u.

M06-2x/6-311++G\*\* (Lan12DZ for Cu)

Energy = -4508.3372395 a.u.

No imaginary frequency

**ts4**

|   |             |             |             |
|---|-------------|-------------|-------------|
| O | -0.15551300 | 2.40127000  | 0.36191400  |
| C | 0.70740300  | 1.37077100  | 0.51837500  |
| C | 2.07804600  | 1.71893900  | 0.30359100  |
| C | 3.03271400  | 0.85412100  | -0.12980800 |
| C | 4.41446800  | 1.18401500  | -0.44494500 |
| C | 5.03803200  | 2.38272100  | -0.03945400 |
| C | 6.36468200  | 2.63629400  | -0.36892500 |
| C | 7.09818900  | 1.70272400  | -1.11059100 |
| C | 6.49613500  | 0.50970900  | -1.51767400 |
| C | 5.16878000  | 0.25011000  | -1.18615300 |
| C | -0.04749900 | 0.17521400  | 0.68043300  |
| C | 0.38502100  | -1.12917700 | 1.03280200  |
| S | 2.09662300  | -2.64379000 | -1.07803700 |
| C | 3.08732400  | -3.02676300 | 0.41958300  |
| C | 2.36252600  | -2.99368100 | 1.76644500  |
| S | 1.66107000  | -1.33384400 | 2.19541100  |
| H | 2.28209200  | 2.78353400  | 0.38847300  |
| H | 2.74304800  | -0.17630400 | -0.33047200 |
| H | 4.48703900  | 3.10628900  | 0.55445000  |
| H | 6.83360500  | 3.56096400  | -0.04403000 |
| H | 8.13435100  | 1.90589600  | -1.36656600 |
| H | 7.06020500  | -0.21686100 | -2.09561700 |
| H | 4.68980300  | -0.66926900 | -1.51555200 |
| H | 3.93629600  | -2.33063500 | 0.45354000  |
| H | 3.51116800  | -4.03528300 | 0.32726300  |
| H | 3.05745400  | -3.18485300 | 2.59292900  |
| H | 1.57632200  | -3.75273500 | 1.82631800  |
| C | -1.42823200 | 0.57231200  | 0.53263600  |
| C | -1.45480600 | 1.92066900  | 0.36422400  |
| C | -2.53540600 | 2.88200700  | 0.20700000  |
| C | -2.30269100 | 4.26277100  | 0.32828400  |
| C | -3.35415100 | 5.16479300  | 0.18081800  |
| C | -4.64485700 | 4.70371700  | -0.08779400 |

|    |             |             |             |
|----|-------------|-------------|-------------|
| C  | -4.88019300 | 3.33141900  | -0.21550700 |
| C  | -3.83630900 | 2.42210400  | -0.07390500 |
| H  | -1.30071400 | 4.62199100  | 0.53932900  |
| H  | -3.16461500 | 6.23028300  | 0.27704300  |
| H  | -5.46264000 | 5.40961300  | -0.20297600 |
| H  | -5.87914100 | 2.96651900  | -0.43602400 |
| H  | -4.02536000 | 1.35932000  | -0.20271700 |
| N  | -0.32393500 | -2.26317600 | 0.57841800  |
| H  | -0.29055600 | -3.00218700 | 1.28308500  |
| H  | 0.37605900  | -2.62892000 | -0.23385500 |
| H  | -2.29614000 | -0.06231800 | 0.63828600  |
| Cu | -2.15937400 | -2.23027000 | -0.18384500 |
| Br | -4.30722600 | -2.06576400 | -0.82572100 |

B3LYP/6-31G\* (Lanl2DZ for Cu)

Thermal correction to Gibbs Free Energy = 0.286425 a.u.

Sum of electronic and thermal Free Energies = -4505.294535 a.u.

M06-2x/6-311++G\*\* (Lanl2DZ for Cu)

Energy = -4508.2711857 a.u.

Number of Imaginary Frequencies = 1

Lowest Frequency = 528.80i

**in7**

|   |             |             |             |
|---|-------------|-------------|-------------|
| O | 0.75113100  | 1.71804600  | 0.20080200  |
| C | -0.31774100 | 0.87554800  | 0.18814500  |
| C | -1.52877700 | 1.42316000  | -0.36037800 |
| C | -2.77499300 | 1.06635800  | 0.03027500  |
| C | -4.03835400 | 1.56413200  | -0.50996100 |
| C | -4.12545000 | 2.30305300  | -1.70725000 |
| C | -5.35335200 | 2.76637000  | -2.16813300 |
| C | -6.52466900 | 2.49743200  | -1.45150400 |
| C | -6.45757400 | 1.75630700  | -0.27011400 |
| C | -5.22844100 | 1.29195300  | 0.19393800  |
| C | 0.04363100  | -0.31187000 | 0.82676900  |
| C | -0.70324700 | -1.55285600 | 0.96428700  |
| S | -4.06882200 | -2.32751200 | 2.65429800  |
| C | -3.65458100 | -3.34706200 | 1.17706700  |
| C | -3.28751400 | -2.57712100 | -0.09841800 |
| S | -1.52601700 | -2.16837100 | -0.51427300 |
| H | -1.38173600 | 2.21795200  | -1.08789300 |
| H | -2.87289700 | 0.36721500  | 0.85880300  |
| H | -3.22859500 | 2.50099700  | -2.28694700 |
| H | -5.40110000 | 3.33322600  | -3.09392100 |
| H | -7.48198300 | 2.85861600  | -1.81677500 |
| H | -7.36238200 | 1.53994300  | 0.29108900  |
| H | -5.17893800 | 0.71669600  | 1.11556200  |

|    |             |             |             |
|----|-------------|-------------|-------------|
| H  | -4.59207300 | -3.87762200 | 0.97895800  |
| H  | -2.91924000 | -4.11732700 | 1.42800100  |
| H  | -3.86532600 | -1.65171800 | -0.15542800 |
| H  | -3.55333900 | -3.18694100 | -0.97021600 |
| C  | 1.39502200  | -0.12857300 | 1.27735700  |
| C  | 1.79368800  | 1.11169100  | 0.86391700  |
| C  | 3.04324200  | 1.85241100  | 0.97198700  |
| C  | 3.26174900  | 3.01536900  | 0.21286400  |
| C  | 4.46565000  | 3.70819800  | 0.31991100  |
| C  | 5.46677100  | 3.25419900  | 1.18135600  |
| C  | 5.25405800  | 2.10168600  | 1.94319800  |
| C  | 4.05261800  | 1.40617300  | 1.84448900  |
| H  | 2.48672800  | 3.36847100  | -0.45925600 |
| H  | 4.62228500  | 4.60510000  | -0.27308400 |
| H  | 6.40421400  | 3.79703300  | 1.26356100  |
| H  | 6.02262100  | 1.74822600  | 2.62467000  |
| H  | 3.88697200  | 0.52667100  | 2.45986100  |
| Cu | 0.20397200  | -1.84821100 | 3.74840400  |
| Br | 1.10050000  | -1.39392100 | 5.74698800  |
| N  | -0.59237100 | -2.27215100 | 2.04202600  |
| H  | -0.99226700 | -3.20260300 | 1.93516900  |
| H  | -2.81402800 | -1.97851400 | 3.01063600  |
| H  | 2.00022400  | -0.86655000 | 1.78265000  |

B3LYP/6-31G\* (Lan12DZ for Cu)

Thermal correction to Gibbs Free Energy = 0.283499 a.u.

Sum of electronic and thermal Free Energies = -4505.343677 a.u.

M06-2x/6-311++G\*\* (Lan12DZ for Cu)

Energy = -4508.3159753 a.u.

No imaginary frequency

#### ts5

|   |             |             |             |
|---|-------------|-------------|-------------|
| O | 2.80725600  | -1.28240900 | 0.42595200  |
| C | 1.51526100  | -0.88466000 | 0.35869400  |
| C | 0.57968300  | -1.66381400 | 1.10233600  |
| C | -0.77116500 | -1.64263100 | 0.93776700  |
| C | -1.74872500 | -2.42870700 | 1.67261400  |
| C | -1.43991200 | -3.11981800 | 2.86409000  |
| C | -2.41237900 | -3.86411600 | 3.51997500  |
| C | -3.71202300 | -3.93586700 | 3.00289300  |
| C | -4.03354400 | -3.25422600 | 1.82738000  |
| C | -3.06471600 | -2.50174600 | 1.16792600  |
| C | 1.45655700  | 0.24433600  | -0.48987900 |
| C | 0.35067200  | 1.03716800  | -0.74085800 |
| S | -2.01427900 | 5.24884800  | 2.03798300  |
| C | -0.33570500 | 4.70109300  | 2.55667100  |

|    |             |             |             |
|----|-------------|-------------|-------------|
| C  | 0.14969300  | 3.40257900  | 1.90665600  |
| S  | 0.49925200  | 3.57286300  | 0.10769500  |
| H  | 1.03925000  | -2.35646700 | 1.80211400  |
| H  | -1.19089900 | -1.01376600 | 0.15664000  |
| H  | -0.44149300 | -3.05529300 | 3.28703800  |
| H  | -2.16365200 | -4.38559700 | 4.43999800  |
| H  | -4.46961400 | -4.51831900 | 3.51988200  |
| H  | -5.03940400 | -3.30634700 | 1.42134300  |
| H  | -3.31765500 | -1.98584200 | 0.24395700  |
| H  | -0.42086800 | 4.55640800  | 3.64001000  |
| H  | 0.37989500  | 5.50909600  | 2.38074200  |
| H  | -0.57986300 | 2.60382200  | 2.07844600  |
| H  | 1.09354600  | 3.10910300  | 2.38379200  |
| C  | 2.80314600  | 0.48889300  | -0.94278300 |
| C  | 3.59179100  | -0.45771400 | -0.36471900 |
| C  | 5.01835600  | -0.74962100 | -0.41074900 |
| C  | 5.55359800  | -1.84181200 | 0.29400900  |
| C  | 6.91981300  | -2.11025100 | 0.24061100  |
| C  | 7.76984300  | -1.29840000 | -0.51267000 |
| C  | 7.24432500  | -0.21046100 | -1.21607900 |
| C  | 5.88133000  | 0.06398500  | -1.16740000 |
| H  | 4.89694200  | -2.47645100 | 0.87910400  |
| H  | 7.32038600  | -2.95793000 | 0.78932400  |
| H  | 8.83436400  | -1.51059600 | -0.55266500 |
| H  | 7.89871300  | 0.42657400  | -1.80416100 |
| H  | 5.48511100  | 0.91305800  | -1.71664300 |
| N  | -0.76487200 | 1.39793500  | -1.08708400 |
| H  | -0.79203400 | 2.49352500  | -0.67857700 |
| H  | -1.71050900 | 5.42484300  | 0.73321700  |
| H  | 3.10625500  | 1.29868200  | -1.58837000 |
| Cu | -2.21343200 | 0.42338900  | -1.91693600 |
| Br | -3.89993900 | -0.90187700 | -2.55976700 |

B3LYP/6-31G\* (Lanl2DZ for Cu)

Thermal correction to Gibbs Free Energy = 0.272062 a.u.

Sum of electronic and thermal Free Energies = -4505.277903 a.u.

M06-2x/6-311++G\*\* (Lanl2DZ for Cu)

Energy = -4508.2224371 a.u.

Number of Imaginary Frequencies = 1

Lowest Frequency = 1330.60i

**in8**

|   |             |             |            |
|---|-------------|-------------|------------|
| O | 2.78943600  | -1.59598600 | 0.24975700 |
| C | 1.46086700  | -1.36663600 | 0.08673700 |
| C | 0.58055000  | -2.12741600 | 0.92431800 |
| C | -0.77337200 | -2.05078300 | 0.91614700 |

|    |             |             |             |
|----|-------------|-------------|-------------|
| C  | -1.70124900 | -2.80515900 | 1.75092300  |
| C  | -1.29047400 | -3.74519500 | 2.71892800  |
| C  | -2.22736800 | -4.43156200 | 3.48272200  |
| C  | -3.59570000 | -4.19865200 | 3.30129100  |
| C  | -4.02003700 | -3.27150800 | 2.34788500  |
| C  | -3.08255300 | -2.58289900 | 1.58189900  |
| C  | 1.31594700  | -0.39736800 | -0.90909800 |
| C  | 0.10700100  | 0.13174600  | -1.38935400 |
| H  | 1.09604200  | -2.80413300 | 1.59998200  |
| H  | -1.25076900 | -1.36150900 | 0.22315500  |
| H  | -0.23364900 | -3.94006400 | 2.87580500  |
| H  | -1.89291700 | -5.15201000 | 4.22403100  |
| H  | -4.32367600 | -4.73771000 | 3.90095800  |
| H  | -5.07958500 | -3.08384400 | 2.20003200  |
| H  | -3.41724400 | -1.86145500 | 0.84029500  |
| C  | 2.63473900  | -0.04358900 | -1.34944700 |
| C  | 3.50671100  | -0.79893900 | -0.61603000 |
| C  | 4.95878200  | -0.91110100 | -0.58261600 |
| C  | 5.59342600  | -1.80118300 | 0.30139500  |
| C  | 6.98305900  | -1.89928100 | 0.32275200  |
| C  | 7.76004100  | -1.11547200 | -0.53262600 |
| C  | 7.13617000  | -0.22806700 | -1.41423000 |
| C  | 5.74894000  | -0.12471700 | -1.44103500 |
| H  | 4.99388800  | -2.41207000 | 0.96757400  |
| H  | 7.45994300  | -2.59148000 | 1.01098500  |
| H  | 8.84320500  | -1.19439200 | -0.51351100 |
| H  | 7.73246800  | 0.38573900  | -2.08335200 |
| H  | 5.27652000  | 0.56886600  | -2.13060700 |
| N  | -0.89481500 | 0.57274500  | -1.78793300 |
| H  | 2.87394100  | 0.68063600  | -2.11348500 |
| Cu | -2.56429000 | 1.20812100  | -2.40122500 |
| Br | -4.53335900 | 1.96348000  | -3.11632100 |

B3LYP/6-31G\* (Lan12DZ for Cu)

Thermal correction to Gibbs Free Energy = 0.209778 a.u.

Sum of electronic and thermal Free Energies = -3629.230270 a.u.

M06-2x/6-311++G\*\* (Lan12DZ for Cu)

Energy = -3632.1350898 a.u.

No imaginary frequency

## P

|   |             |             |             |
|---|-------------|-------------|-------------|
| O | 1.17558900  | -0.33004200 | -0.00005600 |
| C | 0.07077400  | 0.46966500  | 0.00003200  |
| C | -1.19428600 | -0.20919700 | 0.00008400  |
| C | -2.40917200 | 0.38918700  | -0.00014700 |
| C | -3.70990200 | -0.27565300 | -0.00007000 |

|   |             |             |             |
|---|-------------|-------------|-------------|
| C | -3.87102900 | -1.67616100 | 0.00014300  |
| C | -5.13866900 | -2.24723000 | 0.00021700  |
| C | -6.27996500 | -1.43811200 | 0.00008100  |
| C | -6.13965100 | -0.04969600 | -0.00013700 |
| C | -4.86998700 | 0.52312100  | -0.00021500 |
| C | 0.49578000  | 1.79454300  | 0.00005500  |
| C | -0.32834100 | 2.94730100  | 0.00013400  |
| H | -1.10789000 | -1.29268400 | 0.00033000  |
| H | -2.45210500 | 1.47606700  | -0.00041400 |
| H | -2.99912400 | -2.32373800 | 0.00024500  |
| H | -5.24013200 | -3.32923100 | 0.00038000  |
| H | -7.26854900 | -1.88882700 | 0.00014000  |
| H | -7.01900300 | 0.58857400  | -0.00024700 |
| H | -4.76498400 | 1.60535700  | -0.00038300 |
| C | 1.92599700  | 1.77287000  | -0.00002600 |
| C | 2.30264600  | 0.45640800  | -0.00008800 |
| C | 3.59180500  | -0.22107200 | -0.00004500 |
| C | 3.66873800  | -1.62505300 | -0.00015700 |
| C | 4.90693300  | -2.26295000 | -0.00012400 |
| C | 6.08689000  | -1.51685900 | 0.00001400  |
| C | 6.01938300  | -0.12096700 | 0.00012400  |
| C | 4.78605100  | 0.52276500  | 0.00010100  |
| H | 2.75471500  | -2.20905700 | -0.00027700 |
| H | 4.94909800  | -3.34875600 | -0.00021000 |
| H | 7.05110800  | -2.01728200 | 0.00003900  |
| H | 6.93171000  | 0.46914200  | 0.00023200  |
| H | 4.74768600  | 1.60832600  | 0.00020400  |
| N | -1.00601500 | 3.89514100  | 0.00008300  |
| H | 2.57088400  | 2.63900100  | -0.00001200 |

B3LYP/6-31G\*

Thermal correction to Gibbs Free Energy = 0.216870 a.u.

Sum of electronic and thermal Free Energies = -861.582536 a.u.

M06-2x/6-311++G\*\*

Energy = -861.6690026 a.u.

No imaginary frequency

NH<sub>3</sub>-assisted reaction

**in5-NH<sub>3</sub>**

|   |            |            |             |
|---|------------|------------|-------------|
| O | 0.37895700 | 2.09846600 | -0.07649600 |
| C | 1.11722200 | 0.95433800 | -0.02041000 |
| C | 2.53178600 | 1.23060500 | -0.03273900 |
| C | 3.57527500 | 0.39971000 | -0.26071000 |
| C | 4.99066500 | 0.76919200 | -0.21568200 |
| C | 5.46220000 | 1.97342700 | 0.34631900  |



|    |             |             |             |
|----|-------------|-------------|-------------|
| C  | 6.82033800  | 2.27624500  | 0.35399400  |
| C  | 7.75025400  | 1.38386300  | -0.18956300 |
| C  | 7.30407000  | 0.18088000  | -0.73995600 |
| C  | 5.94386100  | -0.12117000 | -0.74922900 |
| C  | 0.22501300  | -0.11783600 | 0.08879900  |
| C  | 0.59041900  | -1.56978600 | 0.27223300  |
| S  | 1.41906600  | -2.33729800 | -1.19748600 |
| C  | 2.23453200  | -3.67650000 | -0.24608300 |
| C  | 2.86602100  | -3.05855400 | 1.00200700  |
| S  | 1.68476900  | -1.87460100 | 1.77077700  |
| H  | 2.73462300  | 2.28472700  | 0.14614600  |
| H  | 3.37456300  | -0.62570900 | -0.55031700 |
| H  | 4.76034400  | 2.66917900  | 0.79643000  |
| H  | 7.15838700  | 3.21032400  | 0.79516700  |
| H  | 8.81016300  | 1.62235600  | -0.17731800 |
| H  | 8.01609100  | -0.52259200 | -1.16386300 |
| H  | 5.60312100  | -1.05589200 | -1.18994000 |
| H  | 2.99568300  | -4.11822100 | -0.89745500 |
| H  | 1.51705800  | -4.46204900 | 0.01481300  |
| H  | 3.78392800  | -2.52158200 | 0.75072800  |
| H  | 3.10072300  | -3.82852800 | 1.74394700  |
| C  | -1.12827100 | 0.40062600  | 0.10168000  |
| C  | -0.95235900 | 1.76711400  | -0.01425400 |
| C  | -1.86803900 | 2.90818700  | -0.06253800 |
| C  | -1.39241200 | 4.21478200  | 0.16388500  |
| C  | -2.25898400 | 5.30502300  | 0.13263900  |
| C  | -3.61951100 | 5.12156400  | -0.12431000 |
| C  | -4.10268900 | 3.83199000  | -0.35975700 |
| C  | -3.23790300 | 2.74085100  | -0.33780900 |
| H  | -0.33888100 | 4.36736900  | 0.37214700  |
| H  | -1.86882600 | 6.30319700  | 0.31479100  |
| H  | -4.29450100 | 5.97286800  | -0.14516000 |
| H  | -5.15655600 | 3.67274700  | -0.57216500 |
| H  | -3.62782500 | 1.74928700  | -0.55342500 |
| Cu | -2.89599500 | -0.39375000 | 0.26775900  |
| Br | -4.80675300 | -1.67028300 | 0.34823900  |
| N  | -0.68334400 | -2.35803500 | 0.51902100  |
| H  | -1.34015400 | -1.77341200 | 1.06801400  |
| H  | -0.47009700 | -3.20295800 | 1.05408500  |
| H  | -1.23931900 | -2.63515100 | -0.40254300 |
| H  | -2.11154400 | -2.38067500 | -2.39562100 |
| N  | -2.23917800 | -3.02680900 | -1.61726900 |
| H  | -3.18051100 | -2.85381400 | -1.24036700 |
| H  | -2.20875600 | -3.97235400 | -1.99732400 |

B3LYP/6-31G\* (Lan12DZ for Cu)

Thermal correction to Gibbs Free Energy = 0.325965 a.u.

Sum of electronic and thermal Free Energies = -4561.831030 a.u.

M06-2x/6-311++G\*\* (Lan12DZ for Cu)

Energy = -4564.8571405 a.u.

No imaginary frequency

**ts3-NH<sub>3</sub>**

|   |             |             |             |
|---|-------------|-------------|-------------|
| O | 0.36056600  | 2.09920000  | -0.03854400 |
| C | 1.09445700  | 0.95207200  | 0.02076000  |
| C | 2.51074300  | 1.22407100  | 0.01814600  |
| C | 3.54269000  | 0.39904000  | -0.27226900 |
| C | 4.96238900  | 0.75123900  | -0.22379700 |
| C | 5.45545900  | 1.90142800  | 0.42585200  |
| C | 6.81639400  | 2.19226300  | 0.43133600  |
| C | 7.72744800  | 1.34050400  | -0.20190900 |
| C | 7.25975600  | 0.18997300  | -0.83978200 |
| C | 5.89692600  | -0.10015900 | -0.84661100 |
| C | 0.20158100  | -0.12058500 | 0.11125900  |
| C | 0.56079700  | -1.57601400 | 0.30209100  |
| S | 1.36547800  | -2.34170900 | -1.19521000 |
| C | 2.23154600  | -3.66339500 | -0.26430000 |
| C | 2.89923600  | -3.02221000 | 0.95272500  |
| S | 1.72267700  | -1.86366300 | 1.76156400  |
| H | 2.72351100  | 2.26589200  | 0.25090500  |
| H | 3.32565900  | -0.60433100 | -0.62214700 |
| H | 4.76811800  | 2.56188900  | 0.94620200  |
| H | 7.17156300  | 3.08413900  | 0.94114800  |
| H | 8.78959500  | 1.56902100  | -0.19102400 |
| H | 7.95706600  | -0.48181000 | -1.33381700 |
| H | 5.53887500  | -0.99302200 | -1.35514200 |
| H | 2.97400400  | -4.10260300 | -0.93867700 |
| H | 1.53316500  | -4.45327800 | 0.03261400  |
| H | 3.79487300  | -2.46940000 | 0.65853800  |
| H | 3.18069000  | -3.78203000 | 1.68904700  |
| C | -1.15157000 | 0.40212000  | 0.09525000  |
| C | -0.97213900 | 1.76913200  | -0.00732100 |
| C | -1.88340600 | 2.91350200  | -0.06983500 |
| C | -1.40516600 | 4.21899800  | 0.15832700  |
| C | -2.26590700 | 5.31337900  | 0.11179600  |
| C | -3.62373600 | 5.13604900  | -0.16274000 |
| C | -4.10970300 | 3.84774000  | -0.39969000 |
| C | -3.25065400 | 2.75258000  | -0.36174800 |
| H | -0.35367900 | 4.36749300  | 0.37920600  |
| H | -1.87297900 | 6.31024500  | 0.29537200  |

|    |             |             |             |
|----|-------------|-------------|-------------|
| H  | -4.29419000 | 5.99056300  | -0.19593600 |
| H  | -5.16145500 | 3.69274400  | -0.62567900 |
| H  | -3.64300300 | 1.76191200  | -0.57755100 |
| Cu | -2.92023200 | -0.39622000 | 0.17967200  |
| Br | -4.82988000 | -1.69648400 | 0.07990400  |
| N  | -0.68843000 | -2.35931400 | 0.57603700  |
| H  | -1.32377500 | -1.78013800 | 1.14345700  |
| H  | -0.45182800 | -3.19036400 | 1.12096200  |
| H  | -1.36388300 | -2.69208900 | -0.47549500 |
| H  | -1.92862700 | -2.36350600 | -2.27368600 |
| N  | -2.13470100 | -2.99592600 | -1.49945100 |
| H  | -3.11103900 | -2.81950800 | -1.19843500 |
| H  | -2.03608100 | -3.95582800 | -1.83163800 |

B3LYP/6-31G\* (Lan12DZ for Cu)

Thermal correction to Gibbs Free Energy = 0.324043 a.u.

Sum of electronic and thermal Free Energies = -4561.831407 a.u.

M06-2x/6-311++G\*\* (Lan12DZ for Cu)

Energy = -4564.8580988 a.u.

Number of Imaginary Frequencies = 1

Lowest Frequency = 827.63i

### in6-NH<sub>3</sub>

|   |            |             |             |
|---|------------|-------------|-------------|
| O | 0.61922200 | 2.10797700  | 0.02847300  |
| C | 1.24775100 | 0.89814200  | -0.04126800 |
| C | 2.63816200 | 1.00370900  | 0.32916900  |
| C | 3.66271500 | 0.16177400  | 0.06413100  |
| C | 5.05030700 | 0.33923700  | 0.49496900  |
| C | 5.44232500 | 1.25079700  | 1.49677400  |
| C | 6.77954300 | 1.38713700  | 1.85744700  |
| C | 7.76525100 | 0.61186900  | 1.23793900  |
| C | 7.39522900 | -0.30596000 | 0.25304100  |
| C | 6.05650600 | -0.44083200 | -0.10926300 |
| C | 0.30029400 | -0.05694400 | -0.42207400 |
| C | 0.50359100 | -1.55349300 | -0.52691000 |
| S | 1.59398300 | -2.02002100 | -1.97922800 |
| C | 2.12894800 | -3.62256900 | -1.26907300 |
| C | 2.56455600 | -3.36945500 | 0.17553300  |
| S | 1.33756200 | -2.28464200 | 1.01111500  |
| H | 2.84763700 | 1.93341000  | 0.85527000  |
| H | 3.47776100 | -0.70428600 | -0.56204400 |
| H | 4.69019900 | 1.84340100  | 2.00925400  |
| H | 7.05514900 | 2.09575800  | 2.63430700  |
| H | 8.80749600 | 0.71811900  | 1.52605100  |
| H | 8.15041300 | -0.91705900 | -0.23481400 |
| H | 5.77747000 | -1.15086600 | -0.88511000 |

|    |             |             |             |
|----|-------------|-------------|-------------|
| H  | 2.96257700  | -3.99105600 | -1.87585900 |
| H  | 1.31880500  | -4.35844800 | -1.31680900 |
| H  | 3.54538000  | -2.88716700 | 0.20417200  |
| H  | 2.62018700  | -4.30879600 | 0.73550600  |
| C  | -0.96987900 | 0.61508500  | -0.62358600 |
| C  | -0.69630600 | 1.93546000  | -0.32268800 |
| C  | -1.49560900 | 3.16145600  | -0.32395500 |
| C  | -0.86895400 | 4.42310900  | -0.32030900 |
| C  | -1.62301200 | 5.59453000  | -0.33289200 |
| C  | -3.01850100 | 5.53927100  | -0.35035700 |
| C  | -3.65291200 | 4.29433200  | -0.34523100 |
| C  | -2.90259100 | 3.12141900  | -0.32376800 |
| H  | 0.21450300  | 4.47609200  | -0.31558900 |
| H  | -1.11618200 | 6.55633400  | -0.33370600 |
| H  | -3.60477700 | 6.45413700  | -0.36283600 |
| H  | -4.73814800 | 4.23393800  | -0.34638200 |
| H  | -3.41172800 | 2.16163600  | -0.28779900 |
| Cu | -2.67733100 | 0.08330300  | -1.36787900 |
| Br | -4.48248800 | -0.81267200 | -2.53583500 |
| N  | -0.80054700 | -2.22942300 | -0.70779400 |
| H  | -1.51761400 | -1.68941500 | -0.21320200 |
| H  | -0.75792600 | -3.15093200 | -0.27467000 |
| H  | -1.28913700 | -2.29764700 | -2.28331500 |
| N  | -1.66651300 | -2.25645800 | -3.31756100 |
| H  | -2.65927300 | -1.90608000 | -3.27150700 |
| H  | -1.61330200 | -3.16864700 | -3.77506800 |
| H  | -1.09819100 | -1.58256500 | -3.83557300 |

B3LYP/6-31G\* (Lan12DZ for Cu)

Thermal correction to Gibbs Free Energy = 0.326816 a.u.

Sum of electronic and thermal Free Energies = -4561.831194 a.u.

M06-2x/6-311++G\*\* (Lan12DZ for Cu)

Energy = -4564.8622557 a.u.

No imaginary frequency

#### ts4-NH<sub>3</sub>

|   |             |            |             |
|---|-------------|------------|-------------|
| O | -0.21148400 | 1.99572900 | 0.05546700  |
| C | -1.00087700 | 0.86653000 | 0.08131700  |
| C | -2.38252500 | 1.20382500 | -0.17104400 |
| C | -3.49695600 | 0.45905700 | -0.00071400 |
| C | -4.86425500 | 0.88196400 | -0.31039500 |
| C | -5.17085100 | 2.01975500 | -1.08397500 |
| C | -6.49148000 | 2.37735400 | -1.33777800 |
| C | -7.54464100 | 1.60679400 | -0.83426300 |
| C | -7.26081200 | 0.46983800 | -0.07556300 |
| C | -5.93814900 | 0.11278700 | 0.17890700  |

|    |             |             |             |
|----|-------------|-------------|-------------|
| C  | -0.17277000 | -0.23069300 | 0.29718600  |
| C  | -0.55815200 | -1.69211400 | 0.43838700  |
| S  | -1.66490800 | -1.96373100 | 1.91476900  |
| C  | -2.40765900 | -3.50627000 | 1.26001900  |
| C  | -2.83750700 | -3.25399900 | -0.18746400 |
| S  | -1.53463600 | -2.30444100 | -1.07564000 |
| H  | -2.48543400 | 2.22671500  | -0.52716600 |
| H  | -3.40474600 | -0.52463400 | 0.44332600  |
| H  | -4.36864300 | 2.61772500  | -1.50620500 |
| H  | -6.70231300 | 3.25721300  | -1.94002500 |
| H  | -8.57428700 | 1.88705500  | -1.03861000 |
| H  | -8.06989600 | -0.13969600 | 0.31836900  |
| H  | -5.72422200 | -0.77031300 | 0.77713000  |
| H  | -3.26765300 | -3.74835500 | 1.89288700  |
| H  | -1.69684800 | -4.33685600 | 1.32716300  |
| H  | -3.77289700 | -2.68761200 | -0.21632200 |
| H  | -2.98917600 | -4.20077700 | -0.71596800 |
| C  | 1.20060800  | 0.25923700  | 0.39367600  |
| C  | 1.08427400  | 1.63448200  | 0.25310500  |
| C  | 2.04238200  | 2.73860400  | 0.32512300  |
| C  | 1.59604400  | 4.07323300  | 0.27792900  |
| C  | 2.50212800  | 5.12806500  | 0.36150800  |
| C  | 3.86927000  | 4.87744900  | 0.49652300  |
| C  | 4.32402000  | 3.55672600  | 0.54580200  |
| C  | 3.42299400  | 2.49943900  | 0.46070600  |
| H  | 0.53555100  | 4.27573300  | 0.17681800  |
| H  | 2.13717600  | 6.15092300  | 0.32098700  |
| H  | 4.57439500  | 5.70177500  | 0.55757400  |
| H  | 5.38595000  | 3.34730800  | 0.64103100  |
| H  | 3.79460400  | 1.47808700  | 0.48305800  |
| Cu | 2.78100600  | -0.61900700 | -0.45360600 |
| Br | 4.50168400  | -1.87432900 | -1.22218700 |
| N  | 0.63703500  | -2.51704600 | 0.64817200  |
| H  | 1.26647300  | -2.42472300 | -0.15566700 |
| H  | 0.36136500  | -3.49725000 | 0.66993600  |
| H  | 1.65268800  | -1.89337600 | 2.21452300  |
| H  | 1.90732600  | -0.32727100 | 1.59635500  |
| N  | 2.16915400  | -1.05684200 | 2.55958500  |
| H  | 3.16958400  | -1.25255000 | 2.61335300  |
| H  | 1.81362300  | -0.73666400 | 3.46053000  |

B3LYP/6-31G\* (Lan12DZ for Cu)

Thermal correction to Gibbs Free Energy = 0.321740 a.u.

Sum of electronic and thermal Free Energies = -4561.820721 a.u.

M06-2x/6-311++G\*\* (Lan12DZ for Cu)

Energy = -4564.8473144 a.u.

Number of Imaginary Frequencies = 1

Lowest Frequency = 892.83i

**in7-NH<sub>3</sub>**

|    |             |             |             |
|----|-------------|-------------|-------------|
| O  | 0.00281600  | 1.91413300  | 0.19053600  |
| C  | -0.86072100 | 0.83962500  | 0.32143800  |
| C  | -2.22747700 | 1.20909500  | 0.03947000  |
| C  | -3.21167800 | 0.38861100  | -0.38672500 |
| C  | -4.59256400 | 0.77556700  | -0.67637500 |
| C  | -5.15354300 | 2.00317600  | -0.27159000 |
| C  | -6.47076300 | 2.32316000  | -0.58562400 |
| C  | -7.26490700 | 1.42496800  | -1.30623400 |
| C  | -6.72874200 | 0.19975400  | -1.70669800 |
| C  | -5.41001600 | -0.12097400 | -1.39117600 |
| C  | -0.12239600 | -0.28550300 | 0.66044300  |
| C  | -0.51975600 | -1.69990200 | 1.03430600  |
| S  | -1.93624700 | -1.61047200 | 2.31084200  |
| C  | -2.54326400 | -3.28452100 | 1.90631100  |
| C  | -2.71551300 | -3.34817700 | 0.39033900  |
| S  | -1.19892800 | -2.68864400 | -0.42141800 |
| H  | -2.41197200 | 2.27644200  | 0.13951500  |
| H  | -2.96265300 | -0.64988300 | -0.57905000 |
| H  | -4.55944900 | 2.70355500  | 0.30822200  |
| H  | -6.88443000 | 3.27441400  | -0.26145800 |
| H  | -8.29377800 | 1.67749800  | -1.54729600 |
| H  | -7.33715300 | -0.50627500 | -2.26542900 |
| H  | -4.99357900 | -1.07256900 | -1.71356700 |
| H  | -3.49672900 | -3.43315100 | 2.42303000  |
| H  | -1.83565100 | -4.04369900 | 2.25697100  |
| H  | -3.58727800 | -2.76080700 | 0.08682200  |
| H  | -2.84812800 | -4.37925000 | 0.04533300  |
| C  | 1.26309500  | 0.13900400  | 0.68462000  |
| C  | 1.27954500  | 1.50440500  | 0.40528000  |
| C  | 2.32517000  | 2.52585800  | 0.44484100  |
| C  | 1.99100700  | 3.88904700  | 0.37460900  |
| C  | 2.98940300  | 4.85939100  | 0.42978900  |
| C  | 4.32930900  | 4.48753300  | 0.55557100  |
| C  | 4.66855500  | 3.13284500  | 0.62404500  |
| C  | 3.67768900  | 2.15814100  | 0.56779500  |
| H  | 0.95072400  | 4.18010500  | 0.27778400  |
| H  | 2.71829100  | 5.90983400  | 0.37213400  |
| H  | 5.10563000  | 5.24638100  | 0.59345600  |
| H  | 5.70924700  | 2.83417700  | 0.71089200  |
| H  | 3.95460500  | 1.10804300  | 0.59794400  |
| Cu | 1.80432700  | -0.09428500 | -1.34181600 |

|    |            |             |             |
|----|------------|-------------|-------------|
| Br | 2.52020200 | -0.60851500 | -3.41413200 |
| N  | 0.64847800 | -2.39758300 | 1.49568500  |
| H  | 0.47673800 | -3.39584400 | 1.55620100  |
| H  | 0.96598300 | -2.04061400 | 2.40940500  |
| H  | 2.07339000 | -0.44272900 | 1.10223700  |
| N  | 1.20577400 | -1.25425000 | 4.28010100  |
| H  | 0.20646000 | -1.20942800 | 4.47830600  |
| H  | 1.57734400 | -0.31778100 | 4.43184700  |
| H  | 1.62229600 | -1.85180000 | 4.99260200  |

B3LYP/6-31G\* (Lan12DZ for Cu)

Thermal correction to Gibbs Free Energy = 0.319924 a.u.

Sum of electronic and thermal Free Energies = -4561.852925 a.u.

M06-2x/6-311++G\*\* (Lan12DZ for Cu)

Energy = -4564.878582 a.u.

No imaginary frequency

**in8-NH<sub>3</sub>**

|   |             |             |             |
|---|-------------|-------------|-------------|
| O | -0.29586200 | 2.24530800  | 0.14577600  |
| C | -1.03928400 | 1.08990500  | 0.10376900  |
| C | -2.43327000 | 1.35658700  | -0.15150000 |
| C | -3.49541200 | 0.54611700  | 0.05188300  |
| C | -4.89038800 | 0.86776700  | -0.25367300 |
| C | -5.27364300 | 1.94060800  | -1.08359200 |
| C | -6.61683900 | 2.20858000  | -1.32970000 |
| C | -7.61482600 | 1.40940900  | -0.76235000 |
| C | -7.25385200 | 0.33436800  | 0.05196900  |
| C | -5.90883100 | 0.06658000  | 0.29885800  |
| C | -0.17672600 | 0.00761400  | 0.27446500  |
| C | -0.44938200 | -1.47761600 | 0.24096500  |
| S | -1.48571700 | -2.00024900 | 1.71034900  |
| C | -2.18646300 | -3.47720800 | 0.88246200  |
| C | -2.66059200 | -3.05159300 | -0.50645800 |
| S | -1.36267300 | -2.02269700 | -1.30607100 |
| H | -2.59727400 | 2.36615600  | -0.52251800 |
| H | -3.33088300 | -0.41513000 | 0.52670000  |
| H | -4.51288800 | 2.55546500  | -1.55533500 |
| H | -6.88842400 | 3.03917600  | -1.97585000 |
| H | -8.66220700 | 1.61931300  | -0.96080600 |
| H | -8.02024100 | -0.29597000 | 0.49531600  |
| H | -5.63401500 | -0.76699200 | 0.94161500  |
| H | -3.01874800 | -3.83356800 | 1.49817200  |
| H | -1.44164400 | -4.27824100 | 0.82153700  |
| H | -3.58983500 | -2.47929900 | -0.44112600 |
| H | -2.82943500 | -3.92319700 | -1.14731700 |
| C | 1.13035900  | 0.56967600  | 0.43890100  |

|    |            |             |             |
|----|------------|-------------|-------------|
| C  | 1.01445100 | 1.93127500  | 0.34576900  |
| C  | 1.97622700 | 3.02270200  | 0.42252300  |
| C  | 1.54691900 | 4.35087300  | 0.59368300  |
| C  | 2.47602100 | 5.38569000  | 0.67647500  |
| C  | 3.84376600 | 5.11534400  | 0.59196500  |
| C  | 4.27786600 | 3.79847900  | 0.41475800  |
| C  | 3.35538800 | 2.75966300  | 0.32680300  |
| H  | 0.48498500 | 4.56249300  | 0.66365500  |
| H  | 2.12988600 | 6.40723900  | 0.80919900  |
| H  | 4.56600600 | 5.92451600  | 0.65555300  |
| H  | 5.33886600 | 3.58031100  | 0.33026800  |
| H  | 3.70202800 | 1.74506300  | 0.15194200  |
| N  | 0.84334500 | -2.21474300 | 0.24434100  |
| H  | 0.62905200 | -3.21014400 | 0.18071600  |
| H  | 1.33014100 | -2.07621800 | 1.15905700  |
| H  | 2.05167500 | 0.03075100  | 0.59391900  |
| Cu | 2.17301000 | -1.88163100 | -1.20041700 |
| Br | 3.87107200 | -1.56197900 | -2.63745700 |
| N  | 2.22414600 | -1.82191200 | 2.83966900  |
| H  | 2.15679600 | -0.84897700 | 3.13514400  |
| H  | 3.21323900 | -2.06712000 | 2.85601200  |
| H  | 1.76666900 | -2.37596100 | 3.56205800  |

B3LYP/6-31G\* (Lan12DZ for Cu)

Thermal correction to Gibbs Free Energy = 0.319860 a.u.

Sum of electronic and thermal Free Energies = -4561.878333 a.u.

M06-2x/6-311++G\*\* (Lan12DZ for Cu)

Energy = -4564.9016613 a.u.

No imaginary frequency

### ts5-NH<sub>3</sub>

|   |             |             |             |
|---|-------------|-------------|-------------|
| O | -0.28231100 | 2.27412500  | -0.04040000 |
| C | -1.00389500 | 1.10821200  | -0.12218500 |
| C | -2.40249300 | 1.35616000  | -0.36935800 |
| C | -3.44151600 | 0.58196700  | 0.01382000  |
| C | -4.85617100 | 0.85693000  | -0.23886100 |
| C | -5.30274100 | 1.78640600  | -1.19948600 |
| C | -6.66160300 | 2.01882500  | -1.38946500 |
| C | -7.61133300 | 1.32522900  | -0.63214800 |
| C | -7.18726600 | 0.39175300  | 0.31571000  |
| C | -5.82667600 | 0.15848200  | 0.50591600  |
| C | -0.13351400 | 0.03065100  | 0.06526900  |
| C | -0.33723500 | -1.42910200 | -0.06599900 |
| S | -1.54090400 | -1.95556300 | 1.98948600  |
| C | -2.13605400 | -3.44508500 | 1.11553300  |
| C | -2.77936800 | -3.01943300 | -0.20105900 |



|    |             |             |             |
|----|-------------|-------------|-------------|
| S  | -1.62887200 | -2.02677000 | -1.24771200 |
| H  | -2.58795500 | 2.31476500  | -0.85021100 |
| H  | -3.23074300 | -0.29732600 | 0.61441600  |
| H  | -4.57998600 | 2.31397200  | -1.81506700 |
| H  | -6.98391900 | 2.73722800  | -2.13860800 |
| H  | -8.67150300 | 1.50627100  | -0.78656300 |
| H  | -7.91665400 | -0.15533200 | 0.90723500  |
| H  | -5.50025000 | -0.56270800 | 1.25176000  |
| H  | -2.88349300 | -3.95345000 | 1.73487000  |
| H  | -1.31647200 | -4.15150200 | 0.93404700  |
| H  | -3.68031400 | -2.43037500 | -0.00859900 |
| H  | -3.05652800 | -3.88939000 | -0.80719800 |
| C  | 1.15135000  | 0.61971200  | 0.32533300  |
| C  | 1.02205400  | 1.97620300  | 0.23327200  |
| C  | 1.96757100  | 3.07771700  | 0.35858600  |
| C  | 1.51638800  | 4.40242700  | 0.49403800  |
| C  | 2.42984200  | 5.44646500  | 0.62378300  |
| C  | 3.80228700  | 5.18710400  | 0.62189300  |
| C  | 4.25760800  | 3.87296700  | 0.48040400  |
| C  | 3.35231900  | 2.82383000  | 0.34557400  |
| H  | 0.45018400  | 4.60417300  | 0.50019500  |
| H  | 2.06782200  | 6.46578400  | 0.72867000  |
| H  | 4.51257000  | 6.00320800  | 0.72249500  |
| H  | 5.32351200  | 3.66344600  | 0.46171400  |
| H  | 3.72085700  | 1.81153400  | 0.20055500  |
| N  | 0.78946600  | -2.20257000 | -0.08569400 |
| H  | 0.54280300  | -3.13166800 | -0.42104800 |
| H  | 1.41703100  | -2.37372800 | 1.47027500  |
| H  | 2.07779000  | 0.10219200  | 0.52732900  |
| Cu | 2.61619100  | -1.78163800 | -0.64008900 |
| Br | 4.82454000  | -1.37277900 | -0.85100500 |
| N  | 1.42367500  | -2.46432200 | 2.55697500  |
| H  | 1.91804200  | -1.67695500 | 2.98190400  |
| H  | 1.84078600  | -3.34571100 | 2.86111600  |
| H  | 0.37358800  | -2.41164500 | 2.75090000  |

B3LYP/6-31G\* (Lanl2DZ for Cu)

Thermal correction to Gibbs Free Energy = 0.323225 a.u.

Sum of electronic and thermal Free Energies = -4561.831048 a.u.

M06-2x/6-311++G\*\* (Lanl2DZ for Cu)

Energy = -4564.8554895 a.u.

Number of Imaginary Frequencies = 1

Lowest Frequency = 212.97i

**in9-NH<sub>3</sub>**

|   |             |            |             |
|---|-------------|------------|-------------|
| O | -0.22792200 | 2.45852700 | -0.02423000 |
|---|-------------|------------|-------------|

|    |             |             |             |
|----|-------------|-------------|-------------|
| C  | -0.90936400 | 1.27735700  | -0.13696900 |
| C  | -2.32707200 | 1.45461000  | 0.06445800  |
| C  | -3.26377200 | 0.52163400  | 0.35003400  |
| C  | -4.68830000 | 0.77648300  | 0.56800300  |
| C  | -5.26380000 | 2.06410100  | 0.56496400  |
| C  | -6.62683300 | 2.23581500  | 0.78061600  |
| C  | -7.45335100 | 1.12880800  | 1.00407400  |
| C  | -6.90083400 | -0.15283800 | 1.01028900  |
| C  | -5.53472600 | -0.32666100 | 0.79622600  |
| C  | 0.02775800  | 0.26318000  | -0.36123800 |
| C  | -0.10355300 | -1.16726500 | -0.63543800 |
| S  | -3.04970700 | -3.50649500 | 0.99333900  |
| C  | -1.63021600 | -4.09434000 | -0.01608900 |
| C  | -1.52729700 | -3.50448800 | -1.43179500 |
| S  | -1.47181100 | -1.67205900 | -1.63014700 |
| H  | -2.61076000 | 2.50311400  | 0.01639900  |
| H  | -2.97130700 | -0.52137000 | 0.43087400  |
| H  | -4.64230900 | 2.93880800  | 0.39764600  |
| H  | -7.04936800 | 3.23707300  | 0.77616300  |
| H  | -8.51778000 | 1.26796700  | 1.17229400  |
| H  | -7.53337200 | -1.01952100 | 1.18244100  |
| H  | -5.10623600 | -1.32533700 | 0.79781200  |
| H  | -1.71538500 | -5.17948000 | -0.14119500 |
| H  | -0.72618300 | -3.90845000 | 0.56692700  |
| H  | -2.42069700 | -3.76168800 | -2.01090500 |
| H  | -0.67620700 | -3.95215000 | -1.96111500 |
| C  | 1.31732700  | 0.89570600  | -0.35216400 |
| C  | 1.11812600  | 2.23167100  | -0.15287600 |
| C  | 2.00653100  | 3.38343500  | -0.07287500 |
| C  | 1.49059800  | 4.68932800  | 0.00027600  |
| C  | 2.35066000  | 5.78306800  | 0.07230600  |
| C  | 3.73432200  | 5.59503100  | 0.07179100  |
| C  | 4.25501200  | 4.29959400  | 0.00201100  |
| C  | 3.40180600  | 3.20253400  | -0.06772300 |
| H  | 0.41626100  | 4.83927200  | -0.00029900 |
| H  | 1.93729700  | 6.78640200  | 0.12858000  |
| H  | 4.40255800  | 6.44966800  | 0.12892300  |
| H  | 5.33003900  | 4.14273800  | 0.00823600  |
| H  | 3.81745200  | 2.19983700  | -0.10724000 |
| N  | 0.83151700  | -1.97758300 | -0.22412400 |
| H  | 0.74946600  | -2.91621600 | -0.60545200 |
| H  | -0.12042500 | -2.52194200 | 3.52635300  |
| H  | 2.25780500  | 0.39664400  | -0.53013800 |
| Cu | 1.80844900  | -1.84036100 | 1.43453000  |
| Br | 2.57212800  | -1.91146800 | 3.55092600  |

|   |             |             |            |
|---|-------------|-------------|------------|
| N | -1.13234100 | -2.67186600 | 3.58113100 |
| H | -1.51228300 | -1.83275300 | 4.01909600 |
| H | -1.26961200 | -3.42830000 | 4.25130400 |
| H | -2.28173300 | -3.09625800 | 2.07056300 |

B3LYP/6-31G\* (Lan12DZ for Cu)

Thermal correction to Gibbs Free Energy = 0.317367 a.u.

Sum of electronic and thermal Free Energies = -4561.880673 a.u.

M06-2x/6-311++G\*\* (Lan12DZ for Cu)

Energy = -4564.8805807 a.u.

No imaginary frequency

**in10-NH<sub>3</sub>**

|   |             |             |             |
|---|-------------|-------------|-------------|
| O | -2.54264900 | 1.49228900  | -0.13096100 |
| C | -1.34535200 | 0.86837900  | 0.09051600  |
| C | -0.28625800 | 1.75606400  | 0.49951400  |
| C | 0.89086600  | 1.40053100  | 1.06525000  |
| C | 1.95676600  | 2.31301300  | 1.47679600  |
| C | 2.04117300  | 3.64864700  | 1.03583800  |
| C | 3.06585100  | 4.47918500  | 1.47822500  |
| C | 4.03361400  | 3.99780500  | 2.36624300  |
| C | 3.97321400  | 2.67242000  | 2.80103600  |
| C | 2.94941900  | 1.83874100  | 2.35620000  |
| C | -1.52116200 | -0.49777800 | -0.11574500 |
| C | -0.50865800 | -1.56087200 | -0.10683800 |
| S | -0.01746300 | -1.33371600 | 3.63448800  |
| C | -1.21899900 | -2.70844800 | 3.43296000  |
| C | -1.96662000 | -2.75557200 | 2.09725500  |
| S | -0.91161100 | -3.14737600 | 0.64205500  |
| H | -0.52123600 | 2.80613800  | 0.34462500  |
| H | 1.07457700  | 0.35023900  | 1.27429700  |
| H | 1.31894400  | 4.02670400  | 0.31864500  |
| H | 3.11946400  | 5.50324800  | 1.11895000  |
| H | 4.83468800  | 4.64879500  | 2.70549000  |
| H | 4.72548000  | 2.28686000  | 3.48399400  |
| H | 2.90393200  | 0.80694300  | 2.69715200  |
| H | -1.94780600 | -2.66890600 | 4.25004200  |
| H | -0.62621100 | -3.61739700 | 3.57076300  |
| H | -2.50488700 | -1.82491800 | 1.90163800  |
| H | -2.70845500 | -3.56191500 | 2.13462200  |
| C | -2.89972600 | -0.68134200 | -0.45726000 |
| C | -3.48418400 | 0.55750800  | -0.47234600 |
| C | -4.82779500 | 1.03404300  | -0.77134400 |
| C | -5.13378200 | 2.40584500  | -0.72080600 |
| C | -6.42219300 | 2.85162800  | -1.00756200 |
| C | -7.42585600 | 1.94264800  | -1.34885700 |

|    |             |             |             |
|----|-------------|-------------|-------------|
| C  | -7.13007200 | 0.57747500  | -1.40227000 |
| C  | -5.84540700 | 0.12533700  | -1.11644100 |
| H  | -4.35642400 | 3.11575200  | -0.45975200 |
| H  | -6.64156000 | 3.91502900  | -0.96623200 |
| H  | -8.42911900 | 2.29358400  | -1.57346600 |
| H  | -7.90317600 | -0.13781000 | -1.66939100 |
| H  | -5.62796100 | -0.93795900 | -1.16402300 |
| N  | 0.60774200  | -1.45300400 | -0.73616300 |
| H  | 1.26803800  | -2.25107400 | -0.64553400 |
| H  | -0.92150900 | -0.33027000 | 3.65554200  |
| H  | -3.36555100 | -1.62257500 | -0.71120700 |
| H  | 2.65633100  | -4.28051300 | -1.35113100 |
| Cu | 1.24576300  | -0.11827300 | -1.97334000 |
| Br | 2.11982100  | 1.25279300  | -3.52544200 |
| N  | 2.82941200  | -3.36252900 | -0.94486500 |
| H  | 3.44186700  | -3.50440200 | -0.14337100 |
| H  | 3.36461000  | -2.83393100 | -1.63335500 |

B3LYP/6-31G\* (Lan12DZ for Cu)

Thermal correction to Gibbs Free Energy = 0.313123 a.u.

Sum of electronic and thermal Free Energies = -4561.887252 a.u.

M06-2x/6-311++G\*\* (Lan12DZ for Cu)

Energy = -4564.8905953 a.u.

No imaginary frequency

### ts6-NH<sub>3</sub>

|   |             |             |             |
|---|-------------|-------------|-------------|
| O | -2.58938800 | 1.51514300  | -0.09027900 |
| C | -1.34265300 | 0.95724400  | -0.00155300 |
| C | -0.35541600 | 1.84568300  | 0.55336200  |
| C | 0.98614800  | 1.66894000  | 0.60637500  |
| C | 1.95245500  | 2.59805200  | 1.19230600  |
| C | 1.58674700  | 3.62580600  | 2.08497900  |
| C | 2.54429600  | 4.49105600  | 2.60482900  |
| C | 3.89018600  | 4.34885200  | 2.25053000  |
| C | 4.26940100  | 3.33044900  | 1.37381400  |
| C | 3.31352400  | 2.46000100  | 0.85319000  |
| C | -1.42828200 | -0.36433100 | -0.44762300 |
| C | -0.35365400 | -1.33657100 | -0.52242900 |
| S | 0.44146600  | -2.89761600 | 3.41688100  |
| C | -1.31145700 | -3.38486200 | 3.09165700  |
| C | -1.98815100 | -2.77057700 | 1.86367500  |
| S | -1.34243900 | -3.28020900 | 0.21787000  |
| H | -0.78943400 | 2.76828000  | 0.93255200  |
| H | 1.41422200  | 0.77961600  | 0.15454000  |
| H | 0.54924800  | 3.73475800  | 2.38863300  |
| H | 2.24329400  | 5.27472700  | 3.29521300  |

|    |             |             |             |
|----|-------------|-------------|-------------|
| H  | 4.63600600  | 5.02498700  | 2.65977100  |
| H  | 5.31153700  | 3.21182200  | 1.09040100  |
| H  | 3.61775000  | 1.68122700  | 0.15712000  |
| H  | -1.89101900 | -3.13690300 | 3.98744800  |
| H  | -1.27990500 | -4.47590000 | 3.01347400  |
| H  | -1.95870800 | -1.67629700 | 1.92225600  |
| H  | -3.04592000 | -3.05678600 | 1.90260000  |
| C  | -2.79279200 | -0.58148200 | -0.81911800 |
| C  | -3.46455700 | 0.58931000  | -0.59894800 |
| C  | -4.84710000 | 1.00674900  | -0.78958000 |
| C  | -5.25297600 | 2.32008300  | -0.49184100 |
| C  | -6.57830300 | 2.70791300  | -0.67752600 |
| C  | -7.52053900 | 1.79828700  | -1.16197300 |
| C  | -7.12542300 | 0.49109600  | -1.46109700 |
| C  | -5.80350200 | 0.09691100  | -1.27755300 |
| H  | -4.52410500 | 3.03131000  | -0.11825100 |
| H  | -6.87511700 | 3.72683400  | -0.44386700 |
| H  | -8.55292900 | 2.10403800  | -1.30661100 |
| H  | -7.85030600 | -0.22439700 | -1.83972300 |
| H  | -5.50894300 | -0.92154600 | -1.51394500 |
| N  | 0.81197300  | -1.41900800 | -0.82863500 |
| H  | 1.66226500  | -2.87902300 | -0.17109000 |
| H  | 0.26665600  | -1.56039600 | 3.34630600  |
| H  | -3.19301500 | -1.50643400 | -1.20377400 |
| H  | 0.61147400  | -3.98098000 | 0.42273800  |
| Cu | 2.43590200  | -0.81131500 | -1.58069900 |
| Br | 4.51007900  | -0.23923000 | -2.21363300 |
| N  | 1.66419600  | -3.79671100 | 0.35519500  |
| H  | 2.00881000  | -3.65228500 | 1.30917600  |
| H  | 2.18396800  | -4.52304600 | -0.14010000 |

B3LYP/6-31G\* (Lan12DZ for Cu)

Thermal correction to Gibbs Free Energy = 0.316201 a.u.

Sum of electronic and thermal Free Energies = -4561.845209 a.u.

M06-2x/6-311++G\*\* (Lan12DZ for Cu)

Energy = -4564.8491324 a.u.

Number of Imaginary Frequencies = 1

Lowest Frequency = 131.22i

HOAc-assisted reaction

**in5-HOAc**

|   |             |            |             |
|---|-------------|------------|-------------|
| O | -0.10846300 | 1.23518200 | -1.15578300 |
| C | 0.96342300  | 0.64003600 | -0.55455800 |
| C | 2.22302000  | 1.07234800 | -1.11788300 |
| C | 3.40851900  | 1.17146100 | -0.47825800 |

|    |             |             |             |
|----|-------------|-------------|-------------|
| C  | 4.67432500  | 1.61758000  | -1.06171600 |
| C  | 4.89020200  | 1.72186900  | -2.45057600 |
| C  | 6.11066800  | 2.16382600  | -2.95242000 |
| C  | 7.15260700  | 2.50560400  | -2.08412100 |
| C  | 6.96089100  | 2.39754000  | -0.70542700 |
| C  | 5.73831500  | 1.95620300  | -0.20319700 |
| C  | 0.48157300  | -0.19593100 | 0.44938500  |
| C  | 1.29213200  | -1.13182400 | 1.31432700  |
| S  | 2.50769400  | -2.12631100 | 0.34817300  |
| C  | 3.60700900  | -2.47146600 | 1.77318100  |
| C  | 3.81390000  | -1.16447800 | 2.53514300  |
| S  | 2.19399400  | -0.30831000 | 2.74058400  |
| H  | 2.13788000  | 1.41333100  | -2.14799900 |
| H  | 3.43907000  | 0.94510700  | 0.58352700  |
| H  | 4.10175500  | 1.43729600  | -3.14119400 |
| H  | 6.25473100  | 2.23425800  | -4.02736900 |
| H  | 8.10516000  | 2.84648700  | -2.48014400 |
| H  | 7.76325400  | 2.65865400  | -0.02044200 |
| H  | 5.59167000  | 1.88663400  | 0.87270400  |
| H  | 4.55108900  | -2.84536300 | 1.36395000  |
| H  | 3.18930300  | -3.25175600 | 2.41969300  |
| H  | 4.49867400  | -0.51024700 | 1.98945600  |
| H  | 4.22032100  | -1.34726800 | 3.53492400  |
| C  | -0.96520200 | -0.05863400 | 0.50789200  |
| C  | -1.25067400 | 0.83262600  | -0.50912900 |
| C  | -2.49270700 | 1.41722200  | -1.01702000 |
| C  | -2.46288800 | 2.39476700  | -2.02997600 |
| C  | -3.64362100 | 2.95604900  | -2.51150000 |
| C  | -4.87882700 | 2.55687100  | -1.99701300 |
| C  | -4.92127200 | 1.58490300  | -0.99377200 |
| C  | -3.74448500 | 1.02044600  | -0.51058300 |
| H  | -1.50786700 | 2.71463900  | -2.43207800 |
| H  | -3.59685200 | 3.71150000  | -3.29157500 |
| H  | -5.79827300 | 2.99748100  | -2.37259200 |
| H  | -5.87518100 | 1.26240200  | -0.58516500 |
| H  | -3.79588000 | 0.25853400  | 0.26257200  |
| Cu | -2.11106800 | -0.54967900 | 2.00182200  |
| Br | -2.70004900 | -1.52997000 | 3.97951100  |
| N  | 0.34798500  | -2.14211700 | 1.96114500  |
| H  | -0.35927400 | -1.69472400 | 2.58366400  |
| H  | 0.88295700  | -2.79876700 | 2.53443600  |
| H  | -0.18782300 | -2.69095300 | 1.23274600  |
| C  | -2.64852500 | -4.67883300 | -1.28656600 |
| C  | -1.93853000 | -3.56315700 | -0.56556500 |
| O  | -0.98951900 | -3.75519600 | 0.19232300  |

|   |             |             |             |
|---|-------------|-------------|-------------|
| O | -2.45293900 | -2.37148800 | -0.83201600 |
| H | -2.73999100 | -4.44337600 | -2.35099900 |
| H | -2.10741300 | -5.61486800 | -1.14684100 |
| H | -3.66306900 | -4.77732100 | -0.88451900 |
| H | -1.98115400 | -1.65638200 | -0.31860800 |

B3LYP/6-31G\* (Lanl2DZ for Cu)

Thermal correction to Gibbs Free Energy = 0.346585 a.u.

Sum of electronic and thermal Free Energies = -4734.339426 a.u.

M06-2x/6-311++G\*\* (Lanl2DZ for Cu)

Energy = -4737.3762176 a.u.

No imaginary frequency

**ts3-HOAc**

|   |             |             |             |
|---|-------------|-------------|-------------|
| O | -0.57093800 | 2.14318800  | 0.05926900  |
| C | -1.29337300 | 0.97229000  | 0.06874300  |
| C | -2.71355400 | 1.23687600  | 0.02423400  |
| C | -3.72021300 | 0.41543900  | -0.34406100 |
| C | -5.14331900 | 0.75857600  | -0.36408300 |
| C | -5.67757100 | 1.88384800  | 0.29511400  |
| C | -7.03819600 | 2.16891600  | 0.23215400  |
| C | -7.90466100 | 1.33628300  | -0.48358300 |
| C | -7.39511900 | 0.21065900  | -1.13344500 |
| C | -6.03279500 | -0.07482400 | -1.06956500 |
| C | -0.39299400 | -0.08308700 | 0.14595200  |
| C | -0.71107600 | -1.55909400 | 0.23137100  |
| S | -1.77759600 | -1.93925100 | 1.68640200  |
| C | -2.42299300 | -3.51248000 | 1.00484100  |
| C | -2.83154700 | -3.26699700 | -0.44687100 |
| S | -1.52947400 | -2.28029900 | -1.30200100 |
| H | -2.94334100 | 2.26719800  | 0.28742300  |
| H | -3.47478200 | -0.57550200 | -0.70682300 |
| H | -5.02554600 | 2.52872000  | 0.87693500  |
| H | -7.42807600 | 3.04059700  | 0.75105400  |
| H | -8.96675900 | 1.56066600  | -0.52746800 |
| H | -8.05850100 | -0.44510000 | -1.69105300 |
| H | -5.64116700 | -0.94776200 | -1.58747800 |
| H | -3.28550500 | -3.79719000 | 1.61595000  |
| H | -1.67860700 | -4.31272700 | 1.08427600  |
| H | -3.78069900 | -2.72562600 | -0.48740600 |
| H | -2.94067300 | -4.20927400 | -0.99308900 |
| C | 0.95676800  | 0.47618000  | 0.17390000  |
| C | 0.75446600  | 1.84928300  | 0.10950000  |
| C | 1.66135800  | 2.99719200  | 0.10316400  |
| C | 1.16261600  | 4.29553900  | -0.11098000 |
| C | 2.02401100  | 5.39030000  | -0.12740900 |

|    |            |             |             |
|----|------------|-------------|-------------|
| C  | 3.39454400 | 5.21223900  | 0.07142000  |
| C  | 3.89758100 | 3.92692700  | 0.29248200  |
| C  | 3.04382700 | 2.82778900  | 0.30897300  |
| H  | 0.09942600 | 4.43966200  | -0.26943000 |
| H  | 1.62227500 | 6.38531500  | -0.29884400 |
| H  | 4.06539800 | 6.06676400  | 0.05556200  |
| H  | 4.96134900 | 3.77827000  | 0.45616200  |
| H  | 3.44541700 | 1.84041000  | 0.50889400  |
| Cu | 2.27027300 | -0.31860200 | -1.11795000 |
| Br | 3.05861100 | -2.10695200 | -2.29489000 |
| N  | 0.57688200 | -2.33959900 | 0.39876200  |
| H  | 1.20742400 | -2.22926500 | -0.42313200 |
| H  | 0.35667600 | -3.33657000 | 0.45141700  |
| H  | 1.13810900 | -2.08318200 | 1.31751800  |
| C  | 3.74930100 | -1.08284800 | 3.86002500  |
| C  | 2.75393700 | -1.04497000 | 2.71921800  |
| O  | 1.93740600 | -1.98563800 | 2.57989300  |
| O  | 2.83225600 | -0.01498000 | 1.95064800  |
| H  | 3.67690200 | -0.16136900 | 4.44624300  |
| H  | 3.56974600 | -1.95019600 | 4.49701900  |
| H  | 4.76500900 | -1.12910400 | 3.45204600  |
| H  | 1.96741600 | 0.09427200  | 1.07051300  |

B3LYP/6-31G\* (Lan12DZ for Cu)

Thermal correction to Gibbs Free Energy = 0.341050 a.u.

Sum of electronic and thermal Free Energies = -4734.333926 a.u.

M06-2x/6-311++G\*\* (Lan12DZ for Cu)

Energy = -4737.3658895 a.u.

Number of Imaginary Frequencies = 1

Lowest Frequency = 1155.85i

### in6-HOAc

|   |             |             |             |
|---|-------------|-------------|-------------|
| O | -0.45811400 | 2.31070800  | -0.09010600 |
| C | -1.23239400 | 1.16898900  | -0.03141000 |
| C | -2.62505100 | 1.43329100  | -0.30481200 |
| C | -3.67377800 | 0.71232100  | 0.14633400  |
| C | -5.08604000 | 0.97200300  | -0.13544700 |
| C | -5.52133600 | 1.82154500  | -1.17181200 |
| C | -6.87784700 | 2.04391000  | -1.38755700 |
| C | -7.83462000 | 1.41928700  | -0.58048800 |
| C | -7.42137500 | 0.56481600  | 0.44327900  |
| C | -6.06291000 | 0.34179500  | 0.65930100  |
| C | -0.41376300 | 0.08721100  | 0.25466100  |
| C | -0.70330100 | -1.39483100 | 0.33934700  |
| S | -1.53148500 | -1.81581700 | 1.95101000  |
| C | -2.38240500 | -3.30749100 | 1.31302700  |



|    |             |             |             |
|----|-------------|-------------|-------------|
| C  | -3.04326800 | -2.93926200 | -0.01436600 |
| S  | -1.85395400 | -1.99280400 | -1.04584200 |
| H  | -2.79097900 | 2.33985400  | -0.88254800 |
| H  | -3.47434900 | -0.11676700 | 0.81971000  |
| H  | -4.79279500 | 2.29272900  | -1.82495500 |
| H  | -7.19280100 | 2.69944100  | -2.19493600 |
| H  | -8.89288000 | 1.59246500  | -0.75499600 |
| H  | -8.15677500 | 0.07210000  | 1.07355600  |
| H  | -5.74487100 | -0.31738600 | 1.46397100  |
| H  | -3.12548500 | -3.60059700 | 2.06195600  |
| H  | -1.67472700 | -4.13446300 | 1.19397900  |
| H  | -3.94172000 | -2.33855000 | 0.15315800  |
| H  | -3.32282300 | -3.83705600 | -0.57555000 |
| C  | 0.92472000  | 0.62353900  | 0.41492300  |
| C  | 0.83748100  | 1.99603200  | 0.19500900  |
| C  | 1.79337500  | 3.09427600  | 0.35119800  |
| C  | 1.43442000  | 4.40695400  | 0.00090200  |
| C  | 2.35111500  | 5.44520400  | 0.14960300  |
| C  | 3.63090500  | 5.18889700  | 0.64654400  |
| C  | 3.98961600  | 3.88496400  | 1.00094600  |
| C  | 3.08199300  | 2.83935200  | 0.85872900  |
| H  | 0.44109400  | 4.60585300  | -0.38724200 |
| H  | 2.06500400  | 6.45633500  | -0.12606300 |
| H  | 4.34469400  | 6.00018300  | 0.75861900  |
| H  | 4.98156000  | 3.67981200  | 1.39320600  |
| H  | 3.36846600  | 1.83230400  | 1.14882400  |
| Cu | 1.68869700  | 0.68352400  | -1.55637200 |
| Br | 2.44929400  | -0.07939000 | -3.53068300 |
| N  | 0.57647500  | -2.12039300 | 0.26356600  |
| H  | 1.05396100  | -1.87270100 | -0.60894000 |
| H  | 0.37335500  | -3.11672700 | 0.18651900  |
| H  | 1.80905500  | -2.23669200 | 1.60773400  |
| C  | 4.54882300  | -2.10710000 | 3.34713000  |
| C  | 3.45786400  | -1.64707600 | 2.40925900  |
| O  | 2.49876900  | -2.56092500 | 2.26131600  |
| O  | 3.45490100  | -0.56115200 | 1.84771900  |
| H  | 5.29175600  | -1.31806500 | 3.46722000  |
| H  | 4.11936600  | -2.37061100 | 4.31924500  |
| H  | 5.02539200  | -3.00838100 | 2.94699900  |
| H  | 1.77489900  | 0.11089000  | 0.85986700  |

B3LYP/6-31G\* (Lanl2DZ for Cu)

Thermal correction to Gibbs Free Energy = 0.343879 a.u.

Sum of electronic and thermal Free Energies = -4734.371802 a.u.

M06-2x/6-311++G\*\* (Lanl2DZ for Cu)

Energy = -4737.4062221 a.u.

No imaginary frequency

**in7-HOAc**

|   |             |             |             |
|---|-------------|-------------|-------------|
| O | -0.36136300 | 2.69089900  | 1.35537100  |
| C | 0.71693700  | 1.84162400  | 1.38068400  |
| C | 1.88653000  | 2.47626300  | 1.93726800  |
| C | 3.00496600  | 1.89971300  | 2.43034900  |
| C | 4.16397200  | 2.60372800  | 2.98047400  |
| C | 4.38758500  | 3.98436400  | 2.80550400  |
| C | 5.50294000  | 4.60334300  | 3.36149500  |
| C | 6.43032100  | 3.86213500  | 4.10115800  |
| C | 6.23112000  | 2.49145800  | 4.27605000  |
| C | 5.11417800  | 1.87198100  | 3.71919900  |
| C | 0.32317900  | 0.62233600  | 0.82690900  |
| C | 1.12843900  | -0.61616400 | 0.51936300  |
| S | 2.56757200  | -0.14993600 | -0.58811900 |
| C | 3.56908000  | -1.62099300 | -0.15973200 |
| C | 3.57521500  | -1.72055500 | 1.36480800  |
| S | 1.86143100  | -1.49687900 | 2.00966500  |
| H | 1.78166600  | 3.55815000  | 1.98310700  |
| H | 3.05086200  | 0.81759200  | 2.47683900  |
| H | 3.69197300  | 4.57341600  | 2.21501900  |
| H | 5.65552200  | 5.66888800  | 3.21148000  |
| H | 7.30132600  | 4.34888100  | 4.53100000  |
| H | 6.94502400  | 1.90439000  | 4.84765100  |
| H | 4.95920400  | 0.80569500  | 3.86932600  |
| H | 4.57768800  | -1.46047600 | -0.55316700 |
| H | 3.15957000  | -2.52535100 | -0.62212300 |
| H | 4.23028400  | -0.95422700 | 1.78931000  |
| H | 3.92245000  | -2.70453000 | 1.69539600  |
| C | -1.05551900 | 0.77550700  | 0.47211600  |
| C | -1.43453800 | 2.04531000  | 0.81752200  |
| C | -2.68985400 | 2.77618100  | 0.71247900  |
| C | -2.74507000 | 4.15668200  | 0.97502000  |
| C | -3.95035400 | 4.84654000  | 0.86499100  |
| C | -5.11697600 | 4.17533400  | 0.49187600  |
| C | -5.07096200 | 2.80233700  | 0.23357200  |
| C | -3.87120200 | 2.10571200  | 0.34455000  |
| H | -1.84035900 | 4.68120000  | 1.26402900  |
| H | -3.97783500 | 5.91307500  | 1.07160300  |
| H | -6.05584100 | 4.71563500  | 0.40841900  |
| H | -5.97506700 | 2.26887000  | -0.04628700 |
| H | -3.85327900 | 1.03486800  | 0.16365300  |
| N | 0.25571500  | -1.62070000 | -0.14084100 |
| H | 0.82652000  | -2.43498400 | -0.36817700 |

|    |             |             |             |
|----|-------------|-------------|-------------|
| H  | -0.09133800 | -1.24815200 | -1.03913400 |
| H  | -1.68960500 | 0.04372500  | -0.00338700 |
| C  | -0.75776800 | 0.18562800  | -5.01151800 |
| C  | -0.08701300 | -0.15204400 | -3.70608000 |
| O  | -0.65309200 | -0.66248700 | -2.75219100 |
| O  | 1.21278000  | 0.17544800  | -3.70277400 |
| H  | -0.21866400 | -0.28062700 | -5.84226100 |
| H  | -1.79228000 | -0.15713900 | -4.99273600 |
| H  | -0.72766700 | 1.26896900  | -5.17034900 |
| H  | 1.59047500  | -0.03714500 | -2.81831300 |
| Cu | -1.25169600 | -2.39216500 | 0.92109200  |
| Br | -2.99774300 | -3.31709100 | 1.98304100  |

B3LYP/6-31G\* (Lan12DZ for Cu)

Thermal correction to Gibbs Free Energy = 0.344031 a.u.

Sum of electronic and thermal Free Energies = -4734.383752 a.u.

M06-2x/6-311++G\*\* (Lan12DZ for Cu)

Energy = -4737.4211992 a.u.

No imaginary frequency

#### ts4-HOAc

|   |             |             |             |
|---|-------------|-------------|-------------|
| O | -0.37753600 | 2.68749600  | -0.17046800 |
| C | -1.02106400 | 1.51773200  | -0.39833300 |
| C | -2.43199300 | 1.68622100  | -0.60956300 |
| C | -3.38539100 | 0.76701100  | -0.31914400 |
| C | -4.82576100 | 0.93829200  | -0.45134600 |
| C | -5.42715200 | 2.05226200  | -1.07395600 |
| C | -6.81064700 | 2.15207300  | -1.16263300 |
| C | -7.62652800 | 1.14511400  | -0.63262300 |
| C | -7.04739300 | 0.03396500  | -0.01650400 |
| C | -5.66114600 | -0.07092800 | 0.07054800  |
| C | -0.08487300 | 0.46607400  | -0.25352000 |
| C | -0.19553000 | -0.93191500 | -0.53953100 |
| S | -2.31231500 | -2.45284500 | 1.36071200  |
| C | -1.69807600 | -3.70654500 | 0.17579300  |
| C | -1.59031300 | -3.28768800 | -1.31615800 |
| S | -1.34321900 | -1.49908200 | -1.71195500 |
| H | -2.70237900 | 2.69249000  | -0.91964000 |
| H | -3.07218100 | -0.19103800 | 0.08944800  |
| H | -4.80865800 | 2.83637200  | -1.50095000 |
| H | -7.25875500 | 3.01453200  | -1.64824200 |
| H | -8.70749200 | 1.22809100  | -0.70420500 |
| H | -7.67519700 | -0.75101400 | 0.39560700  |
| H | -5.20668700 | -0.93352600 | 0.55164300  |
| H | -2.36738500 | -4.57332200 | 0.19037500  |
| H | -0.73156400 | -4.07632700 | 0.53791600  |

|    |             |             |             |
|----|-------------|-------------|-------------|
| H  | -2.53808300 | -3.47419200 | -1.83113300 |
| H  | -0.82522500 | -3.87942900 | -1.83140200 |
| C  | 1.14747700  | 1.09651700  | 0.16025000  |
| C  | 0.93945800  | 2.43966600  | 0.17095700  |
| C  | 1.78355300  | 3.59301800  | 0.44978500  |
| C  | 1.24937800  | 4.89329100  | 0.45239300  |
| C  | 2.06746200  | 5.98761500  | 0.72516300  |
| C  | 3.42410500  | 5.80312000  | 0.99882700  |
| C  | 3.96205400  | 4.51266000  | 0.99616600  |
| C  | 3.15223000  | 3.41476900  | 0.72324200  |
| H  | 0.19534000  | 5.04043500  | 0.24269000  |
| H  | 1.64235700  | 6.98744800  | 0.72462900  |
| H  | 4.05971900  | 6.65820600  | 1.21078100  |
| H  | 5.01748600  | 4.36044900  | 1.20270200  |
| H  | 3.58414100  | 2.41839500  | 0.71304600  |
| N  | 0.77355600  | -1.76773000 | -0.03962500 |
| H  | 0.56305900  | -2.74658800 | -0.22260100 |
| H  | 0.98775700  | -1.62788400 | 1.09130800  |
| H  | 2.07597200  | 0.59475900  | 0.38702300  |
| C  | 1.59080200  | -2.16161700 | 4.66424000  |
| C  | 0.87535500  | -2.16469600 | 3.32842300  |
| O  | 1.38537400  | -1.48616600 | 2.38877100  |
| O  | -0.20164700 | -2.84309300 | 3.26758900  |
| H  | 2.64559600  | -1.91085000 | 4.53777400  |
| H  | 1.12606000  | -1.40569000 | 5.30883900  |
| H  | 1.47833500  | -3.13075800 | 5.15612600  |
| H  | -1.09401100 | -2.60525400 | 2.38050900  |
| Cu | 2.57920500  | -1.57123400 | -0.89962000 |
| Br | 4.60351200  | -1.46504400 | -1.85194300 |

B3LYP/6-31G\* (Lan12DZ for Cu)

Thermal correction to Gibbs Free Energy = 0.333743 a.u.

Sum of electronic and thermal Free Energies = -4734.344966 a.u.

M06-2x/6-311++G\*\* (Lan12DZ for Cu)

Energy = -4737.3615073 a.u.

Number of Imaginary Frequencies = 1

Lowest Frequency = 1058.56i

### in8-HOAc

|   |             |            |             |
|---|-------------|------------|-------------|
| O | -0.00392000 | 2.87327600 | -0.23394300 |
| C | -0.58825400 | 1.64092900 | -0.28507000 |
| C | -2.01899600 | 1.64187100 | -0.10082200 |
| C | -2.73415400 | 0.61939800 | 0.42061800  |
| C | -4.18495000 | 0.56756800 | 0.59651700  |
| C | -5.06697400 | 1.52257000 | 0.05154000  |
| C | -6.43868700 | 1.42370900 | 0.25940100  |

|   |             |             |             |
|---|-------------|-------------|-------------|
| C | -6.96621200 | 0.36598600  | 1.00860500  |
| C | -6.10748200 | -0.59400600 | 1.54670600  |
| C | -4.73166500 | -0.49642100 | 1.34291000  |
| C | 0.41550000  | 0.68633900  | -0.43019000 |
| C | 0.31078200  | -0.76408500 | -0.61645700 |
| S | -3.47435200 | -3.65007100 | -1.19528400 |
| C | -1.67052300 | -3.78726300 | -0.86840800 |
| C | -0.78384700 | -3.08057600 | -1.90004500 |
| S | -0.83967800 | -1.24374200 | -1.87079300 |
| H | -2.50078400 | 2.57940700  | -0.36835800 |
| H | -2.20177100 | -0.25997600 | 0.77511000  |
| H | -4.67794500 | 2.33875000  | -0.55033900 |
| H | -7.10264700 | 2.16883200  | -0.17056500 |
| H | -8.03882400 | 0.29001700  | 1.16419700  |
| H | -6.50866000 | -1.42170700 | 2.12531000  |
| H | -4.06203400 | -1.24071700 | 1.76705900  |
| H | -1.45973700 | -4.86152800 | -0.91383000 |
| H | -1.46982700 | -3.44569300 | 0.14961500  |
| H | -1.11364400 | -3.32320500 | -2.91457600 |
| H | 0.26068500  | -3.41079300 | -1.82657600 |
| C | 1.65860300  | 1.40145600  | -0.43714500 |
| C | 1.35872800  | 2.73085600  | -0.32077500 |
| C | 2.17429600  | 3.93676300  | -0.28363400 |
| C | 1.59677800  | 5.20657100  | -0.45784500 |
| C | 2.39250600  | 6.34969100  | -0.42708400 |
| C | 3.77046700  | 6.24465000  | -0.22431900 |
| C | 4.34982200  | 4.98536500  | -0.04402100 |
| C | 3.56159700  | 3.83833000  | -0.06835400 |
| H | 0.52700500  | 5.28991300  | -0.61955100 |
| H | 1.93453500  | 7.32552600  | -0.56413600 |
| H | 4.38842500  | 7.13792800  | -0.20065300 |
| H | 5.41867900  | 4.89553600  | 0.12783300  |
| H | 4.01711200  | 2.86736700  | 0.10566300  |
| N | 1.11488900  | -1.56409800 | 0.02899900  |
| H | 1.00976000  | -2.54313800 | -0.22985300 |
| H | 0.51950500  | -1.65722800 | 2.18308400  |
| H | 2.64199200  | 0.97613900  | -0.57612200 |
| C | -1.54719400 | -2.40988600 | 4.52816500  |
| C | -1.04722400 | -2.15458700 | 3.12991000  |
| O | 0.25515100  | -1.83668900 | 3.11183900  |
| O | -1.72921600 | -2.21583700 | 2.11899200  |
| H | -0.90761000 | -3.14290100 | 5.02925600  |
| H | -1.49531600 | -1.48271000 | 5.10935000  |
| H | -2.57691500 | -2.76621500 | 4.49335000  |
| H | -3.63981200 | -2.40367300 | -0.70525200 |

|    |            |             |            |
|----|------------|-------------|------------|
| Cu | 2.77363100 | -1.12207100 | 0.94660900 |
| Br | 4.76309400 | -0.61503100 | 1.84179300 |

B3LYP/6-31G\* (Lan12DZ for Cu)

Thermal correction to Gibbs Free Energy = 0.336551 a.u.

Sum of electronic and thermal Free Energies = -4734.392418 a.u.

M06-2x/6-311++G\*\* (Lan12DZ for Cu)

Energy = -4737.4086095 a.u.

No imaginary frequency

### in9-HOAc

|   |             |             |             |
|---|-------------|-------------|-------------|
| O | -0.22279500 | 2.96601100  | 0.07827300  |
| C | -0.95739100 | 1.81388800  | 0.12024600  |
| C | -2.37119300 | 2.01789800  | 0.30761200  |
| C | -3.25045100 | 1.10911100  | 0.79219600  |
| C | -4.68895200 | 1.29539400  | 0.97207500  |
| C | -5.38771500 | 2.43258800  | 0.51774900  |
| C | -6.75649600 | 2.55873600  | 0.72938900  |
| C | -7.46578900 | 1.55203700  | 1.39369600  |
| C | -6.79165700 | 0.41536700  | 1.84324200  |
| C | -5.42024900 | 0.28908400  | 1.63266700  |
| C | -0.08484000 | 0.73320500  | 0.02443200  |
| C | -0.34282700 | -0.70981700 | -0.00150500 |
| S | -0.22015900 | -1.70577800 | -4.42340400 |
| C | -0.54514300 | -0.19858600 | -3.42211900 |
| C | -1.75650900 | -0.26726800 | -2.49002700 |
| S | -1.61396900 | -1.42435000 | -1.06711200 |
| H | -2.70057900 | 3.02715700  | 0.07170100  |
| H | -2.87270700 | 0.13989400  | 1.10776300  |
| H | -4.85858100 | 3.21982400  | -0.01132400 |
| H | -7.27604800 | 3.44354400  | 0.37170100  |
| H | -8.53530000 | 1.65376900  | 1.55497200  |
| H | -7.33319600 | -0.37316200 | 2.35837500  |
| H | -4.89875500 | -0.59672200 | 1.98727000  |
| H | -0.73576600 | 0.58280100  | -4.16637700 |
| H | 0.35793300  | 0.09299500  | -2.87981100 |
| H | -2.63439100 | -0.63962000 | -3.02687900 |
| H | -1.99782500 | 0.72312900  | -2.09601800 |
| C | 1.23653700  | 1.28623400  | -0.04522500 |
| C | 1.10807400  | 2.64869900  | -0.01451700 |
| C | 2.06529800  | 3.74531000  | -0.06552300 |
| C | 1.64379700  | 5.06065100  | -0.32825800 |
| C | 2.57217800  | 6.09778800  | -0.38274400 |
| C | 3.92960600  | 5.84076500  | -0.17720900 |
| C | 4.35446800  | 4.53661200  | 0.09195600  |
| C | 3.43269600  | 3.49531000  | 0.15178600  |

|    |             |             |             |
|----|-------------|-------------|-------------|
| H  | 0.58990500  | 5.26246500  | -0.48969300 |
| H  | 2.23404900  | 7.10999400  | -0.58721300 |
| H  | 4.65121800  | 6.65181400  | -0.21886900 |
| H  | 5.40624500  | 4.33054100  | 0.26876700  |
| H  | 3.76791900  | 2.49133100  | 0.39546600  |
| N  | 0.35582400  | -1.51516900 | 0.72367400  |
| H  | 2.15440700  | 0.72481300  | -0.13882700 |
| H  | -0.87845900 | -3.69651100 | -1.72230400 |
| C  | 0.52206800  | -6.48975000 | -0.96358200 |
| C  | 0.04068200  | -5.07273600 | -0.79981200 |
| O  | -0.55702500 | -4.60569900 | -1.91151800 |
| O  | 0.16462600  | -4.40890300 | 0.21471200  |
| H  | 1.02856000  | -6.81228100 | -0.05393800 |
| H  | -0.32785800 | -7.14780100 | -1.17323600 |
| H  | 1.20360000  | -6.55570900 | -1.81791700 |
| H  | 0.29746300  | -2.46654700 | -3.43627400 |
| Cu | 1.75899500  | -1.11767700 | 1.99073200  |
| Br | 3.47748400  | -0.66509100 | 3.35778400  |
| H  | 0.17609900  | -2.51412300 | 0.55640600  |

B3LYP/6-31G\* (Lanl2DZ for Cu)

Thermal correction to Gibbs Free Energy = 0.334885 a.u.

Sum of electronic and thermal Free Energies = -4734.395201 a.u.

M06-2x/6-311++G\*\* (Lanl2DZ for Cu)

Energy = -4737.4093258 a.u.

No imaginary frequency

#### ts5-HOAc

|   |             |             |             |
|---|-------------|-------------|-------------|
| O | 0.85099200  | 2.88381200  | -0.46736900 |
| C | -0.07534700 | 1.90854000  | -0.23460100 |
| C | -1.37905200 | 2.36438400  | 0.16076200  |
| C | -2.24468700 | 1.64966400  | 0.91873600  |
| C | -3.58213200 | 2.06883100  | 1.33742400  |
| C | -4.27517900 | 3.13796100  | 0.73417700  |
| C | -5.53607100 | 3.51397000  | 1.18613200  |
| C | -6.14238700 | 2.82805900  | 2.24376900  |
| C | -5.47611800 | 1.75824000  | 2.84447500  |
| C | -4.21257700 | 1.38137500  | 2.39371700  |
| C | 0.54124400  | 0.67131100  | -0.37240000 |
| C | -0.02290900 | -0.66982800 | -0.31304800 |
| S | -5.17700300 | -1.20165600 | -1.98428600 |
| C | -4.13837800 | -1.41837700 | -0.48145500 |
| C | -2.73612600 | -1.96822600 | -0.73861700 |
| S | -1.63687200 | -0.77075200 | -1.61696300 |
| H | -1.61964900 | 3.38145600  | -0.14000300 |
| H | -1.91128200 | 0.69013600  | 1.31142600  |

|    |             |             |             |
|----|-------------|-------------|-------------|
| H  | -3.82963600 | 3.66541300  | -0.10429400 |
| H  | -6.05453700 | 4.33939000  | 0.70603200  |
| H  | -7.12915300 | 3.12174500  | 2.59023400  |
| H  | -5.93921000 | 1.21770600  | 3.66530200  |
| H  | -3.69207300 | 0.55545300  | 2.87347600  |
| H  | -4.68485000 | -2.14863500 | 0.12518100  |
| H  | -4.11183400 | -0.48343800 | 0.08297400  |
| H  | -2.79215500 | -2.87192300 | -1.35056200 |
| H  | -2.23288500 | -2.21962400 | 0.20291300  |
| C  | 1.91876600  | 0.93284200  | -0.66454000 |
| C  | 2.06387500  | 2.29335800  | -0.72331900 |
| C  | 3.19399800  | 3.17058200  | -0.99845000 |
| C  | 3.01034000  | 4.55526200  | -1.15988100 |
| C  | 4.09898800  | 5.38270400  | -1.42633000 |
| C  | 5.38364900  | 4.84613800  | -1.53618000 |
| C  | 5.57456200  | 3.47100300  | -1.37344100 |
| C  | 4.49213400  | 2.63856500  | -1.10508800 |
| H  | 2.01358900  | 4.97501800  | -1.07561800 |
| H  | 3.94246800  | 6.45098000  | -1.54863900 |
| H  | 6.23083500  | 5.49407000  | -1.74272600 |
| H  | 6.57139400  | 3.04576600  | -1.44861100 |
| H  | 4.65484000  | 1.57415300  | -0.96330400 |
| N  | 0.34347800  | -1.74249300 | 0.16498900  |
| H  | 2.67925500  | 0.18484600  | -0.83336500 |
| H  | -0.85836100 | -1.87861600 | -2.36634200 |
| C  | 0.31000600  | -5.24241000 | -3.00863100 |
| C  | -0.00536300 | -3.95549000 | -2.29801100 |
| O  | -0.29738600 | -2.93076000 | -2.96383200 |
| O  | 0.06210700  | -4.00798200 | -1.00600800 |
| H  | -0.19617100 | -6.07566500 | -2.51330700 |
| H  | 0.01942800  | -5.18058900 | -4.05752100 |
| H  | 1.38789100  | -5.42814600 | -2.93767700 |
| H  | -4.51966000 | -0.13099600 | -2.47881500 |
| Cu | 1.82718400  | -2.04694900 | 1.34726700  |
| Br | 3.60418900  | -2.44490900 | 2.65977300  |
| H  | 0.06135300  | -3.06048500 | -0.50802900 |

B3LYP/6-31G\* (Lanl2DZ for Cu)

Thermal correction to Gibbs Free Energy = 0.328336 a.u.

Sum of electronic and thermal Free Energies = -4734.344297 a.u.

M06-2x/6-311++G\*\* (Lanl2DZ for Cu)

Energy = -4737.3503194 a.u.

Number of Imaginary Frequencies = 1

Lowest Frequency = 851.72i



No metal-catalyst CuBr

ts1'

|   |             |             |             |
|---|-------------|-------------|-------------|
| O | 1.27468000  | -1.28259100 | -0.30337300 |
| C | 0.26653900  | -0.50107400 | -0.23988100 |
| C | -1.03100600 | -1.12971700 | -0.45259700 |
| C | -2.13006600 | -0.88410200 | 0.29249200  |
| C | -3.42535100 | -1.55750700 | 0.20543000  |
| C | -3.72518500 | -2.54108500 | -0.75805800 |
| C | -4.97862200 | -3.14174500 | -0.79380500 |
| C | -5.96422600 | -2.77789300 | 0.13007600  |
| C | -5.68467300 | -1.80507100 | 1.09060300  |
| C | -4.42917200 | -1.20230700 | 1.12590200  |
| C | 0.65222400  | 0.88593500  | 0.02116100  |
| C | -0.09743600 | 2.04864900  | -0.06624100 |
| S | -1.80165900 | 2.23630500  | -0.47287500 |
| C | -1.90259700 | 4.01307500  | -0.00474000 |
| C | -0.57297100 | 4.66227300  | -0.35271800 |
| S | 0.78948800  | 3.54665500  | 0.19417100  |
| H | -1.01765800 | -1.94055000 | -1.17677300 |
| H | -2.06318200 | -0.12342500 | 1.06661500  |
| H | -2.97441300 | -2.83494800 | -1.48545900 |
| H | -5.19085600 | -3.89792000 | -1.54469300 |
| H | -6.94175200 | -3.25109500 | 0.09915200  |
| H | -6.44342900 | -1.51596400 | 1.81261000  |
| H | -4.21366800 | -0.44507300 | 1.87596700  |
| H | -2.11419600 | 4.07989000  | 1.06650500  |
| H | -2.73678600 | 4.45030300  | -0.56162900 |
| H | -0.44775800 | 5.61842800  | 0.16449100  |
| H | -0.48474800 | 4.82895700  | -1.43071600 |
| C | 2.08386000  | 0.96829000  | 0.22521600  |
| C | 2.60726200  | -0.21636800 | 0.06001300  |
| C | 3.84021900  | -0.96420900 | 0.07116300  |
| C | 3.91569600  | -2.34434200 | -0.18916100 |
| C | 5.14525500  | -3.00026400 | -0.16059600 |
| C | 6.31860000  | -2.30100600 | 0.12616500  |
| C | 6.25209600  | -0.92851200 | 0.38613400  |
| C | 5.03111100  | -0.26392000 | 0.35996700  |
| H | 3.00851800  | -2.89369600 | -0.41175100 |
| H | 5.18427900  | -4.06756300 | -0.36427500 |
| H | 7.27444100  | -2.81769400 | 0.14695600  |
| H | 7.15871900  | -0.37200400 | 0.61056600  |
| H | 4.97044700  | 0.80111400  | 0.55953100  |

B3LYP/6-31G\*

Thermal correction to Gibbs Free Energy = 0.253603 a.u.

Sum of electronic and thermal Free Energies = -1681.085909 a.u.

M06-2x/6-311++G\*\*

Energy = -1681.1949005 a.u.

Number of Imaginary Frequencies = 1

Lowest Frequency = 367.92i

**in1'**

|   |             |             |             |
|---|-------------|-------------|-------------|
| O | -0.62252000 | 2.21741800  | 0.01904100  |
| C | -1.34532500 | 1.11023400  | -0.11922900 |
| C | -2.74125900 | 1.25685300  | 0.14909300  |
| C | -3.73983600 | 0.46830900  | -0.33020700 |
| C | -5.16446600 | 0.60612700  | -0.05517600 |
| C | -5.68177300 | 1.46827100  | 0.93437500  |
| C | -7.05208500 | 1.56597300  | 1.14707800  |
| C | -7.94354700 | 0.80444300  | 0.38376500  |
| C | -7.44931400 | -0.06077000 | -0.59418800 |
| C | -6.07719600 | -0.15982100 | -0.80817300 |
| C | -0.44197600 | 0.06279000  | -0.50792300 |
| C | -0.57612400 | -1.32582900 | -0.55856300 |
| S | -1.98942700 | -2.29995200 | -0.23754700 |
| C | -1.06410900 | -3.88362400 | -0.03600600 |
| C | 0.10144900  | -3.84947100 | -1.00765800 |
| S | 0.91030300  | -2.17848300 | -0.91422100 |
| H | -2.98544400 | 2.13611900  | 0.74104800  |
| H | -3.48548000 | -0.31883800 | -1.03508600 |
| H | -5.00497700 | 2.05427300  | 1.54886600  |
| H | -7.42964600 | 2.23485100  | 1.91573500  |
| H | -9.01354500 | 0.88299600  | 0.55480500  |
| H | -8.13327600 | -0.65860500 | -1.19042600 |
| H | -5.69654000 | -0.83244900 | -1.57321800 |
| H | -1.76425200 | -4.69845900 | -0.24179100 |
| H | -0.72705000 | -3.95286400 | 1.00254700  |
| H | -0.22973800 | -4.03063000 | -2.03533200 |
| H | 0.85969200  | -4.59286200 | -0.74433700 |
| C | 0.90239700  | 0.58750800  | -0.66567000 |
| C | 0.74390500  | 1.89523500  | -0.32369300 |
| C | 1.66108100  | 3.02296400  | -0.23659700 |
| C | 1.25448900  | 4.31184700  | 0.15201200  |
| C | 2.17714200  | 5.35532400  | 0.21582800  |
| C | 3.51787000  | 5.13608300  | -0.10457200 |
| C | 3.93050900  | 3.85670300  | -0.49185400 |
| C | 3.01604700  | 2.81134400  | -0.55785500 |
| H | 0.21417400  | 4.49216800  | 0.40253500  |
| H | 1.84476900  | 6.34563900  | 0.51787100  |
| H | 4.23433300  | 5.95182300  | -0.05353100 |
| H | 4.97249500  | 3.67465300  | -0.74371800 |

H 3.32085400 1.81297800 -0.85574900

B3LYP/6-31G\*

Thermal correction to Gibbs Free Energy = 0.255564 a.u.

Sum of electronic and thermal Free Energies = -1681.091864 a.u.

M06-2x/6-311++G\*\*

Energy = -1681.2056948 a.u.

No imaginary frequency

**in2'**

|   |             |             |             |
|---|-------------|-------------|-------------|
| O | -1.27244100 | -1.35718200 | -0.11450700 |
| C | -0.15516900 | -0.64082800 | -0.22270000 |
| C | 1.05324900  | -1.36864200 | 0.00696900  |
| C | 2.29292900  | -1.03974700 | -0.44370000 |
| C | 3.52867600  | -1.77542700 | -0.20628300 |
| C | 3.62949100  | -2.85153000 | 0.70040000  |
| C | 4.83449200  | -3.52139400 | 0.87898000  |
| C | 5.97303600  | -3.13505300 | 0.16356900  |
| C | 5.89438200  | -2.06707700 | -0.73213300 |
| C | 4.68813300  | -1.39560400 | -0.91216500 |
| C | -0.54437400 | 0.70055100  | -0.55294700 |
| C | 0.15806200  | 1.91029800  | -0.55375000 |
| S | 1.83385700  | 2.19986700  | -0.17835000 |
| C | 1.62934400  | 4.01097900  | 0.12155100  |
| C | 0.59700900  | 4.50843000  | -0.87339200 |
| S | -0.82858000 | 3.31706700  | -0.88912100 |
| H | 0.90525200  | -2.30340600 | 0.54325100  |
| H | 2.39608200  | -0.17320900 | -1.09106500 |
| H | 2.76128400  | -3.15666400 | 1.27679100  |
| H | 4.89026600  | -4.34695200 | 1.58343400  |
| H | 6.91285900  | -3.66066200 | 0.30785400  |
| H | 6.77330300  | -1.75705000 | -1.29084100 |
| H | 4.63097000  | -0.56594400 | -1.61284800 |
| H | 2.60990700  | 4.47584200  | -0.01727300 |
| H | 1.28088900  | 4.13072700  | 1.15435100  |
| H | 1.00503400  | 4.59015400  | -1.88629600 |
| H | 0.19868400  | 5.48170800  | -0.57105800 |
| C | -1.98646900 | 0.78546500  | -0.70563400 |
| C | -2.38102600 | -0.48577100 | -0.41764900 |
| C | -3.68369400 | -1.13368800 | -0.35220700 |
| C | -3.84775500 | -2.48982500 | -0.01750900 |
| C | -5.12022600 | -3.05797900 | 0.03030800  |
| C | -6.25051200 | -2.28963100 | -0.25315000 |
| C | -6.09610500 | -0.93990100 | -0.58742000 |
| C | -4.83028300 | -0.36662600 | -0.63710000 |
| H | -2.97500500 | -3.09572500 | 0.20341700  |

|   |             |             |             |
|---|-------------|-------------|-------------|
| H | -5.22768600 | -4.10836200 | 0.29046000  |
| H | -7.24084100 | -2.73593100 | -0.21490800 |
| H | -6.96955400 | -0.33204800 | -0.81113800 |
| H | -4.69373600 | 0.67907600  | -0.89476600 |
| N | -0.30890100 | 3.70744000  | 2.85062400  |
| H | -1.04145200 | 3.31950900  | 2.25597200  |
| H | -0.75313300 | 4.44057200  | 3.40255600  |
| H | -0.06345100 | 2.96941600  | 3.50968400  |

B3LYP/6-31G\*

Thermal correction to Gibbs Free Energy = 0.285855 a.u.

Sum of electronic and thermal Free Energies = -1737.618238 a.u.

M06-2x/6-311++G\*\*

Energy = -1737.761671 a.u.

No imaginary frequency

**ts2'**

|   |             |             |             |
|---|-------------|-------------|-------------|
| O | -1.33253900 | -1.34614000 | 0.08503700  |
| C | -0.22925700 | -0.56203800 | 0.12773100  |
| C | 1.00692500  | -1.29687100 | 0.19389400  |
| C | 2.21852800  | -0.90663500 | -0.27016000 |
| C | 3.46954500  | -1.65548700 | -0.17440100 |
| C | 3.62164900  | -2.82062400 | 0.60544400  |
| C | 4.83512800  | -3.49898300 | 0.64865900  |
| C | 5.93586800  | -3.03234200 | -0.07723900 |
| C | 5.80769800  | -1.87495900 | -0.84692000 |
| C | 4.59200200  | -1.19667200 | -0.89203400 |
| C | -0.66068200 | 0.77124400  | 0.03205300  |
| C | 0.05371200  | 2.02475000  | 0.14675500  |
| S | 1.66913000  | 2.20576900  | 0.84939400  |
| C | 1.73765700  | 4.01202400  | 0.53637300  |
| C | 1.19241900  | 4.26385700  | -0.86505100 |
| S | -0.31573100 | 3.22733600  | -1.12159800 |
| H | 0.89156100  | -2.29251800 | 0.61867100  |
| H | 2.29107500  | 0.04097100  | -0.79714600 |
| H | 2.78571400  | -3.19060900 | 1.19188100  |
| H | 4.92686000  | -4.39471400 | 1.25759900  |
| H | 6.88281800  | -3.56367700 | -0.03803800 |
| H | 6.65577200  | -1.49987000 | -1.41403300 |
| H | 4.49771700  | -0.29786900 | -1.49744600 |
| H | 2.78197200  | 4.32467100  | 0.62847700  |
| H | 1.14545600  | 4.52852400  | 1.29816700  |
| H | 1.93065100  | 3.99668900  | -1.62671500 |
| H | 0.91367100  | 5.31382500  | -0.99704900 |
| C | -2.10481900 | 0.83088300  | -0.09129200 |
| C | -2.44543400 | -0.49745400 | -0.04931700 |

|   |             |             |             |
|---|-------------|-------------|-------------|
| C | -3.73638700 | -1.17255500 | -0.09494700 |
| C | -3.86361900 | -2.57040200 | 0.00050600  |
| C | -5.12041200 | -3.17210200 | -0.04377200 |
| C | -6.27308700 | -2.39683600 | -0.18349200 |
| C | -6.15596900 | -1.00620300 | -0.28074200 |
| C | -4.90521300 | -0.39977200 | -0.23794100 |
| H | -2.97241000 | -3.18018100 | 0.10793200  |
| H | -5.19862700 | -4.25419000 | 0.03114200  |
| H | -7.25139800 | -2.86926700 | -0.21796800 |
| H | -7.04682200 | -0.39244100 | -0.39202800 |
| H | -4.79924300 | 0.67802100  | -0.31376200 |
| N | -1.24968800 | 2.77366500  | 1.62451300  |
| H | -2.04115100 | 2.31990600  | 1.09560600  |
| H | -1.37592400 | 3.77835800  | 1.73509600  |
| H | -1.12145300 | 2.32123500  | 2.52835400  |

B3LYP/6-31G\*

Thermal correction to Gibbs Free Energy = 0.291278 a.u.

Sum of electronic and thermal Free Energies = -1737.587901 a.u.

M06-2x/6-311++G\*\*

Energy = -1054.7162404 a.u.

Number of Imaginary Frequencies = 1

Lowest Frequency = 341.59i

**in3'**

|   |            |             |             |
|---|------------|-------------|-------------|
| O | 0.55037700 | 2.07617500  | -0.25440500 |
| C | 1.18390000 | 0.85653400  | -0.30459800 |
| C | 2.60847300 | 0.97168200  | -0.11948100 |
| C | 3.46107200 | 0.00721600  | 0.29020900  |
| C | 4.90733100 | 0.15225200  | 0.45894100  |
| C | 5.64535100 | 1.22759600  | -0.07488400 |
| C | 7.01829200 | 1.32339000  | 0.12917500  |
| C | 7.69592300 | 0.34496800  | 0.86343600  |
| C | 6.98375700 | -0.73431800 | 1.38903400  |
| C | 5.60881500 | -0.82929400 | 1.18572400  |
| C | 0.22376300 | -0.12877000 | -0.52325800 |
| C | 0.33687700 | -1.62168100 | -0.73447400 |
| S | 1.75427600 | -2.05731900 | -1.95661500 |
| C | 2.55437700 | -3.39023300 | -0.98043200 |
| C | 1.56416600 | -3.92974200 | 0.05140800  |
| S | 0.73862400 | -2.50379800 | 0.85409800  |
| H | 2.97839400 | 1.98033400  | -0.29278900 |
| H | 3.05025600 | -0.95798600 | 0.56938400  |
| H | 5.14113100 | 1.98312700  | -0.67028800 |
| H | 7.56657200 | 2.16073900  | -0.29477200 |
| H | 8.76894800 | 0.42102000  | 1.01666600  |

|   |             |             |             |
|---|-------------|-------------|-------------|
| H | 7.49944100  | -1.50308000 | 1.95869700  |
| H | 5.05764500  | -1.66756900 | 1.60622000  |
| H | 3.44691400  | -2.99507100 | -0.48648800 |
| H | 2.86194800  | -4.17864400 | -1.67566200 |
| H | 2.07551600  | -4.49334400 | 0.83897400  |
| H | 0.82589900  | -4.59197500 | -0.41361300 |
| C | -1.03417100 | 0.54959400  | -0.56644700 |
| C | -0.79322000 | 1.88796400  | -0.40424200 |
| C | -1.64894300 | 3.06520900  | -0.36172200 |
| C | -1.10389700 | 4.34928400  | -0.18145500 |
| C | -1.93130200 | 5.46907100  | -0.14209800 |
| C | -3.31400600 | 5.33308000  | -0.28045500 |
| C | -3.86468800 | 4.06100200  | -0.45889400 |
| C | -3.04379200 | 2.93838100  | -0.49939900 |
| H | -0.03035900 | 4.45995700  | -0.07162800 |
| H | -1.49245800 | 6.45340800  | -0.00151600 |
| H | -3.95700200 | 6.20828800  | -0.24872300 |
| H | -4.93968300 | 3.94264400  | -0.56626100 |
| H | -3.48450100 | 1.95512900  | -0.63707400 |
| N | -0.94181000 | -2.10736200 | -1.22577000 |
| H | -1.99182600 | 0.06959200  | -0.69324600 |
| H | -0.90679000 | -3.11894900 | -1.32768000 |
| H | -1.10698800 | -1.72869900 | -2.15949300 |

B3LYP/6-31G\*

Thermal correction to Gibbs Free Energy = 0.296220 a.u.

Sum of electronic and thermal Free Energies = -1737.702177 a.u.

M06-2x/6-311++G\*\*

Energy = -1737.8596283 a.u.

No imaginary frequency
